# Supplementary material for: Role of the membrane-spanning 4A gene family in lung adenocarcinoma
Source: Front Genet. 2023 Jul 18;14:1162787. doi: 10.3389/fgene.2023.1162787 (PMC10390740; doi:10.3389/fgene.2023.1162787)
Supplement: Supplementary file 1 [file Table2.XLSX]

## Sheet: Table S2
	times	status	MS4A2	MS4A14	MS4A15	Risk	riskScore
TCGA-35-5375-01	0.723288	0	0.872711	0.299831	0.383055	High_risk	-0.163527
TCGA-55-A4DF-01	1.68219	1	1.15348	3.04747	7.03458	Low_risk	-0.913105
TCGA-95-8039-01	2.27397	0	2.70244	1.36121	3.74689	Low_risk	-0.716121
TCGA-MP-A4T4-01	7.16986	1	2.31939	2.34099	0.502738	Low_risk	-0.563374
TCGA-62-A471-01	3.4137	0	0.880568	1.1141	0.876802	High_risk	-0.28154
TCGA-L9-A5IP-01	0.158904	1	0.781821	0.649845	0	High_risk	-0.164428
TCGA-50-5936-01	0.70411	1	1.07936	1.37618	0.0802483	High_risk	-0.282365
TCGA-49-AARR-01	13.6767	0	2.75999	3.19571	3.64247	Low_risk	-0.908794
TCGA-78-8662-01	9.20822	1	0.631058	0.710702	6.82127	Low_risk	-0.590121
TCGA-05-4430-01	2.08493	0	3.08926	1.09559	5.17017	Low_risk	-0.827298
TCGA-44-7659-01	1.89315	0	2.12555	1.25598	8.98464	Low_risk	-0.970259
TCGA-44-6146-01	1.99452	0	2.07508	0.698782	1.82329	High_risk	-0.445918
TCGA-L9-A50W-01	1.21096	1	3.24901	0.814263	1.29684	Low_risk	-0.568844
TCGA-75-7025-01	9.05479	0	2.87456	2.29907	1.4632	Low_risk	-0.689029
TCGA-05-4424-01	2.50137	0	2.63865	1.046	3.88232	Low_risk	-0.683918
TCGA-62-A46P-01	1.6274	1	1.04019	0.687777	1.16169	High_risk	-0.274806
TCGA-38-4627-01	3.14247	1	2.98847	0.83131	0.90512	High_risk	-0.513389
TCGA-86-8073-01	2.0274	0	3.3737	2.63675	5.41256	Low_risk	-1.03944
TCGA-69-7765-01	0.452055	0	1.52567	1.7455	1.95769	High_risk	-0.496578
TCGA-44-5645-01	2.33425	0	3.57436	1.67986	1.65814	Low_risk	-0.722847
TCGA-55-6984-01	2.08219	1	0.890096	0.327112	1.54062	High_risk	-0.242837
TCGA-69-7764-01	1.13425	0	1.35253	0.907275	3.82452	High_risk	-0.507229
TCGA-NJ-A4YI-01	0.0109589	1	1.0467	3.15835	0.62742	High_risk	-0.50027
TCGA-86-A4P7-01	1.13699	0	3.2552	3.06454	5.4828	Low_risk	-1.07419
TCGA-55-8620-01	1.0274	1	0.663937	0.900258	1.173	High_risk	-0.251453
TCGA-97-8177-01	1.36712	0	3.53874	2.30241	5.73908	Low_risk	-1.04569
TCGA-50-6595-01	0.517808	1	0.666302	1.4037	0.431569	High_risk	-0.256918
TCGA-55-A492-01	1.63288	0	1.00079	0.560617	0.973721	High_risk	-0.244558
TCGA-78-7633-01	4.1863	1	1.11623	0.399335	9.10227	Low_risk	-0.76368
TCGA-97-A4LX-01	1.68219	0	2.66755	2.48643	1.88143	Low_risk	-0.710014
TCGA-78-7220-01	2.21096	1	1.67843	0.945533	1.1117	High_risk	-0.377239
TCGA-53-7624-01	2.85753	1	0.201132	0.680684	1.34079	High_risk	-0.182196
TCGA-49-AARN-01	3.10959	1	1.37757	0.938323	1.91778	High_risk	-0.391166
TCGA-62-A46R-01	4.72603	1	3.83177	2.23177	0.95293	Low_risk	-0.767136
TCGA-78-7156-01	2.67397	1	2.01396	0.374956	4.88434	Low_risk	-0.600949
TCGA-50-8457-01	3.08219	0	3.32507	1.5853	6.87239	Low_risk	-1.01695
TCGA-91-8496-01	1.38356	0	2.97735	1.78048	3.91953	Low_risk	-0.805017
TCGA-55-8092-01	0.421918	1	0.369494	0.857185	0.130931	High_risk	-0.143771
TCGA-NJ-A4YQ-01	3.92329	0	2.07919	1.41164	2.55277	Low_risk	-0.567974
TCGA-50-5072-01	0.684932	1	1.10286	0.758133	2.35253	High_risk	-0.366346
TCGA-91-6831-01	0.849315	0	0.834711	0.638398	0.0600474	High_risk	-0.173598
TCGA-91-A4BD-01	1.65205	0	2.68089	2.18995	3.37068	Low_risk	-0.776182
TCGA-69-8255-01	0.353425	0	0.363227	1.05922	1.27715	High_risk	-0.237756
TCGA-69-8253-01	1.16712	0	0.714663	0.784336	4.24942	High_risk	-0.44304
TCGA-86-A4D0-01	0.317808	1	0.272859	1.78165	0.921436	High_risk	-0.279512
TCGA-78-8640-01	19.3479	0	0.967169	1.15186	2.87385	High_risk	-0.424365
TCGA-97-8174-01	0.449315	1	2.20445	1.95315	4.73233	Low_risk	-0.78008
TCGA-55-6987-01	5.85479	0	2.13875	1.9558	1.31545	Low_risk	-0.552918
TCGA-49-6744-01	4.61096	0	2.88251	1.06281	4.39212	Low_risk	-0.748447
TCGA-55-8096-01	1.96986	1	1.77812	2.49557	5.2933	Low_risk	-0.820426
TCGA-J2-8192-01	2.02466	0	3.39867	2.36241	2.83461	Low_risk	-0.84827
TCGA-44-7671-01	2.43562	0	2.08726	0.284277	0.419431	High_risk	-0.313852
TCGA-44-2662-01	3.50685	0	1.76507	2.65825	0.18819	High_risk	-0.50815
TCGA-93-A4JN-01	1.96712	0	2.81787	1.82093	2.40738	Low_risk	-0.692539
TCGA-49-AAR9-01	0.712329	1	0.101919	0.513188	0.0994972	High_risk	-0.0727334
TCGA-86-A4P8-01	2.20548	0	4.08126	3.99843	6.72339	Low_risk	-1.35348
TCGA-78-7158-01	0.490411	1	2.55385	1.16485	0.977536	High_risk	-0.499458
TCGA-80-5611-01	7.10959	0	1.43419	1.37723	4.92735	Low_risk	-0.637344
TCGA-44-4112-01	2.2137	1	3.67378	0.676719	0.780394	Low_risk	-0.573602
TCGA-71-6725-01	0.70137	0	0.349026	1.54399	8.89557	Low_risk	-0.775879
TCGA-44-2656-01	3.91507	0	3.53786	2.5277	1.68527	Low_risk	-0.808961
TCGA-05-5715-01	0.169863	0	2.55051	3.10492	2.63345	Low_risk	-0.808699
TCGA-64-5815-01	2.3726	0	1.57768	1.97556	1.27935	High_risk	-0.483554
TCGA-55-7816-01	1.28219	1	1.80252	3.52404	0.497331	Low_risk	-0.623359
TCGA-95-7948-01	1.30411	0	1.29225	0.734916	9.87051	Low_risk	-0.869855
TCGA-05-4432-01	2.08493	0	0.873183	1.2032	3.93172	High_risk	-0.486078
TCGA-99-8033-01	1.79726	1	1.29131	1.51051	0.163756	High_risk	-0.327916
TCGA-78-7143-01	13.5918	1	2.11547	1.84647	0.87578	High_risk	-0.510367
TCGA-73-4668-01	1.27945	0	1.80476	0.9568	4.4024	Low_risk	-0.605226
TCGA-44-5644-01	2.36438	0	0.830418	0.973868	3.1106	High_risk	-0.40406
TCGA-38-4625-01	8.14521	0	2.37551	1.60141	2.24598	Low_risk	-0.604674
TCGA-91-8499-01	0.0986301	0	0.228357	0.817787	0.416516	High_risk	-0.140587
TCGA-86-6851-01	0.490411	0	1.74476	1.66134	6.62491	Low_risk	-0.814356
TCGA-44-6779-01	1.36986	1	3.07104	0.91976	0	High_risk	-0.474729
TCGA-78-7537-01	4.44384	1	1.6364	0.841812	0.248535	High_risk	-0.30578
TCGA-05-4434-01	1.25205	1	2.57848	0.697151	5.58466	Low_risk	-0.749221
TCGA-67-3773-01	1.16986	0	3.8127	0.931305	2.4936	Low_risk	-0.727379
TCGA-55-6983-01	7.73425	0	2.04177	1.22571	1.89829	High_risk	-0.50186
TCGA-05-5425-01	2.41644	0	1.22274	0.66102	2.02176	High_risk	-0.349702
TCGA-97-A4M2-01	1.70959	0	3.72883	3.66644	5.4948	Low_risk	-1.1964
TCGA-50-5941-01	4.03836	0	3.17698	1.36036	2.84623	Low_risk	-0.716674
TCGA-78-7539-01	2.16712	0	1.57202	1.57507	8.39798	Low_risk	-0.897854
TCGA-67-3771-01	1.67123	0	0.660198	2.05554	5.93625	Low_risk	-0.67786
TCGA-55-8299-01	1.28493	1	3.06929	1.10185	3.55474	Low_risk	-0.721793
TCGA-05-5429-01	0.753425	1	1.48985	0.215244	0	High_risk	-0.206096
TCGA-93-A4JO-01	0.090411	1	2.06443	2.76975	3.45891	Low_risk	-0.766678
TCGA-44-A47A-01	1.27671	0	2.24407	2.50878	0.436162	Low_risk	-0.567409
TCGA-86-A4JF-01	2.01918	1	1.79967	1.89836	5.41192	Low_risk	-0.768097
TCGA-05-4402-01	0.668493	1	1.78802	1.02247	3.93175	Low_risk	-0.579835
TCGA-97-8179-01	1.19178	0	1.41116	2.10735	2.72131	Low_risk	-0.56942
TCGA-55-7914-01	0.512329	1	2.58301	0.28155	4.87975	Low_risk	-0.660966
TCGA-49-4490-01	1.05479	1	1.49175	2.06454	4.87775	Low_risk	-0.713292
TCGA-55-8090-01	1.63836	1	1.0795	1.24957	2.0285	High_risk	-0.394178
TCGA-MP-A4TC-01	0.20274	1	1.72984	1.10796	2.84491	High_risk	-0.511858
TCGA-64-1681-01	3.19726	1	1.28812	1.55562	6.95005	Low_risk	-0.767894
TCGA-99-AA5R-01	1.80274	0	2.75009	2.58019	6.13096	Low_risk	-1.00281
TCGA-49-4486-01	6.35068	1	0.0758749	0.0724489	3.19322	High_risk	-0.221928
TCGA-91-6847-01	2.30685	0	0.304628	0.369829	0.0384362	High_risk	-0.078759
TCGA-05-4249-01	4.1726	0	3.84657	0.771209	3.55681	Low_risk	-0.783023
TCGA-91-A4BC-01	0.120548	0	1.13034	1.14137	0.236952	High_risk	-0.274092
TCGA-55-7570-01	2.25753	0	1.3069	0.706376	0.378179	High_risk	-0.259315
TCGA-50-5049-01	8.47671	0	0.786764	1.37718	4.76058	Low_risk	-0.546876
TCGA-86-8672-01	0.0520548	1	0.214125	1.67138	2.27384	High_risk	-0.347536
TCGA-55-7727-01	0.326027	0	2.45988	1.96403	2.66637	Low_risk	-0.680063
TCGA-86-8674-01	2.20822	0	0.0542233	0.278223	0.641639	High_risk	-0.0770319
TCGA-53-A4EZ-01	2.93425	0	0.629566	1.14828	0.904349	High_risk	-0.25597
TCGA-69-7761-01	0.509589	0	3.28716	1.07361	0.19774	Low_risk	-0.530173
TCGA-50-5942-01	5.06027	0	4.33974	0.721766	1.38471	Low_risk	-0.699158
TCGA-69-A59K-01	1.61918	0	0.886121	1.5141	2.16835	High_risk	-0.407061
TCGA-44-2666-01	0.265753	1	4.78485	0.713637	1.98373	Low_risk	-0.791592
TCGA-50-5944-01	4.79452	0	4.1698	1.15969	5.5587	Low_risk	-0.992071
TCGA-50-6592-01	2.12877	1	0.870029	1.46978	1.16524	High_risk	-0.336039
TCGA-62-8395-01	3.33151	0	2.28777	1.11636	6.21172	Low_risk	-0.797602
TCGA-05-4410-01	0	0	1.93832	1.21456	1.52236	High_risk	-0.463816
TCGA-55-6975-01	0.323288	1	1.47166	0.353097	0	High_risk	-0.218304
TCGA-73-4662-01	6.89041	0	1.77985	1.29572	3.95226	Low_risk	-0.608786
TCGA-49-6767-01	1.85479	0	0.064469	2.15445	5.00055	Low_risk	-0.554773
TCGA-44-A47G-01	0.961644	0	1.89052	2.08522	1.1356	Low_risk	-0.52436
TCGA-NJ-A4YG-01	6.19452	0	2.0731	3.15022	3.54405	Low_risk	-0.813091
TCGA-55-8507-01	1.14521	0	2.38739	1.35282	3.22865	Low_risk	-0.643162
TCGA-05-4433-01	2	0	2.21751	1.89371	3.21801	Low_risk	-0.678247
TCGA-55-A4DG-01	1.66575	0	2.64413	1.63143	9.40193	Low_risk	-1.10028
TCGA-49-4494-01	2.96164	1	0.406537	0.394295	0.724301	High_risk	-0.137906
TCGA-NJ-A7XG-01	1.69041	0	1.6089	0.958954	3.18539	High_risk	-0.5032
TCGA-44-6147-01	2.31507	0	3.37144	2.29962	6.3583	Low_risk	-1.06453
TCGA-49-AARO-01	10.2986	0	1.1626	1.87884	0.343237	High_risk	-0.362189
TCGA-44-6774-01	1.80274	0	1.7946	0.738725	4.97265	Low_risk	-0.617724
TCGA-49-AAR4-01	2.40822	1	1.2655	0.615228	1.60782	High_risk	-0.323596
TCGA-91-6848-01	0.613699	0	1.32579	1.36435	0.160404	High_risk	-0.316628
TCGA-50-8460-01	2.27123	0	3.54971	1.23462	1.29572	Low_risk	-0.649877
TCGA-44-2668-01	2.08493	1	1.44858	2.56974	0.333309	High_risk	-0.469201
TCGA-55-8091-01	1.64384	0	2.42468	1.91031	0.300651	Low_risk	-0.51823
TCGA-50-6673-01	0.060274	1	1.58019	0.82489	1.34045	High_risk	-0.367176
TCGA-49-AARE-01	3.36712	1	0.463936	1.60322	0.674732	High_risk	-0.268511
TCGA-55-6985-01	3.37808	0	2.59431	1.16504	4.50637	Low_risk	-0.730994
TCGA-55-6642-01	6.70959	0	1.61927	0.518031	0.643117	High_risk	-0.295062
TCGA-50-6591-01	0.326027	1	0	0.336169	0.206018	High_risk	-0.0484615
TCGA-78-7166-01	0.706849	1	0.167101	0.419215	0.551098	High_risk	-0.0999035
TCGA-05-4427-01	2.16712	0	1.192	1.76791	1.26766	High_risk	-0.413527
TCGA-49-4487-01	2.34247	1	0.528571	1.36418	2.72544	High_risk	-0.383062
TCGA-73-4676-01	0.769863	1	2.32152	1.29131	2.51576	Low_risk	-0.582838
TCGA-49-4507-01	0.734247	1	0.839315	1.50197	0.773828	High_risk	-0.310503
TCGA-78-7148-01	1.71507	1	0.794936	0.455649	1.16279	High_risk	-0.220333
TCGA-55-8514-01	1.42466	0	0.535257	1.75596	6.24031	Low_risk	-0.650585
TCGA-93-A4JQ-01	1.4411	0	1.38824	1.34443	3.19142	High_risk	-0.516809
TCGA-55-7576-01	1.83562	0	2.35425	0.751892	2.20777	High_risk	-0.510558
TCGA-55-6969-01	3.39452	0	1.20257	1.27536	1.75933	High_risk	-0.394764
TCGA-93-7347-01	1.87123	0	3.18503	1.15484	6.75992	Low_risk	-0.94736
TCGA-69-7978-01	0.367123	0	2.57221	2.46861	0.850239	Low_risk	-0.630204
TCGA-NJ-A4YF-01	5.92055	0	0.0984196	0.556895	1.18155	High_risk	-0.146345
TCGA-91-6830-01	0.164384	0	3.48165	1.334	5.21123	Low_risk	-0.903262
TCGA-44-7672-01	1.96986	0	1.0418	1.04495	0.821057	High_risk	-0.290576
TCGA-78-7540-01	3.27945	1	0.32987	0.612588	2.74859	High_risk	-0.28129
TCGA-55-7227-01	2.60822	1	2.66421	1.44763	1.19099	Low_risk	-0.556396
TCGA-MP-A4T6-01	4.90411	1	2.24893	2.6551	2.44015	Low_risk	-0.71199
TCGA-99-8028-01	3.06301	0	0.546956	0.814427	3.38019	High_risk	-0.369735
TCGA-64-1677-01	1.72055	1	0.472384	0.516822	1.91564	High_risk	-0.235338
TCGA-05-4403-01	1.58356	0	1.51959	0.431676	3.78962	High_risk	-0.475718
TCGA-44-6148-01	1.92877	0	4.35998	1.383	2.98714	Low_risk	-0.873827
TCGA-55-6980-01	5.77808	0	1.90839	1.79722	3.92419	Low_risk	-0.675385
TCGA-55-8511-01	1.51233	0	1.25942	2.31446	3.40501	Low_risk	-0.616327
TCGA-86-8278-01	2.5863	0	2.96196	1.53391	4.03081	Low_risk	-0.78442
TCGA-78-7167-01	7.34521	1	1.77623	0.269751	3.66389	High_risk	-0.48229
TCGA-55-8615-01	1.22192	0	0.279768	0.822852	0.132774	High_risk	-0.129237
TCGA-55-A494-01	1.31781	0	0.0735461	0.889551	0.0482362	High_risk	-0.105397
TCGA-78-7147-01	1.60548	1	2.18913	1.37273	6.45897	Low_risk	-0.828194
TCGA-97-A4M0-01	1.7863	0	2.84115	2.64418	1.69866	Low_risk	-0.736201
TCGA-55-7573-01	1.33425	0	3.56345	1.83269	3.9212	Low_risk	-0.882798
TCGA-86-7714-01	1.71233	1	2.25008	1.54082	0.188654	High_risk	-0.450803
TCGA-64-1679-01	6.81644	0	1.64787	1.86231	6.4964	Low_risk	-0.815235
TCGA-64-1680-01	3.08493	0	2.50287	0.550704	0.668391	High_risk	-0.408959
TCGA-86-8669-01	2.56986	0	0.569588	1.12055	1.11076	High_risk	-0.258925
TCGA-78-7145-01	2.26301	1	2.93267	1.47015	1.5141	Low_risk	-0.612569
TCGA-86-8075-01	1.90137	1	2.21226	0.970044	4.71061	Low_risk	-0.6766
TCGA-99-8025-01	2.90411	0	0.806943	1.046	4.19302	High_risk	-0.478215
TCGA-L9-A743-01	1.81918	0	1.81873	1.54374	1.90927	High_risk	-0.508425
TCGA-86-8054-01	3.14521	0	1.74739	0.380508	2.92246	High_risk	-0.44275
TCGA-55-8094-01	1.48219	0	0.126048	0.345623	1.38051	High_risk	-0.140376
TCGA-62-A470-01	3.27123	1	1.23186	2.42766	3.2822	Low_risk	-0.616913
TCGA-86-A456-01	2.45479	0	1.96691	3.42601	9.34558	Low_risk	-1.20134
TCGA-MP-A4SW-01	4.87123	1	2.15033	2.02765	5.19471	Low_risk	-0.810903
TCGA-44-3919-01	2.81096	1	3.1018	1.57937	3.41839	Low_risk	-0.767098
TCGA-80-5608-01	7.7589	0	0.586501	0.802069	2.46148	High_risk	-0.314335
TCGA-69-7973-01	0.630137	0	1.60212	2.43352	4.34945	Low_risk	-0.731651
TCGA-86-8671-01	2.29863	0	2.86736	2.17332	4.03472	Low_risk	-0.840038
TCGA-67-3772-01	1.56986	0	2.44	0.679424	4.8257	Low_risk	-0.681582
TCGA-35-4122-01	0.616438	0	0.686075	0.622274	1.24477	High_risk	-0.22965
TCGA-55-8513-01	2.16712	0	2.18317	2.84473	4.95354	Low_risk	-0.885111
TCGA-35-4123-01	0.49863	0	2.07745	1.1398	0.073409	High_risk	-0.380104
TCGA-49-6761-01	0.969863	0	0.835116	0.25544	1.79298	High_risk	-0.244752
TCGA-55-6982-01	2.72603	1	1.20708	1.00691	6.5489	Low_risk	-0.674644
TCGA-44-A4SU-01	1.12055	1	1.28131	1.84463	2.29266	High_risk	-0.49837
TCGA-86-8279-01	2.6	0	0.412619	0.989866	8.51767	Low_risk	-0.701371
TCGA-05-4396-01	0.830137	1	1.27858	0.772646	0.082975	High_risk	-0.243822
TCGA-86-8358-01	1.78904	0	0.825216	1.8757	1.29319	High_risk	-0.38128
TCGA-55-7815-01	2.11781	0	1.87806	0.680324	0	High_risk	-0.302668
TCGA-78-7162-01	8.68219	1	3.21196	0.882995	4.27654	Low_risk	-0.762765
TCGA-NJ-A55A-01	0.0410959	0	4.33634	1.73031	4.11076	Low_risk	-0.979449
TCGA-MN-A4N1-01	2.26575	0	0.232047	0.699107	2.40087	High_risk	-0.255986
TCGA-44-6777-01	2.70411	1	2.47475	1.87523	0.359521	Low_risk	-0.5245
TCGA-55-8301-01	1.46301	0	1.2667	1.70292	3.79103	Low_risk	-0.577903
TCGA-05-4422-01	1	0	0.164915	1.48769	0.15095	High_risk	-0.185942
TCGA-49-4506-01	2.73699	1	0.1125	0.561204	0.193961	High_risk	-0.0851339
TCGA-05-4417-01	1.24658	0	1.56876	1.08018	2.8989	High_risk	-0.492571
TCGA-75-5146-01	6.48767	0	1.56448	1.16594	7.41627	Low_risk	-0.791021
TCGA-62-A46O-01	3.98356	1	0.413269	0.519944	1.14978	High_risk	-0.179219
TCGA-97-8552-01	1.71507	0	2.16269	2.34579	5.21271	Low_risk	-0.846929
TCGA-MP-A5C7-01	6.1589	0	0.931154	0.56774	1.08997	High_risk	-0.244188
TCGA-86-8074-01	0.0657534	0	0.806778	1.83107	2.13711	High_risk	-0.428505
TCGA-97-7937-01	1.54521	0	2.23088	0.865127	4.96734	Low_risk	-0.684378
TCGA-97-8175-01	1.50959	0	0.98178	2.02471	1.32947	High_risk	-0.418514
TCGA-97-A4M7-01	1.72329	0	3.41262	2.10427	1.52642	Low_risk	-0.738952
TCGA-05-4420-01	2.49863	0	0.27023	0.183582	0.60521	High_risk	-0.0913832
TCGA-91-8497-01	1.18904	1	3.98045	1.25381	6.88258	Low_risk	-1.0636
TCGA-38-4632-01	3.71781	1	1.44821	0.879078	1.90931	High_risk	-0.393115
TCGA-69-7979-01	1.11781	0	0.708496	1.6504	6.99058	Low_risk	-0.709025
TCGA-78-7163-01	19.8575	0	0.250962	0.494057	0.13606	High_risk	-0.0914359
TCGA-86-7701-01	2.59452	0	1.74153	1.52797	0.633385	High_risk	-0.415357
TCGA-67-3770-01	1.67123	0	2.00745	0.776778	7.64573	Low_risk	-0.81953
TCGA-38-4629-01	2.36712	1	0.548042	0.780226	1.55591	High_risk	-0.249175
TCGA-55-6972-01	4.47123	1	0	0.220825	3.63689	High_risk	-0.256614
TCGA-MP-A4TA-01	2.60274	1	0.401521	2.01457	2.74825	High_risk	-0.437047
TCGA-50-5931-01	1.18904	1	0.314174	0.345396	0.611267	High_risk	-0.114147
TCGA-55-7994-01	1.65205	0	1.2765	1.76341	5.92318	Low_risk	-0.722322
TCGA-55-7724-01	1.93151	0	3.12403	1.76214	3.54291	Low_risk	-0.796987
TCGA-55-7725-01	1.21096	0	3.94997	1.38245	0.971148	Low_risk	-0.693844
TCGA-MP-A4SY-01	4.11233	1	2.1797	1.41462	0.138552	High_risk	-0.425689
TCGA-97-7546-01	3.52055	0	4.4286	1.65933	7.73568	Low_risk	-1.21607
TCGA-78-7154-01	1.62466	1	1.80496	0.88495	2.00364	High_risk	-0.443734
TCGA-73-4659-01	1.94795	1	1.66898	2.16989	3.26025	Low_risk	-0.642334
TCGA-50-5068-01	4.10685	1	1.53561	0.344942	1.39934	High_risk	-0.315157
TCGA-69-7980-01	1.12603	0	0.885887	1.42712	3.12103	High_risk	-0.459072
TCGA-73-7498-01	3.25753	0	2.9609	0.873498	6.87242	Low_risk	-0.897482
TCGA-86-8585-01	0.967123	0	1.13763	1.90935	1.07977	High_risk	-0.409593
TCGA-78-7542-01	0.879452	1	0.694301	0.634314	0.11929	High_risk	-0.159676
TCGA-05-4250-01	0.331507	1	0.996606	1.36446	0.865444	High_risk	-0.321347
TCGA-44-6776-01	7.16712	0	2.4312	0.279174	3.23795	Low_risk	-0.536619
TCGA-38-4630-01	2.93973	1	0.0392788	1.04565	3.47905	High_risk	-0.337776
TCGA-05-4418-01	0.750685	1	0.926379	0.63292	0.370611	High_risk	-0.204253
TCGA-55-8085-01	2.47671	0	0.295253	0.850639	1.26915	High_risk	-0.207006
TCGA-55-7995-01	2.43562	0	0.849038	1.63399	1.87653	High_risk	-0.396326
TCGA-55-7284-01	0.665753	1	2.59896	1.99548	4.42313	Low_risk	-0.813268
TCGA-55-6979-01	0.649315	1	1.67351	2.50782	5.25363	Low_risk	-0.806276
TCGA-62-A472-01	2.49315	0	3.44374	1.75459	0.436375	Low_risk	-0.636159
TCGA-55-8204-01	1.41096	0	1.97548	0.872001	0.325962	High_risk	-0.355686
TCGA-62-8398-01	1.21644	1	0.962882	0.664028	0.513592	High_risk	-0.221189
TCGA-MP-A4TI-01	1.17534	1	3.01653	2.20386	2.24948	Low_risk	-0.747013
TCGA-67-4679-01	1.2274	0	5.17457	2.27441	6.53199	Low_risk	-1.29517
TCGA-05-4390-01	3.08493	0	0.311271	1.36838	1.19005	High_risk	-0.258169
TCGA-44-8120-01	0.712329	0	2.48414	1.61589	7.13341	Low_risk	-0.933319
TCGA-O1-A52J-01	4.92603	1	1.26358	3.07423	8.40327	Low_risk	-1.01733
TCGA-67-6217-01	1.15616	0	2.44599	1.64718	7.41378	Low_risk	-0.949897
TCGA-55-5899-01	2.54795	0	0.914335	1.03837	0.617769	High_risk	-0.261133
TCGA-MP-A4TK-01	1.59452	1	1.08038	2.65143	1.90604	Low_risk	-0.533365
TCGA-MN-A4N4-01	3.21918	0	1.79306	1.30801	2.62148	Low_risk	-0.526274
TCGA-73-4666-01	2.19178	0	1.07375	1.27131	1.12426	High_risk	-0.337702
TCGA-L4-A4E6-01	1.19178	0	3.45194	3.99885	5.63821	Low_risk	-1.20633
TCGA-55-8207-01	2.67671	0	3.30442	0.977243	4.94235	Low_risk	-0.826776
TCGA-38-A44F-01	0.364384	0	3.30228	2.15753	4.99242	Low_risk	-0.953439
TCGA-78-7536-01	0.668493	1	0.210015	1.18745	0.339137	High_risk	-0.172108
TCGA-05-4389-01	3.75068	0	2.80087	0.833659	0.635708	High_risk	-0.47323
TCGA-55-7281-01	2.38904	0	1.02977	1.49042	6.23287	Low_risk	-0.683194
TCGA-97-7547-01	5.38356	0	2.38314	0.71308	2.48653	Low_risk	-0.527944
TCGA-62-8394-01	0.380822	1	1.23383	0.500496	4.85922	High_risk	-0.516391
TCGA-86-8668-01	1.1589	0	3.21459	1.39342	4.64274	Low_risk	-0.840097
TCGA-50-5939-01	1.26027	1	1.69742	1.15956	1.10581	High_risk	-0.401634
TCGA-38-7271-01	2.19178	1	3.52072	1.01714	2.93172	Low_risk	-0.728532
TCGA-49-AARQ-01	18.4438	0	0.466758	2.08093	4.21742	Low_risk	-0.546352
TCGA-64-1678-01	3.25753	0	0.0542233	0.399554	0.80488	High_risk	-0.100229
TCGA-49-AAR3-01	5.1863	0	0.282262	1.83617	0.116764	High_risk	-0.234729
TCGA-05-4395-01	0	1	0.548634	0.580821	0.0465609	High_risk	-0.131455
TCGA-44-A479-01	1.33151	0	0.686613	1.82269	0.734655	High_risk	-0.322794
TCGA-49-4514-01	4.65753	0	0.317999	0.533364	0.51662	High_risk	-0.128244
TCGA-62-A46S-01	4.52877	1	1.40703	1.16922	1.12862	High_risk	-0.368337
TCGA-55-A490-01	0.271233	1	0.661932	1.54932	0.110096	High_risk	-0.251007
TCGA-97-7938-01	0.0493151	1	3.29594	1.21655	8.69279	Low_risk	-1.09157
TCGA-55-8097-01	1.30411	0	3.83418	1.30859	7.12451	Low_risk	-1.06685
TCGA-55-8208-01	1.84658	0	2.06474	2.08723	2.46676	Low_risk	-0.631485
TCGA-69-7974-01	0.50411	0	2.34264	2.50024	4.11525	Low_risk	-0.814834
TCGA-55-6968-01	3.54247	1	0.195222	0.836328	1.37362	High_risk	-0.19989
TCGA-44-3917-01	3.2411	0	0.520246	1.6945	0.0848807	High_risk	-0.247151
TCGA-05-4415-01	0.249315	1	1.43733	0.771548	0.888461	High_risk	-0.314971
TCGA-44-6145-01	1.63014	0	2.66437	0.989648	1.86192	Low_risk	-0.551481
TCGA-44-7667-01	3.00548	0	0.267955	0.553852	0.200881	High_risk	-0.103958
TCGA-97-7553-01	5.12329	0	4.15325	3.00069	5.67096	Low_risk	-1.19021
TCGA-78-7150-01	1.82466	1	0.77947	0.451752	0.442121	High_risk	-0.171756
TCGA-69-7763-01	1.89041	0	1.46858	1.56808	5.39304	Low_risk	-0.691479
TCGA-95-7947-01	1.30685	0	1.40561	1.74015	2.67021	Low_risk	-0.526967
TCGA-55-8089-01	1.92329	1	1.25671	1.42395	1.07936	High_risk	-0.373358
TCGA-86-7711-01	2.86575	1	1.16935	1.28611	0.690551	High_risk	-0.323188
TCGA-55-8621-01	1.41096	0	3.65927	2.79728	5.06254	Low_risk	-1.06898
TCGA-49-4501-01	3.89315	1	2.89697	0.782241	2.17255	Low_risk	-0.578336
TCGA-L9-A8F4-01	1.30411	0	0.933119	1.37651	3.03437	High_risk	-0.454023
TCGA-86-7953-01	2.73151	0	0.675274	0.655535	1.27739	High_risk	-0.2339
TCGA-38-4628-01	4.08767	1	1.50218	0.698841	8.10369	Low_risk	-0.778515
TCGA-55-A48Y-01	1.72603	0	1.17696	0.324235	1.03619	High_risk	-0.245493
TCGA-MP-A4T9-01	3.46575	1	3.38546	3.54725	5.27045	Low_risk	-1.1272
TCGA-91-6835-01	0.216438	0	3.15311	2.07283	4.18411	Low_risk	-0.874296
TCGA-50-6590-01	3.52877	1	0.449641	1.60065	0	High_risk	-0.223167
TCGA-95-7039-01	3.48493	0	1.54681	1.01835	4.39605	Low_risk	-0.579494
TCGA-55-8206-01	2.43288	0	4.47628	3.23478	6.83946	Low_risk	-1.32955
TCGA-44-7661-01	1.52603	1	2.34812	2.6355	3.72665	Low_risk	-0.80474
TCGA-J2-A4AD-01	1.50685	1	1.94246	1.47804	1.51101	High_risk	-0.491214
TCGA-75-6206-01	7.09589	0	1.92018	1.65654	3.87945	Low_risk	-0.65922
TCGA-55-8616-01	0.131507	0	1.57046	1.00569	7.58976	Low_risk	-0.786099
TCGA-50-5051-01	1.30959	1	1.25114	1.05116	1.24215	High_risk	-0.344047
TCGA-97-A4M3-01	1.47945	0	0.895225	1.00662	3.17297	High_risk	-0.419481
TCGA-97-7552-01	5.29315	0	3.51419	1.36849	3.53292	Low_risk	-0.803147
TCGA-44-2657-01	3.70137	0	3.1146	0.791689	7.172	Low_risk	-0.927073
TCGA-97-8172-01	1.49315	0	4.5936	2.20311	1.26303	Low_risk	-0.877889
TCGA-91-6840-01	1.01918	0	1.61447	0.853756	1.93893	High_risk	-0.412844
TCGA-55-7907-01	0.939726	1	1.85834	1.07361	2.68894	High_risk	-0.514077
TCGA-49-4510-01	2.45479	1	0.683921	0.911653	7.02593	Low_risk	-0.630834
TCGA-MP-A4SV-01	7.17808	1	1.99899	1.80892	1.89511	Low_risk	-0.557517
TCGA-55-7726-01	1.7863	0	1.96636	1.66726	2.52298	Low_risk	-0.578954
TCGA-35-3615-01	0.0383562	0	1.88354	0.743817	1.01806	High_risk	-0.375353
TCGA-97-A4M6-01	1.55616	0	2.40196	1.96381	6.74552	Low_risk	-0.934762
TCGA-86-7955-01	2.93699	0	0.679784	0.215989	0.337197	High_risk	-0.128028
TCGA-L9-A443-01	0.528767	1	1.88037	1.94696	0.244035	High_risk	-0.451383
TCGA-53-7813-01	1.16164	0	0.495286	0.541416	0.355918	High_risk	-0.140612
TCGA-55-A491-01	1.71507	0	1.21798	0.928048	0.0742314	High_risk	-0.252083
TCGA-86-8056-01	0.380822	0	3.68565	2.07392	4.89234	Low_risk	-0.985479
TCGA-78-8655-01	6.46575	0	1.92296	1.05061	3.33146	Low_risk	-0.560872
TCGA-L9-A444-01	0.841096	0	1.43018	1.05429	6.00228	Low_risk	-0.672004
TCGA-86-8055-01	0.339726	1	1.97244	1.42239	1.67007	High_risk	-0.499285
TCGA-55-6970-01	1.27123	1	2.09251	1.10501	3.19357	Low_risk	-0.57861
TCGA-49-6745-01	1.43014	0	2.41633	2.11743	1.74889	Low_risk	-0.631879
TCGA-05-4405-01	1.67123	0	2.7037	2.92056	1.57483	Low_risk	-0.740289
TCGA-MP-A4TH-01	2.03014	0	2.12377	1.12816	1.41132	High_risk	-0.470476
TCGA-99-7458-01	2.04658	0	2.46611	0.893751	2.88901	Low_risk	-0.582938
TCGA-55-8508-01	1.69041	0	0.794603	0.227618	1.32222	High_risk	-0.206624
TCGA-55-1594-01	3.2274	0	0.871371	0.780058	1.83923	High_risk	-0.307176
TCGA-44-7669-01	1.5726	1	1.9957	1.5889	3.36899	Low_risk	-0.628665
TCGA-49-6742-01	1.33699	1	1.097	0.831391	3.04764	High_risk	-0.417926
TCGA-55-7913-01	1.53699	1	0.0676387	0.377401	0.177854	High_risk	-0.0593078
TCGA-86-6562-01	1.03014	1	2.67554	1.13947	3.95355	Low_risk	-0.702833
TCGA-95-7944-01	1.03288	0	0.458067	1.23113	1.39841	High_risk	-0.275242
TCGA-05-4398-01	3.92055	0	1.12062	1.67789	0.549817	High_risk	-0.349216
TCGA-78-7161-01	0.79726	1	0.737773	0.661294	0.625738	High_risk	-0.20037
TCGA-50-5933-01	6.55616	1	2.44784	2.6041	0.694301	Low_risk	-0.619074
TCGA-55-7728-01	1.92877	0	1.01757	2.63276	2.07451	Low_risk	-0.534484
TCGA-55-8087-01	1.26575	0	3.09495	0.54666	0.77703	High_risk	-0.488447
TCGA-91-7771-01	1.34795	0	1.74734	1.28297	2.54023	High_risk	-0.512801
TCGA-67-6216-01	0.386301	0	2.7733	1.35519	0.775683	Low_risk	-0.533484
TCGA-95-A4VP-01	1.65753	0	0.713168	0.968644	3.8758	High_risk	-0.43819
TCGA-73-4675-01	2.52603	1	1.43467	1.55361	0.581014	High_risk	-0.376879
TCGA-64-1676-01	4.73425	0	0.200379	2.11473	0.215989	High_risk	-0.26021
TCGA-55-6981-01	3.77808	1	2.76014	1.07444	2.35007	Low_risk	-0.603502
TCGA-75-5147-01	3.65205	0	2.54866	1.17913	3.36334	Low_risk	-0.65347
TCGA-L9-A7SV-01	1.54795	0	0.308128	1.20777	9.57031	Low_risk	-0.778913
TCGA-78-7160-01	1.90959	1	1.81693	1.81963	4.84752	Low_risk	-0.725739
TCGA-55-1595-01	4.05205	0	1.04831	2.26036	0.816968	High_risk	-0.41851
TCGA-62-8402-01	4.10411	1	0.154324	2.20129	0.0519985	High_risk	-0.253082
TCGA-78-8648-01	3.31233	1	2.07683	2.1121	3.23614	Low_risk	-0.684972
TCGA-44-3918-01	2.83836	0	3.36688	1.09689	0.906224	Low_risk	-0.587914
TCGA-55-A57B-01	1.49589	0	2.15173	2.10939	3.1795	Low_risk	-0.690278
TCGA-38-6178-01	1.2274	0	2.91747	2.04387	5.88631	Low_risk	-0.951504
TCGA-78-7535-01	2.6	1	0.157691	1.92265	1.57725	High_risk	-0.322203
TCGA-55-6986-01	8.93425	0	1.64423	1.13514	3.36057	Low_risk	-0.537265
TCGA-91-6849-01	0.0958904	0	0.532666	2.00299	1.45586	High_risk	-0.369025
TCGA-55-7903-01	1.55342	0	2.53916	1.29924	2.65444	Low_risk	-0.619382
TCGA-55-A493-01	0.0767123	0	0.855591	2.09761	0.317072	High_risk	-0.34562
TCGA-86-8280-01	1.92055	0	3.35009	0.745194	5.26044	Low_risk	-0.828497
TCGA-91-6828-01	0.884932	0	1.67161	2.52351	1.55537	Low_risk	-0.57028
TCGA-55-A48X-01	1.88767	0	2.57294	1.67184	5.3116	Low_risk	-0.833173
TCGA-50-5932-01	3.38356	1	0.958137	0.700617	7.33458	Low_risk	-0.662309
TCGA-NJ-A55O-01	0.0356164	0	1.62213	1.53923	3.67015	Low_risk	-0.596772
TCGA-05-5423-01	0.413699	0	2.51139	1.29007	9.02064	Low_risk	-1.02367
TCGA-05-5420-01	1.25205	0	1.26297	0.766638	0.536451	High_risk	-0.27038
TCGA-62-A46Y-01	1.13425	1	2.55029	2.24793	2.1173	Low_risk	-0.68571
TCGA-05-4384-01	1.16712	0	1.68536	2.0994	3.50858	Low_risk	-0.652903
TCGA-97-A4M1-01	1.64658	0	3.60857	2.45436	7.97651	Low_risk	-1.21385
TCGA-95-7567-01	1.55616	0	0.418568	0.814591	2.34693	High_risk	-0.287606
TCGA-55-7910-01	2.84932	0	1.04138	0.917623	0.54498	High_risk	-0.259455
TCGA-55-8619-01	1.13973	0	2.98158	2.65012	5.10081	Low_risk	-0.972522
TCGA-55-8302-01	1.30959	0	1.68594	1.39495	2.67624	Low_risk	-0.525706
TCGA-MN-A4N5-01	0.230137	0	0.699107	2.28561	2.76137	High_risk	-0.502959
TCGA-95-A4VK-01	1.78356	0	1.15672	1.15847	5.85422	Low_risk	-0.639731
TCGA-95-8494-01	0.230137	0	1.45943	1.70106	0	High_risk	-0.358088
TCGA-75-7027-01	8.38082	0	1.74459	0.944933	0.539233	High_risk	-0.348578
TCGA-64-5779-01	2.36712	0	1.02885	1.02027	0.999495	High_risk	-0.297848
TCGA-49-4505-01	1.1726	1	3.61507	0.296193	0.789771	Low_risk	-0.527087
TCGA-44-6775-01	1.93151	0	3.37721	2.04824	4.72543	Low_risk	-0.934075
TCGA-55-1592-01	1.92055	1	2.19959	1.85703	4.28582	Low_risk	-0.740742
TCGA-05-4397-01	2.00274	1	0.140517	0.77273	0.127105	High_risk	-0.106465
TCGA-44-2665-01	3.56438	0	3.601	2.17383	0.2163	Low_risk	-0.685347
TCGA-55-A48Z-01	1.78356	0	1.89829	2.09899	0.499578	High_risk	-0.485931
TCGA-86-8359-01	1.21644	1	0.581592	0.31371	0.551098	High_risk	-0.139906
TCGA-97-8547-01	1.8	0	1.65636	2.56718	0.1995	High_risk	-0.485938
TCGA-75-6212-01	4.15342	1	3.75412	0.884168	1.31301	Low_risk	-0.639434
TCGA-44-3396-01	3.09589	0	1.67554	0.704695	0.432104	High_risk	-0.308013
TCGA-86-8281-01	0	0	1.70757	1.36944	5.73377	Low_risk	-0.721972
TCGA-62-8397-01	3.53151	0	2.49978	1.01171	0.152508	High_risk	-0.423783
TCGA-J2-A4AG-01	2.70685	0	1.4105	1.79656	1.66517	High_risk	-0.468964
TCGA-78-7152-01	3.32877	1	1.11643	0.813607	0.325732	High_risk	-0.243723
TCGA-93-7348-01	1.45479	0	2.34854	1.01977	2.41048	Low_risk	-0.550946
TCGA-64-5775-01	0.169863	1	0.134221	1.40447	0	High_risk	-0.163747
TCGA-78-7153-01	9.9589	0	0.811553	0.552279	0	High_risk	-0.157864
TCGA-78-7149-01	10.7945	0	1.67523	0.148869	4.07193	High_risk	-0.48337
TCGA-MP-A4T8-01	0.441096	1	0.666302	1.06571	0.62686	High_risk	-0.234027
TCGA-44-2661-01	3.17534	0	4.21005	1.81217	2.83558	Low_risk	-0.890611
TCGA-73-4658-01	4.38356	1	1.46655	1.89662	1.20188	High_risk	-0.456617
TCGA-44-6778-01	5.10685	0	2.6107	2.65691	2.92966	Low_risk	-0.78817
TCGA-44-7670-01	2.41644	0	1.0446	0.575312	4.17798	High_risk	-0.45719
TCGA-55-8205-01	1.6411	0	2.11673	2.73112	1.01157	Low_risk	-0.611965
TCGA-55-8512-01	1.66301	1	1.90851	1.63245	4.54197	Low_risk	-0.697787
TCGA-55-8203-01	1.49863	0	0.843341	0.833416	1.59383	High_risk	-0.293563
TCGA-78-8660-01	0.879452	1	2.25487	1.70792	2.92277	Low_risk	-0.644422
TCGA-44-A47B-01	0.786301	0	2.92088	2.06409	0.910809	Low_risk	-0.634645
TCGA-50-5946-01	4.43014	0	1.19768	0.953749	2.0207	High_risk	-0.377229
TCGA-38-4631-01	0.969863	1	0.419107	0.207018	1.45507	High_risk	-0.166736
TCGA-64-5778-01	3.57534	0	0.329755	1.17607	1.9151	High_risk	-0.286833
TCGA-86-7954-01	1.65753	0	2.06481	2.82253	2.01785	Low_risk	-0.679749
TCGA-50-5066-01	3.95068	0	0.714311	0.468323	3.69589	High_risk	-0.37434
TCGA-55-6543-01	1.19178	0	2.33125	1.87153	3.56102	Low_risk	-0.711952
TCGA-73-7499-01	4.19452	1	0.765365	1.08406	0.82024	High_risk	-0.260569
TCGA-62-8399-01	7.3863	0	2.46801	1.56326	5.95173	Low_risk	-0.849958
TCGA-49-AAR0-01	13.0548	0	1.50508	1.35631	4.29666	Low_risk	-0.603397
TCGA-55-7283-01	1.66849	0	3.12869	0.98863	6.42191	Low_risk	-0.9013
TCGA-50-6593-01	0.920548	1	2.22555	2.38943	2.23915	Low_risk	-0.66836
TCGA-50-8459-01	3.06575	0	1.45796	3.23278	0.534759	Low_risk	-0.552786
TCGA-67-3774-01	1.05479	0	1.58828	1.42169	2.82554	Low_risk	-0.526062
TCGA-49-AAQV-01	1.85479	1	0.752663	1.18441	2.21642	High_risk	-0.359149
TCGA-38-4626-01	10.0658	0	2.77522	2.93015	5.19955	Low_risk	-0.982792
TCGA-95-7562-01	0.238356	1	0.704518	0.302524	0.0953168	High_risk	-0.124618
TCGA-69-7760-01	0.553425	0	0.577151	0.402395	7.88787	Low_risk	-0.619634
TCGA-71-8520-01	0.575342	1	2.09909	1.9779	0.653794	High_risk	-0.507876
TCGA-55-8614-01	1.46849	0	1.97004	0.535257	3.48634	Low_risk	-0.522597
TCGA-55-7574-01	2.72603	1	2.86281	1.51707	2.17402	Low_risk	-0.651245
TCGA-50-5935-01	1.78904	1	1.59407	0.77762	7.63677	Low_risk	-0.768119
TCGA-95-7043-01	1.37808	1	0.481092	0.134615	0.825786	High_risk	-0.126387
TCGA-97-7941-01	1.32603	0	2.9303	1.35766	3.7441	Low_risk	-0.743641
TCGA-44-7660-01	1.62192	0	0.161049	1.41533	2.01507	High_risk	-0.297546
TCGA-MP-A4T7-01	0.457534	1	1.23254	1.69417	4.03838	Low_risk	-0.588656
TCGA-55-6971-01	3.83562	0	2.21241	1.3055	2.834	Low_risk	-0.591314
TCGA-78-7155-01	3.20822	1	0.72561	0.550999	6.28165	Low_risk	-0.550389
TCGA-MP-A4TE-01	2.45479	1	0.115699	0.229588	0.456911	High_risk	-0.0676489
TCGA-95-A4VN-01	1.51507	0	2.07557	1.34891	2.7736	Low_risk	-0.575128
TCGA-93-8067-01	0.509589	0	0.737168	1.36121	2.25493	High_risk	-0.378243
TCGA-J2-8194-01	1.98356	0	0.56511	1.23603	2.81613	High_risk	-0.379953
TCGA-55-8510-01	1.47671	0	2.93717	1.51879	5.17268	Low_risk	-0.853082
TCGA-44-5643-01	2.77534	0	0.963696	0.867659	1.85754	High_risk	-0.328907
TCGA-86-7713-01	3.16986	0	0.476641	0.942383	3.28087	High_risk	-0.368108
TCGA-NJ-A55R-01	1.65205	0	2.02952	1.39917	1.0256	High_risk	-0.462512
TCGA-50-5044-01	1.70959	1	0.745539	1.52642	0.87688	High_risk	-0.308129
TCGA-64-5774-01	7.33151	0	0.332278	0.324235	0.088413	High_risk	-0.0805944
TCGA-55-6712-01	0.468493	1	2.72903	1.45607	6.64384	Low_risk	-0.915308
TCGA-44-2659-01	3.74521	0	2.94281	1.35084	8.22707	Low_risk	-1.03225
TCGA-4B-A93V-01	0.821918	1	0.0877344	0.0494914	0.860605	High_risk	-0.0712415
TCGA-86-8076-01	2.72055	0	2.23103	0.568129	2.61419	High_risk	-0.502207
TCGA-83-5908-01	2.25753	0	1.91613	2.27295	0.358059	High_risk	-0.497278
TCGA-44-A4SS-01	1.13699	0	1.81435	2.24674	0.158337	High_risk	-0.469171
TCGA-L4-A4E5-01	1.58356	0	1.14685	1.2419	1.89239	High_risk	-0.392934
TCGA-97-8171-01	1.55616	0	0.550704	0.679244	1.22404	High_risk	-0.217614
TCGA-93-A4JP-01	1.58356	0	4.25896	4.2709	7.42783	Low_risk	-1.44915
TCGA-S2-AA1A-01	1.40548	0	2.87643	0.864889	0.992261	High_risk	-0.508701
TCGA-55-6978-01	0.482192	1	2.64298	2.30483	0.288536	Low_risk	-0.585697
TCGA-78-7146-01	0.473973	1	1.23475	1.222	0.105008	High_risk	-0.286936
TCGA-MP-A4TD-01	0.841096	1	1.56262	1.59273	1.33365	High_risk	-0.445058
TCGA-50-5930-01	0.772603	1	0.377624	0.706729	0.81492	High_risk	-0.17291
TCGA-64-5781-01	4.27123	0	1.23462	0.413811	0	High_risk	-0.195468
TCGA-78-7159-01	5.40822	0	0.943209	0.970706	1.60094	High_risk	-0.320712
TCGA-69-8254-01	1.12055	0	1.89856	1.45575	3.92003	Low_risk	-0.638115
TCGA-50-7109-01	0.843836	1	1.14124	1.2375	1.79722	High_risk	-0.385672
TCGA-05-5428-01	1.83562	0	2.72836	0.940054	2.00259	Low_risk	-0.563196
TCGA-49-4512-01	2.47945	1	1.83552	1.92509	4.64815	Low_risk	-0.726285
TCGA-NJ-A4YP-01	0.136986	0	2.00281	1.46074	4.3172	Low_risk	-0.676977
TCGA-49-AAR2-01	6.09315	0	0.0285692	0.848638	1.68095	High_risk	-0.200379
TCGA-50-5045-01	5.95616	1	1.26855	1.27763	2.05908	High_risk	-0.422372
TCGA-44-8119-01	0.780822	0	0.640713	1.82081	0.197362	High_risk	-0.282451
TCGA-44-8117-01	1.05479	0	1.84165	1.43323	4.84866	Low_risk	-0.688356
TCGA-05-4425-01	1.83288	0	2.29746	0.934554	5.92522	Low_risk	-0.761347
TCGA-55-1596-01	5.65753	0	1.1271	0.951289	0.880019	High_risk	-0.295052
TCGA-91-6836-01	1.14247	0	1.33571	0.702746	0.0519985	High_risk	-0.241544
TCGA-49-4488-01	2.38082	1	0.667393	0.798507	3.21506	High_risk	-0.372302
TCGA-99-8032-01	0.120548	0	2.19601	0.998845	0.965323	High_risk	-0.437191
TCGA-49-6743-01	4.4411	0	1.67627	0.894604	1.18269	High_risk	-0.376192
TCGA-44-7662-01	0.59726	0	1.90639	1.57439	6.04017	Low_risk	-0.787617
TCGA-44-2655-01	3.6274	0	1.51687	1.04488	3.55286	Low_risk	-0.524459
TCGA-86-8673-01	2.36164	0	0.327457	1.32031	0.0503276	High_risk	-0.181962
TCGA-MP-A4TF-01	0.920548	1	1.15101	0.965618	0.896698	High_risk	-0.30057
TCGA-67-6215-01	0.476712	0	2.11843	0.765874	1.15678	High_risk	-0.415505
TCGA-55-7911-01	1.47123	0	1.57681	2.49426	1.63905	Low_risk	-0.560907
TCGA-75-6214-01	3.05479	1	0.316957	0.500598	2.9172	High_risk	-0.278785
TCGA-05-4244-01	0	0	1.24056	1.41743	1.53077	High_risk	-0.399663
TCGA-73-4677-01	0.10411	1	1.71053	0.19497	3.09618	High_risk	-0.429913
TCGA-97-7554-01	2.12329	0	2.08536	0.92448	1.92254	High_risk	-0.477213
TCGA-05-4426-01	2.16712	0	1.11962	0.757877	0.630219	High_risk	-0.257821
TCGA-97-8176-01	1.28219	1	0.553066	1.10548	1.51768	High_risk	-0.281432
TCGA-05-4382-01	1.66301	0	0.914641	1.51546	1.19459	High_risk	-0.348207
TCGA-J2-A4AE-01	2.95616	0	2.38405	2.70788	4.44702	Low_risk	-0.862997
TCGA-73-4670-01	0.358904	0	0.392427	0.88495	0.755657	High_risk	-0.18961
TCGA-55-8506-01	0.030137	0	2.51149	0.546561	3.36439	Low_risk	-0.582655
TCGA-50-6597-01	3.47397	1	0.597412	0.414352	10.4243	Low_risk	-0.786206
TCGA-44-3398-01	3.1863	0	2.38314	1.9052	3.51543	Low_risk	-0.718947
TCGA-50-6594-01	1.0137	1	0.5431	0.648926	0	High_risk	-0.134923
TCGA-73-A9RS-01	0.931507	1	1.26957	0.941707	0.564525	High_risk	-0.291345
TCGA-53-7626-01	2.54521	1	3.73403	0.762731	4.32387	Low_risk	-0.817511
TCGA-55-8505-01	1.20548	0	1.59946	0.995159	0.260748	High_risk	-0.318086
TCGA-97-A4M5-01	1.73699	0	3.46631	3.05586	5.29374	Low_risk	-1.08715
TCGA-75-5125-01	5.55342	1	2.58048	1.91865	0.488926	Low_risk	-0.550384
TCGA-62-A46U-01	5.66301	0	0.626392	2.59844	0.851199	High_risk	-0.404168
TCGA-MP-A4TJ-01	0.928767	1	1.97717	0.987103	3.40765	Low_risk	-0.565785
TCGA-62-A46V-01	6.02466	0	3.53297	1.36048	1.1139	Low_risk	-0.649334
TCGA-50-5055-01	5.0137	1	1.88671	0.649753	5.30359	Low_risk	-0.640989
TCGA-69-8453-01	2.2274	0	2.83437	2.68336	4.59408	Low_risk	-0.925342
TCGA-91-6829-01	3.44658	1	3.57934	1.63255	0.128821	Low_risk	-0.620328
