# Supplementary material for: Role of the membrane-spanning 4A gene family in lung adenocarcinoma
Source: Front Genet. 2023 Jul 18;14:1162787. doi: 10.3389/fgene.2023.1162787 (PMC10390740; doi:10.3389/fgene.2023.1162787)
Supplement: Supplementary file 2 [file Table3.XLSX]

## Sheet: Table S3
	times	status	MS4A14	MS4A15	MS4A2	MS4A7	Age	Gender	pT_stage	pN_stage	pM_stage	time
TCGA-35-5375-01	264	0	0.299831	0.383055	0.872711	3.60028	61	M	T2	N2	M0	264
TCGA-MP-A4T4-01	2617	1	2.34099	0.502738	2.31939	4.52889	68	F	T2	N1	M0	2617
TCGA-62-A471-01	1246	0	1.1141	0.876802	0.880568	2.12145	64	M	T2	N1	M0	1246
TCGA-L9-A5IP-01	58	1	0.649845	0	0.781821	3.28938	40	F	T3	N2	M1	58
TCGA-50-5936-01	257	1	1.37618	0.0802483	1.07936	3.97391	58	M	T2	N2	M0	257
TCGA-78-8662-01	3361	1	0.710702	6.82127	0.631058	3.26436	53	F	T2	N0	M0	3361
TCGA-05-4430-01	761	0	1.09559	5.17017	3.08926	5.00756	59	F	T2	N0	M0	761
TCGA-44-6146-01	728	0	0.698782	1.82329	2.07508	4.35798	64	M	T3	N0	M0	728
TCGA-05-4424-01	913	0	1.046	3.88232	2.63865	6.21693	70	M	T3	N0	M0	913
TCGA-62-A46P-01	594	1	0.687777	1.16169	1.04019	2.62176	65	M	T2	N0	M0	594
TCGA-38-4627-01	1147	1	0.83131	0.90512	2.98847	5.48907	64	F	T1	N1	M0	1147
TCGA-86-8073-01	740	0	2.63675	5.41256	3.3737	5.66304	58	M	T2	N0	M0	740
TCGA-55-6984-01	760	1	0.327112	1.54062	0.890096	2.26231	71	F	T2	N1	M0	760
TCGA-69-7764-01	414	0	0.907275	3.82452	1.35253	3.27865	75	M	T1	N0	M0	414
TCGA-NJ-A4YI-01	4	1	3.15835	0.62742	1.0467	5.64333	87	F	T2	N2	M0	4
TCGA-86-A4P7-01	415	0	3.06454	5.4828	3.2552	6.04343	63	F	T2	N0	M0	415
TCGA-55-8620-01	375	1	0.900258	1.173	0.663937	4.13709	60	M	T1	N1	M1	375
TCGA-97-8177-01	499	0	2.30241	5.73908	3.53874	5.32329	59	F	T2	N0	M0	499
TCGA-50-6595-01	189	1	1.4037	0.431569	0.666302	4.39682	74	F	T2	N2	M0	189
TCGA-78-7633-01	1528	1	0.399335	9.10227	1.11623	2.65366	67	M	T2	N0	M0	1528
TCGA-97-A4LX-01	614	0	2.48643	1.88143	2.66755	5.86438	81	M	T2	N0	M0	614
TCGA-78-7220-01	807	1	0.945533	1.1117	1.67843	3.5523	53	F	T2	N2	M0	807
TCGA-53-7624-01	1043	1	0.680684	1.34079	0.201132	2.22073	40	F	T2	N0	M1	1043
TCGA-62-A46R-01	1725	1	2.23177	0.95293	3.83177	4.99115	54	F	T2	N0	M0	1725
TCGA-78-7156-01	976	1	0.374956	4.88434	2.01396	2.32777	62	M	T4	N1	M1	976
TCGA-50-8457-01	1125	0	1.5853	6.87239	3.32507	4.40276	63	F	T1	N0	M0	1125
TCGA-NJ-A4YQ-01	1432	0	1.41164	2.55277	2.07919	4.00982	69	F	T1	N0	M0	1432
TCGA-50-5072-01	250	1	0.758133	2.35253	1.10286	4.10935	74	M	T2	N2	M0	250
TCGA-69-8255-01	129	0	1.05922	1.27715	0.363227	4.08642	71	M	T1	N0	M0	129
TCGA-86-A4D0-01	116	1	1.78165	0.921436	0.272859	3.44093	48	M	T2	N0	M0	116
TCGA-78-8640-01	7062	0	1.15186	2.87385	0.967169	3.88905	59	M	T1	N1	M0	7062
TCGA-97-8174-01	164	1	1.95315	4.73233	2.20445	5.54563	67	M	T2	N0	M0	164
TCGA-55-6987-01	2137	0	1.9558	1.31545	2.13875	4.68223	77	M	T1	N0	M0	2137
TCGA-44-7671-01	889	0	0.284277	0.419431	2.08726	3.83557	64	M	T2	N0	M0	889
TCGA-44-2662-01	1280	0	2.65825	0.18819	1.76507	5.58153	65	M	T2	N0	M0	1280
TCGA-93-A4JN-01	718	0	1.82093	2.40738	2.81787	3.95175	71	M	T2	N0	M1	718
TCGA-78-7158-01	179	1	1.16485	0.977536	2.55385	3.80352	59	F	T4	N2	M0	179
TCGA-44-4112-01	808	1	0.676719	0.780394	3.67378	4.83972	60	F	T2	N0	M0	808
TCGA-71-6725-01	256	0	1.54399	8.89557	0.349026	3.98162	48	F	T2	N0	M0	256
TCGA-44-2656-01	1429	0	2.5277	1.68527	3.53786	6.30651	59	M	T2	N0	M0	1429
TCGA-05-5715-01	62	0	3.10492	2.63345	2.55051	5.76776	69	F	T2	N0	M0	62
TCGA-64-5815-01	866	0	1.97556	1.27935	1.57768	4.92707	74	M	T2	N1	M0	866
TCGA-95-7948-01	476	0	0.734916	9.87051	1.29225	3.16588	42	F	T2	N0	M0	476
TCGA-05-4432-01	761	0	1.2032	3.93172	0.873183	4.23567	66	M	T2	N1	M0	761
TCGA-78-7143-01	4961	1	1.84647	0.87578	2.11547	4.45549	62	F	T2	N0	M0	4961
TCGA-73-4668-01	467	0	0.9568	4.4024	1.80476	3.83484	66	F	T2	N1	M0	467
TCGA-38-4625-01	2973	0	1.60141	2.24598	2.37551	5.37789	66	F	T2	N0	M0	2973
TCGA-86-6851-01	179	0	1.66134	6.62491	1.74476	4.65571	73	F	T1	N1	M0	179
TCGA-78-7537-01	1622	1	0.841812	0.248535	1.6364	3.21903	72	M	T2	N0	M0	1622
TCGA-05-4434-01	457	1	0.697151	5.58466	2.57848	4.89899	67	F	T4	N1	M1	457
TCGA-67-3773-01	427	0	0.931305	2.4936	3.8127	5.6338	84	F	T2	N0	M0	427
TCGA-55-6983-01	2823	0	1.22571	1.89829	2.04177	4.08378	81	M	T2	N1	M0	2823
TCGA-05-5425-01	882	0	0.66102	2.02176	1.22274	5.96561	68	M	T2	N1	M0	882
TCGA-97-A4M2-01	624	0	3.66644	5.4948	3.72883	6.23492	66	M	T1	N0	M0	624
TCGA-50-5941-01	1474	0	1.36036	2.84623	3.17698	4.42827	55	F	T2	N2	M0	1474
TCGA-78-7539-01	791	0	1.57507	8.39798	1.57202	5.22753	75	F	T2	N0	M0	791
TCGA-67-3771-01	610	0	2.05554	5.93625	0.660198	4.98254	77	F	T1	N0	M0	610
TCGA-05-5429-01	275	1	0.215244	0	1.48985	2.79346	60	M	T3	N2	M0	275
TCGA-86-A4JF-01	737	1	1.89836	5.41192	1.79967	4.636	56	M	T3	N0	M0	737
TCGA-97-8179-01	435	0	2.10735	2.72131	1.41116	4.54473	72	M	T1	N0	M0	435
TCGA-49-4490-01	385	1	2.06454	4.87775	1.49175	3.06645	45	F	T3	N2	M0	385
TCGA-55-8090-01	598	1	1.24957	2.0285	1.0795	4.31642	80	M	T1	N0	M0	598
TCGA-MP-A4TC-01	74	1	1.10796	2.84491	1.72984	3.84391	77	M	T1	N2	M0	74
TCGA-64-1681-01	1167	1	1.55562	6.95005	1.28812	4.00514	61	F	T1	N0	M0	1167
TCGA-99-AA5R-01	658	0	2.58019	6.13096	2.75009	5.61808	70	F	T1	N0	M0	658
TCGA-49-4486-01	2318	1	0.0724489	3.19322	0.0758749	1.87389	72	M	T1	N0	M0	2318
TCGA-05-4249-01	1523	0	0.771209	3.55681	3.84657	4.12043	67	M	T2	N0	M0	1523
TCGA-50-5049-01	3094	0	1.37718	4.76058	0.786764	5.62812	70	M	T2	N0	M0	3094
TCGA-86-8672-01	19	1	1.67138	2.27384	0.214125	3.82675	59	M	T3	N0	M0	19
TCGA-86-8674-01	806	0	0.278223	0.641639	0.0542233	1.19812	50	M	T2	N1	M0	806
TCGA-50-5942-01	1847	0	0.721766	1.38471	4.33974	3.34832	67	F	T1	N0	M0	1847
TCGA-69-A59K-01	591	0	1.5141	2.16835	0.886121	4.90211	60	F	T3	N0	M0	591
TCGA-44-2666-01	97	1	0.713637	1.98373	4.78485	3.48943	43	M	T2	N0	M0	97
TCGA-50-5944-01	1750	0	1.15969	5.5587	4.1698	4.97928	69	F	T1	N0	M0	1750
TCGA-50-6592-01	777	1	1.46978	1.16524	0.870029	4.33548	71	F	T2	N0	M0	777
TCGA-62-8395-01	1216	0	1.11636	6.21172	2.28777	4.18056	80	F	T3	N0	M0	1216
TCGA-05-4410-01	0	0	1.21456	1.52236	1.93832	4.45052	62	M	T2	N0	M0	0
TCGA-55-6975-01	118	1	0.353097	0	1.47166	3.11116	61	M	T2	N1	M0	118
TCGA-73-4662-01	2515	0	1.29572	3.95226	1.77985	4.97117	65	F	T1	N0	M0	2515
TCGA-44-A47G-01	351	0	2.08522	1.1356	1.89052	5.10496	73	F	T1	N0	M0	351
TCGA-NJ-A4YG-01	2261	0	3.15022	3.54405	2.0731	5.34292	65	M	T2	N0	M0	2261
TCGA-05-4433-01	730	0	1.89371	3.21801	2.21751	5.46204	82	M	T2	N0	M0	730
TCGA-49-4494-01	1081	1	0.394295	0.724301	0.406537	3.53593	77	M	T3	N2	M0	1081
TCGA-NJ-A7XG-01	617	0	0.958954	3.18539	1.6089	2.15847	49	M	T4	N1	M0	617
TCGA-44-6774-01	658	0	0.738725	4.97265	1.7946	3.87078	56	F	T1	N2	M0	658
TCGA-50-8460-01	829	0	1.23462	1.29572	3.54971	3.06903	74	M	T1	N0	M0	829
TCGA-44-2668-01	761	1	2.56974	0.333309	1.44858	5.34978	51	M	T2	N0	M0	761
TCGA-50-6673-01	22	1	0.82489	1.34045	1.58019	4.45321	84	F	T1	N0	M0	22
TCGA-50-6591-01	119	1	0.336169	0.206018	0	1.48579	63	F	T2	N0	M1	119
TCGA-78-7166-01	258	1	0.419215	0.551098	0.167101	1.14672	84	M	T2	N1	M0	258
TCGA-05-4427-01	791	0	1.76791	1.26766	1.192	4.93959	65	F	T2	N1	M0	791
TCGA-49-4487-01	855	1	1.36418	2.72544	0.528571	3.65408	72	F	T1	N0	M0	855
TCGA-73-4676-01	281	1	1.29131	2.51576	2.32152	4.97132	45	M	T2	N1	M0	281
TCGA-49-4507-01	268	1	1.50197	0.773828	0.839315	3.2055	73	F	T3	N1	M0	268
TCGA-78-7148-01	626	1	0.455649	1.16279	0.794936	3.12193	71	M	T2	N1	M0	626
TCGA-55-7576-01	670	0	0.751892	2.20777	2.35425	4.88472	54	M	T2	N0	M0	670
TCGA-55-6969-01	1239	0	1.27536	1.75933	1.20257	4.04136	52	M	T2	N0	M0	1239
TCGA-NJ-A4YF-01	2161	0	0.556895	1.18155	0.0984196	2.4716	50	F	T1	N0	M0	2161
TCGA-44-7672-01	719	0	1.04495	0.821057	1.0418	4.12204	52	F	T1	N0	M0	719
TCGA-78-7540-01	1197	1	0.612588	2.74859	0.32987	2.9506	66	F	T2	N0	M0	1197
TCGA-99-8028-01	1118	0	0.814427	3.38019	0.546956	4.83599	50	F	T1	N0	M0	1118
TCGA-64-1677-01	628	1	0.516822	1.91564	0.472384	2.29048	77	F	T2	N2	M0	628
TCGA-05-4403-01	578	0	0.431676	3.78962	1.51959	4.94516	76	M	T2	N0	M0	578
TCGA-44-6148-01	704	0	1.383	2.98714	4.35998	4.52043	60	M	T1	N0	M0	704
TCGA-55-6980-01	2109	0	1.79722	3.92419	1.90839	4.50543	56	M	T1	N0	M0	2109
TCGA-86-8278-01	944	0	1.53391	4.03081	2.96196	4.31299	63	F	T2	N1	M0	944
TCGA-78-7167-01	2681	1	0.269751	3.66389	1.77623	2.5593	77	M	T2	N0	M1	2681
TCGA-78-7147-01	586	1	1.37273	6.45897	2.18913	3.34585	67	F	T2	N1	M0	586
TCGA-97-A4M0-01	652	0	2.64418	1.69866	2.84115	4.91521	60	F	T2	N0	M0	652
TCGA-86-7714-01	625	1	1.54082	0.188654	2.25008	4.39667	61	F	T1	N2	M0	625
TCGA-64-1679-01	2488	0	1.86231	6.4964	1.64787	4.12184	58	F	T1	N2	M0	2488
TCGA-64-1680-01	1126	0	0.550704	0.668391	2.50287	3.96508	63	M	T2	N2	M1	1126
TCGA-86-8669-01	938	0	1.12055	1.11076	0.569588	3.82732	64	M	T1	N0	M0	938
TCGA-78-7145-01	826	1	1.47015	1.5141	2.93267	4.45906	52	F	T4	N1	M1	826
TCGA-86-8075-01	694	1	0.970044	4.71061	2.21226	4.6412	66	F	T2	N0	M0	694
TCGA-99-8025-01	1060	0	1.046	4.19302	0.806943	3.20257	72	F	T3	N2	M0	1060
TCGA-L9-A743-01	664	0	1.54374	1.90927	1.81873	4.71956	56	M	T2	N1	M0	664
TCGA-86-8054-01	1148	0	0.380508	2.92246	1.74739	3.6334	61	M	T2	N1	M0	1148
TCGA-55-8094-01	541	0	0.345623	1.38051	0.126048	2.1477	51	M	T2	N0	M1	541
TCGA-62-A470-01	1194	1	2.42766	3.2822	1.23186	5.18009	84	M	T2	N0	M0	1194
TCGA-86-A456-01	896	0	3.42601	9.34558	1.96691	5.92425	78	F	T1	N0	M0	896
TCGA-MP-A4SW-01	1778	1	2.02765	5.19471	2.15033	4.3963	53	M	T2	N1	M0	1778
TCGA-44-3919-01	1026	1	1.57937	3.41839	3.1018	4.69908	71	F	T1	N0	M0	1026
TCGA-69-7973-01	230	0	2.43352	4.34945	1.60212	5.52688	42	F	T2	N0	M0	230
TCGA-86-8671-01	839	0	2.17332	4.03472	2.86736	5.16002	72	F	T2	N1	M0	839
TCGA-67-3772-01	573	0	0.679424	4.8257	2.44	4.56374	82	F	T2	N0	M0	573
TCGA-35-4122-01	225	0	0.622274	1.24477	0.686075	4.53323	69	M	T1	N0	M0	225
TCGA-35-4123-01	182	0	1.1398	0.073409	2.07745	4.90425	38	M	T1	N0	M0	182
TCGA-55-6982-01	995	1	1.00691	6.5489	1.20708	4.7568	79	F	T2	N1	M0	995
TCGA-86-8279-01	949	0	0.989866	8.51767	0.412619	3.00978	46	M	T2	N1	M0	949
TCGA-05-4396-01	303	1	0.772646	0.082975	1.27858	3.23228	76	M	T4	N1	M0	303
TCGA-86-8358-01	653	0	1.8757	1.29319	0.825216	4.61479	44	M	T2	N0	M0	653
TCGA-78-7162-01	3169	1	0.882995	4.27654	3.21196	3.91982	75	M	T1	N0	M0	3169
TCGA-NJ-A55A-01	15	0	1.73031	4.11076	4.33634	4.50127	76	F	T2	N0	M0	15
TCGA-MN-A4N1-01	827	0	0.699107	2.40087	0.232047	2.24586	60	M	T2	N1	M0	827
TCGA-05-4422-01	365	0	1.48769	0.15095	0.164915	4.43907	68	M	T2	N0	M0	365
TCGA-49-4506-01	999	1	0.561204	0.193961	0.1125	3.70426	68	F	T2	N1	M0	999
TCGA-05-4417-01	455	0	1.08018	2.8989	1.56876	4.15894	51	F	T2	N0	M0	455
TCGA-62-A46O-01	1454	1	0.519944	1.14978	0.413269	2.1112	65	F	T2	N0	M0	1454
TCGA-MP-A5C7-01	2248	0	0.56774	1.08997	0.931154	2.64483	76	F	T2	N0	M0	2248
TCGA-86-8074-01	24	0	1.83107	2.13711	0.806778	4.52589	62	F	T1	N1	M0	24
TCGA-97-8175-01	551	0	2.02471	1.32947	0.98178	3.86017	55	F	T2	N0	M0	551
TCGA-97-A4M7-01	629	0	2.10427	1.52642	3.41262	4.66251	74	M	T1	N0	M0	629
TCGA-05-4420-01	912	0	0.183582	0.60521	0.27023	3.50724	41	M	T2	N0	M0	912
TCGA-38-4632-01	1357	1	0.879078	1.90931	1.44821	4.49915	42	M	T2	N1	M1	1357
TCGA-78-7163-01	7248	0	0.494057	0.13606	0.250962	1.38411	60	M	T2	N0	M0	7248
TCGA-86-7701-01	947	0	1.52797	0.633385	1.74153	4.52359	66	M	T2	N0	M1	947
TCGA-67-3770-01	610	0	0.776778	7.64573	2.00745	5.51566	70	F	T1	N0	M0	610
TCGA-38-4629-01	864	1	0.780226	1.55591	0.548042	4.59076	68	M	T3	N0	M0	864
TCGA-55-6972-01	1632	1	0.220825	3.63689	0	1.67622	72	M	T2	N0	M0	1632
TCGA-MP-A4TA-01	950	1	2.01457	2.74825	0.401521	4.27325	75	F	T1	N0	M0	950
TCGA-50-5931-01	434	1	0.345396	0.611267	0.314174	2.08485	75	F	T2	N0	M0	434
TCGA-MP-A4SY-01	1501	1	1.41462	0.138552	2.1797	5.39936	61	M	T2	N1	M0	1501
TCGA-78-7154-01	593	1	0.88495	2.00364	1.80496	3.93603	72	M	T3	N2	M0	593
TCGA-73-4659-01	711	1	2.16989	3.26025	1.66898	6.0961	66	M	T2	N2	M0	711
TCGA-69-7980-01	411	0	1.42712	3.12103	0.885887	5.10549	70	F	T1	N0	M0	411
TCGA-73-7498-01	1189	0	0.873498	6.87242	2.9609	4.3554	58	F	T1	N0	M0	1189
TCGA-86-8585-01	353	0	1.90935	1.07977	1.13763	4.03291	57	M	T2	N0	M0	353
TCGA-78-7542-01	321	1	0.634314	0.11929	0.694301	2.76163	56	M	T2	N0	M0	321
TCGA-05-4250-01	121	1	1.36446	0.865444	0.996606	4.64931	79	F	T3	N1	M0	121
TCGA-38-4630-01	1073	1	1.04565	3.47905	0.0392788	3.96841	75	F	T2	N0	M0	1073
TCGA-05-4418-01	274	1	0.63292	0.370611	0.926379	3.51682	69	M	T3	N2	M0	274
TCGA-55-8085-01	904	0	0.850639	1.26915	0.295253	3.80878	64	M	T1	N0	M0	904
TCGA-55-7995-01	889	0	1.63399	1.87653	0.849038	3.71205	73	F	T1	N0	M0	889
TCGA-55-6979-01	237	1	2.50782	5.25363	1.67351	5.35121	59	F	T2	N1	M0	237
TCGA-62-A472-01	910	0	1.75459	0.436375	3.44374	4.58517	70	M	T3	N0	M0	910
TCGA-62-8398-01	444	1	0.664028	0.513592	0.962882	3.25971	55	M	T2	N2	M0	444
TCGA-MP-A4TI-01	429	1	2.20386	2.24948	3.01653	5.12334	72	M	T2	N1	M0	429
TCGA-67-4679-01	448	0	2.27441	6.53199	5.17457	5.26184	69	M	T3	N0	M0	448
TCGA-05-4390-01	1126	0	1.36838	1.19005	0.311271	4.17051	58	F	T2	N0	M0	1126
TCGA-44-8120-01	260	0	1.61589	7.13341	2.48414	4.45813	58	M	T2	N0	M0	260
TCGA-67-6217-01	422	0	1.64718	7.41378	2.44599	4.74157	73	F	T2	N1	M0	422
TCGA-55-5899-01	930	0	1.03837	0.617769	0.914335	4.59897	58	M	T1	N1	M0	930
TCGA-MN-A4N4-01	1175	0	1.30801	2.62148	1.79306	3.73905	57	M	T1	N0	M0	1175
TCGA-73-4666-01	800	0	1.27131	1.12426	1.07375	5.52468	52	F	T1	N0	M1	800
TCGA-L4-A4E6-01	435	0	3.99885	5.63821	3.45194	7.50779	67	M	T1	N0	M0	435
TCGA-38-A44F-01	133	0	2.15753	4.99242	3.30228	5.20524	80	M	T2	N0	M0	133
TCGA-78-7536-01	244	1	1.18745	0.339137	0.210015	4.64424	69	M	T2	N2	M0	244
TCGA-05-4389-01	1369	0	0.833659	0.635708	2.80087	4.34403	70	M	T1	N0	M0	1369
TCGA-55-7281-01	872	0	1.49042	6.23287	1.02977	4.43779	70	F	T1	N0	M0	872
TCGA-62-8394-01	139	1	0.500496	4.85922	1.23383	3.31965	65	F	T4	N2	M0	139
TCGA-86-8668-01	423	0	1.39342	4.64274	3.21459	4.84481	61	F	T1	N0	M0	423
TCGA-50-5939-01	460	1	1.15956	1.10581	1.69742	4.79925	85	M	T2	N0	M0	460
TCGA-38-7271-01	800	1	1.01714	2.93172	3.52072	5.12685	72	F	T1	N0	M0	800
TCGA-64-1678-01	1189	0	0.399554	0.80488	0.0542233	2.52777	70	F	T2	N0	M0	1189
TCGA-05-4395-01	0	1	0.580821	0.0465609	0.548634	3.13105	76	M	T4	N2	M0	0
TCGA-49-4514-01	1700	0	0.533364	0.51662	0.317999	2.18222	79	F	T1	N0	M0	1700
TCGA-62-A46S-01	1653	1	1.16922	1.12862	1.40703	4.46903	73	M	T2	N0	M0	1653
TCGA-55-8208-01	674	0	2.08723	2.46676	2.06474	5.06478	73	F	T1	N0	M0	674
TCGA-55-6968-01	1293	1	0.836328	1.37362	0.195222	3.91245	61	M	T1	N0	M1	1293
TCGA-44-3917-01	1183	0	1.6945	0.0848807	0.520246	5.90401	33	F	T2	N0	M0	1183
TCGA-05-4415-01	91	1	0.771548	0.888461	1.43733	4.30845	57	M	T4	N2	M0	91
TCGA-44-6145-01	595	0	0.989648	1.86192	2.66437	4.89487	62	F	T1	N0	M0	595
TCGA-78-7150-01	666	1	0.451752	0.442121	0.77947	2.46955	59	M	T2	N1	M0	666
TCGA-69-7763-01	690	0	1.56808	5.39304	1.46858	4.60302	69	M	T1	N0	M0	690
TCGA-95-7947-01	477	0	1.74015	2.67021	1.40561	4.3047	67	M	T1	N0	M0	477
TCGA-55-8089-01	702	1	1.42395	1.07936	1.25671	5.48758	56	M	T1	N0	M0	702
TCGA-86-7711-01	1046	1	1.28611	0.690551	1.16935	4.73829	70	M	T2	N1	M0	1046
TCGA-49-4501-01	1421	1	0.782241	2.17255	2.89697	4.12457	67	F	T2	N0	M0	1421
TCGA-86-7953-01	997	0	0.655535	1.27739	0.675274	4.10503	69	F	T1	N0	M0	997
TCGA-38-4628-01	1492	1	0.698841	8.10369	1.50218	4.98876	65	F	T2	N1	M0	1492
TCGA-55-A48Y-01	630	0	0.324235	1.03619	1.17696	2.53062	69	M	T2	N0	M0	630
TCGA-91-6835-01	79	0	2.07283	4.18411	3.15311	6.22109	81	F	T1	N0	M0	79
TCGA-50-6590-01	1288	1	1.60065	0	0.449641	3.90332	72	F	T2	N0	M0	1288
TCGA-55-8206-01	888	0	3.23478	6.83946	4.47628	5.99028	56	M	T1	N0	M0	888
TCGA-44-7661-01	557	1	2.6355	3.72665	2.34812	5.61479	69	F	T2	N0	M0	557
TCGA-55-8616-01	48	0	1.00569	7.58976	1.57046	3.54903	58	F	T2	N0	M0	48
TCGA-50-5051-01	478	1	1.05116	1.24215	1.25114	2.6355	42	F	T2	N2	M0	478
TCGA-97-A4M3-01	540	0	1.00662	3.17297	0.895225	3.43003	69	F	T1	N0	M0	540
TCGA-97-8172-01	545	0	2.20311	1.26303	4.5936	5.62788	75	F	T2	N0	M0	545
TCGA-91-6840-01	372	0	0.853756	1.93893	1.61447	4.09641	59	F	T1	N0	M0	372
TCGA-49-4510-01	896	1	0.911653	7.02593	0.683921	3.65982	51	F	T2	N1	M0	896
TCGA-MP-A4SV-01	2620	1	1.80892	1.89511	1.99899	4.22527	67	M	T2	N0	M0	2620
TCGA-35-3615-01	14	0	0.743817	1.01806	1.88354	4.19122	57	M	T2	N0	M0	14
TCGA-97-A4M6-01	568	0	1.96381	6.74552	2.40196	5.1463	45	F	T1	N0	M0	568
TCGA-86-7955-01	1072	0	0.215989	0.337197	0.679784	1.03787	62	M	T2	N0	M0	1072
TCGA-53-7813-01	424	0	0.541416	0.355918	0.495286	1.66088	51	F	T4	N0	M0	424
TCGA-86-8056-01	139	0	2.07392	4.89234	3.68565	5.70534	63	F	T4	N0	M0	139
TCGA-78-8655-01	2360	0	1.05061	3.33146	1.92296	5.35283	77	F	T1	N0	M0	2360
TCGA-86-8055-01	124	1	1.42239	1.67007	1.97244	4.76544	79	M	T2	N1	M0	124
TCGA-49-6745-01	522	0	2.11743	1.74889	2.41633	5.1413	82	M	T2	N2	M0	522
TCGA-05-4405-01	610	0	2.92056	1.57483	2.7037	5.39288	74	F	T2	N0	M0	610
TCGA-MP-A4TH-01	741	0	1.12816	1.41132	2.12377	4.46779	70	F	T1	N0	M0	741
TCGA-99-7458-01	747	0	0.893751	2.88901	2.46611	5.32395	74	F	T4	N0	M0	747
TCGA-55-1594-01	1178	0	0.780058	1.83923	0.871371	4.57185	68	M	T2	N2	M0	1178
TCGA-49-6742-01	488	1	0.831391	3.04764	1.097	3.37664	70	M	T2	N1	M0	488
TCGA-86-6562-01	376	1	1.13947	3.95355	2.67554	4.95173	52	M	T2	N1	M0	376
TCGA-95-7944-01	377	0	1.23113	1.39841	0.458067	3.72202	71	M	T1	N0	M0	377
TCGA-05-4398-01	1431	0	1.67789	0.549817	1.12062	4.15185	47	F	T4	N3	M0	1431
TCGA-78-7161-01	291	1	0.661294	0.625738	0.737773	2.49633	69	F	T3	N0	M0	291
TCGA-50-5933-01	2393	1	2.6041	0.694301	2.44784	5.28981	72	M	T4	N2	M0	2393
TCGA-67-6216-01	141	0	1.35519	0.775683	2.7733	4.36888	57	F	T1	N0	M0	141
TCGA-95-A4VP-01	605	0	0.968644	3.8758	0.713168	2.96005	66	F	T2	N2	M0	605
TCGA-73-4675-01	922	1	1.55361	0.581014	1.43467	4.50054	59	M	T3	N1	M0	922
TCGA-64-1676-01	1728	0	2.11473	0.215989	0.200379	4.51979	58	M	T1	N0	M0	1728
TCGA-55-6981-01	1379	1	1.07444	2.35007	2.76014	3.40233	53	F	T1	N2	M0	1379
TCGA-L9-A7SV-01	565	0	1.20777	9.57031	0.308128	3.33937	69	M	T2	N1	M0	565
TCGA-78-7160-01	697	1	1.81963	4.84752	1.81693	5.62052	61	M	T4	N2	M1	697
TCGA-55-1595-01	1479	0	2.26036	0.816968	1.04831	4.74665	74	F	T1	N0	M0	1479
TCGA-62-8402-01	1498	1	2.20129	0.0519985	0.154324	4.80376	73	F	T2	N2	M0	1498
TCGA-78-8648-01	1209	1	2.1121	3.23614	2.07683	6.04626	58	F	T3	N0	M0	1209
TCGA-44-3918-01	1036	0	1.09689	0.906224	3.36688	5.37162	60	F	T1	N0	M0	1036
TCGA-55-A57B-01	546	0	2.10939	3.1795	2.15173	4.93086	80	F	T1	N0	M0	546
TCGA-78-7535-01	949	1	1.92265	1.57725	0.157691	4.17148	45	M	T2	N0	M0	949
TCGA-55-6986-01	3261	0	1.13514	3.36057	1.64423	4.74415	74	F	T2	N0	M0	3261
TCGA-55-A493-01	28	0	2.09761	0.317072	0.855591	3.85774	54	F	T2	N0	M0	28
TCGA-86-8280-01	701	0	0.745194	5.26044	3.35009	4.73329	54	F	T2	N0	M0	701
TCGA-91-6828-01	323	0	2.52351	1.55537	1.67161	5.94238	70	M	T1	N0	M0	323
TCGA-55-A48X-01	689	0	1.67184	5.3116	2.57294	4.06944	63	F	T1	N1	M0	689
TCGA-50-5932-01	1235	1	0.700617	7.33458	0.958137	4.24192	75	M	T2	N1	M0	1235
TCGA-NJ-A55O-01	13	0	1.53923	3.67015	1.62213	4.62859	56	F	T1	N1	M0	13
TCGA-05-5423-01	151	0	1.29007	9.02064	2.51139	6.0739	65	M	T2	N1	M0	151
TCGA-05-5420-01	457	0	0.766638	0.536451	1.26297	4.87469	67	M	T2	N2	M0	457
TCGA-62-A46Y-01	414	1	2.24793	2.1173	2.55029	5.54712	70	F	T2	N2	M0	414
TCGA-05-4384-01	426	0	2.0994	3.50858	1.68536	5.68816	66	M	T2	N2	M0	426
TCGA-97-A4M1-01	601	0	2.45436	7.97651	3.60857	5.26366	52	F	T1	N0	M0	601
TCGA-95-7567-01	568	0	0.814591	2.34693	0.418568	3.68316	61	M	T2	N1	M0	568
TCGA-55-7910-01	1040	0	0.917623	0.54498	1.04138	3.27474	50	F	T2	N0	M0	1040
TCGA-MN-A4N5-01	84	0	2.28561	2.76137	0.699107	4.79398	63	M	T1	N0	M0	84
TCGA-95-A4VK-01	651	0	1.15847	5.85422	1.15672	3.69645	74	F	T2	N2	M0	651
TCGA-95-8494-01	84	0	1.70106	0	1.45943	3.5499	67	M	T2	N1	M0	84
TCGA-64-5779-01	864	0	1.02027	0.999495	1.02885	2.92968	61	M	T2	N2	M0	864
TCGA-49-4505-01	428	1	0.296193	0.789771	3.61507	4.57156	61	F	T2	N1	M0	428
TCGA-55-1592-01	701	1	1.85703	4.28582	2.19959	5.42732	65	M	T2	N0	M0	701
TCGA-05-4397-01	731	1	0.77273	0.127105	0.140517	4.85723	65	M	T2	N1	M0	731
TCGA-44-2665-01	1301	0	2.17383	0.2163	3.601	5.57668	55	F	T2	N1	M0	1301
TCGA-86-8359-01	444	1	0.31371	0.551098	0.581592	2.62555	52	M	T3	N2	M0	444
TCGA-44-3396-01	1130	0	0.704695	0.432104	1.67554	4.47042	74	F	T2	N2	M0	1130
TCGA-62-8397-01	1289	0	1.01171	0.152508	2.49978	3.38246	70	F	T3	N0	M0	1289
TCGA-78-7152-01	1215	1	0.813607	0.325732	1.11643	3.81134	65	M	T2	N0	M0	1215
TCGA-64-5775-01	62	1	1.40447	0	0.134221	4.15097	71	M	T4	N0	M0	62
TCGA-78-7153-01	3635	0	0.552279	0	0.811553	2.13185	65	F	T2	N0	M0	3635
TCGA-78-7149-01	3940	0	0.148869	4.07193	1.67523	2.06836	71	M	T4	N0	M0	3940
TCGA-MP-A4T8-01	161	1	1.06571	0.62686	0.666302	2.77328	68	M	T2	N2	M0	161
TCGA-44-2661-01	1159	0	1.81217	2.83558	4.21005	5.55343	69	F	T1	N0	M0	1159
TCGA-73-4658-01	1600	1	1.89662	1.20188	1.46655	5.51648	80	F	T2	N0	M0	1600
TCGA-44-7670-01	882	0	0.575312	4.17798	1.0446	3.53963	47	F	T1	N1	M0	882
TCGA-55-8205-01	599	0	2.73112	1.01157	2.11673	6.17683	76	F	T2	N0	M0	599
TCGA-55-8512-01	607	1	1.63245	4.54197	1.90851	4.24989	41	M	T1	N1	M1	607
TCGA-55-8203-01	547	0	0.833416	1.59383	0.843341	3.052	69	F	T1	N0	M0	547
TCGA-78-8660-01	321	1	1.70792	2.92277	2.25487	4.19581	69	M	T2	N1	M0	321
TCGA-44-A47B-01	287	0	2.06409	0.910809	2.92088	4.95879	79	M	T2	N0	M0	287
TCGA-38-4631-01	354	1	0.207018	1.45507	0.419107	2.58513	72	F	T2	N0	M0	354
TCGA-64-5778-01	1305	0	1.17607	1.9151	0.329755	4.07918	60	M	T2	N0	M0	1305
TCGA-86-7954-01	605	0	2.82253	2.01785	2.06481	5.57383	68	F	T2	N0	M0	605
TCGA-50-5066-01	1442	0	0.468323	3.69589	0.714311	4.80352	72	M	T2	N0	M0	1442
TCGA-73-7499-01	1531	1	1.08406	0.82024	0.765365	4.17253	81	F	T2	N0	M0	1531
TCGA-62-8399-01	2696	0	1.56326	5.95173	2.46801	4.48835	62	M	T2	N2	M0	2696
TCGA-50-6593-01	336	1	2.38943	2.23915	2.22555	5.25209	49	F	T1	N2	M0	336
TCGA-50-8459-01	1119	0	3.23278	0.534759	1.45796	5.60718	68	M	T3	N0	M0	1119
TCGA-67-3774-01	385	0	1.42169	2.82554	1.58828	5.41665	73	F	T2	N0	M0	385
TCGA-38-4626-01	3674	0	2.93015	5.19955	2.77522	6.36349	57	F	T2	N0	M0	3674
TCGA-95-7562-01	87	1	0.302524	0.0953168	0.704518	2.88168	71	M	T2	N1	M0	87
TCGA-69-7760-01	202	0	0.402395	7.88787	0.577151	2.23949	73	M	T3	N0	M0	202
TCGA-71-8520-01	210	1	1.9779	0.653794	2.09909	4.68621	60	F	T2	N0	M0	210
TCGA-55-7574-01	995	1	1.51707	2.17402	2.86281	4.7277	64	F	T2	N0	M0	995
TCGA-50-5935-01	653	1	0.77762	7.63677	1.59407	3.55147	86	F	T1	N0	M0	653
TCGA-MP-A4T7-01	167	1	1.69417	4.03838	1.23254	4.91778	75	F	T2	N0	M1	167
TCGA-78-7155-01	1171	1	0.550999	6.28165	0.72561	4.23846	68	M	T2	N0	M0	1171
TCGA-95-A4VN-01	553	0	1.34891	2.7736	2.07557	4.24195	62	F	T2	N1	M0	553
TCGA-44-5643-01	1013	0	0.867659	1.85754	0.963696	3.36984	53	M	T2	N2	M0	1013
TCGA-86-7713-01	1157	0	0.942383	3.28087	0.476641	3.74846	70	M	T2	N0	M0	1157
TCGA-50-5044-01	624	1	1.52642	0.87688	0.745539	3.37984	72	F	T4	N1	M0	624
TCGA-64-5774-01	2676	0	0.324235	0.088413	0.332278	2.20192	60	M	T2	N0	M0	2676
TCGA-44-2659-01	1367	0	1.35084	8.22707	2.94281	4.31356	65	F	T1	N1	M0	1367
TCGA-4B-A93V-01	300	1	0.0494914	0.860605	0.0877344	1.57604	52	F	T1	N0	M0	300
TCGA-86-8076-01	993	0	0.568129	2.61419	2.23103	3.73264	42	M	T1	N0	M0	993
TCGA-83-5908-01	824	0	2.27295	0.358059	1.91613	4.94876	59	F	T1	N0	M0	824
TCGA-44-A4SS-01	415	0	2.24674	0.158337	1.81435	5.44368	73	M	T1	N0	M0	415
TCGA-L4-A4E5-01	578	0	1.2419	1.89239	1.14685	3.15787	48	F	T1	N0	M0	578
TCGA-97-8171-01	568	0	0.679244	1.22404	0.550704	2.27429	81	M	T2	N2	M1	568
TCGA-S2-AA1A-01	513	0	0.864889	0.992261	2.87643	3.57249	68	F	T1	N0	M0	513
TCGA-78-7146-01	173	1	1.222	0.105008	1.23475	3.3443	71	F	T2	N2	M0	173
TCGA-MP-A4TD-01	307	1	1.59273	1.33365	1.56262	3.41072	71	M	T2	N2	M0	307
TCGA-50-5930-01	282	1	0.706729	0.81492	0.377624	3.89368	47	M	T2	N2	M0	282
TCGA-64-5781-01	1559	0	0.413811	0	1.23462	2.79593	55	F	T2	N0	M0	1559
TCGA-50-7109-01	308	1	1.2375	1.79722	1.14124	4.84639	60	M	T1	N0	M0	308
TCGA-05-5428-01	670	0	0.940054	2.00259	2.72836	5.64471	57	M	T1	N1	M0	670
TCGA-NJ-A4YP-01	50	0	1.46074	4.3172	2.00281	4.34255	52	M	T2	N0	M0	50
TCGA-50-5045-01	2174	1	1.27763	2.05908	1.26855	5.31968	57	F	T2	N1	M0	2174
TCGA-44-8119-01	285	0	1.82081	0.197362	0.640713	5.15382	73	M	T3	N0	M0	285
TCGA-44-8117-01	385	0	1.43323	4.84866	1.84165	4.94784	54	F	T2	N0	M0	385
TCGA-05-4425-01	669	0	0.934554	5.92522	2.29746	4.80988	70	F	T2	N0	M1	669
TCGA-55-1596-01	2065	0	0.951289	0.880019	1.1271	3.54893	55	M	T2	N1	M0	2065
TCGA-99-8032-01	44	0	0.998845	0.965323	2.19601	3.37088	61	M	T1	N0	M0	44
TCGA-44-2655-01	1324	0	1.04488	3.55286	1.51687	3.92604	65	F	T1	N0	M0	1324
TCGA-86-8673-01	862	0	1.32031	0.0503276	0.327457	2.9124	61	M	T2	N0	M0	862
TCGA-MP-A4TF-01	336	1	0.965618	0.896698	1.15101	3.11116	58	F	T2	N0	M0	336
TCGA-67-6215-01	174	0	0.765874	1.15678	2.11843	5.04128	52	F	T2	N0	M0	174
TCGA-05-4244-01	0	0	1.41743	1.53077	1.24056	5.05131	70	M	T2	N2	M1	0
TCGA-73-4677-01	38	1	0.19497	3.09618	1.71053	3.84542	74	M	T2	N0	M0	38
TCGA-97-7554-01	775	0	0.92448	1.92254	2.08536	4.52189	83	F	T2	N2	M0	775
TCGA-05-4426-01	791	0	0.757877	0.630219	1.11962	3.40848	71	M	T2	N0	M0	791
TCGA-97-8176-01	468	1	1.10548	1.51768	0.553066	4.64064	63	M	T3	N1	M0	468
TCGA-05-4382-01	607	0	1.51546	1.19459	0.914641	5.17356	68	M	T2	N0	M0	607
TCGA-73-4670-01	131	0	0.88495	0.755657	0.392427	3.48623	69	F	T2	N0	M1	131
TCGA-50-6597-01	1268	1	0.414352	10.4243	0.597412	2.01639	79	F	T2	N0	M0	1268
TCGA-44-3398-01	1163	0	1.9052	3.51543	2.38314	5.8566	77	F	T1	N0	M0	1163
TCGA-50-6594-01	370	1	0.648926	0	0.5431	2.92355	79	F	T3	N2	M0	370
TCGA-73-A9RS-01	340	1	0.941707	0.564525	1.26957	3.32085	41	M	T3	N0	M0	340
TCGA-53-7626-01	929	1	0.762731	4.32387	3.73403	5.2218	76	F	T1	N1	M0	929
TCGA-97-A4M5-01	634	0	3.05586	5.29374	3.46631	5.64723	83	M	T1	N0	M0	634
TCGA-62-A46U-01	2067	0	2.59844	0.851199	0.626392	6.29109	71	F	T2	N1	M0	2067
TCGA-MP-A4TJ-01	339	1	0.987103	3.40765	1.97717	4.34416	62	F	T1	N0	M0	339
TCGA-62-A46V-01	2199	0	1.36048	1.1139	3.53297	4.49868	78	F	T2	N0	M0	2199
TCGA-50-5055-01	1830	1	0.649753	5.30359	1.88671	4.33914	79	F	T1	N1	M0	1830
