# Supplementary material for: Role of the membrane-spanning 4A gene family in lung adenocarcinoma
Source: Front Genet. 2023 Jul 18;14:1162787. doi: 10.3389/fgene.2023.1162787 (PMC10390740; doi:10.3389/fgene.2023.1162787)
Supplement: Supplementary file 7 [file Table4.XLSX]

## Sheet: Sheet1
GAPDH	F:5'-GGAGTCCACTGGCGTCTTCA-3'
	R:5'-GTCATGAGTCCTTCCACGATACC-3'
MS4A2	F:GGGGAACGGGAATTACCATCC
	R:GCACTACCAAGTCCCAGAATG
MS4A7	F:AGTGTCAGTTTAACAGGTGTCCT
	R:TCCCAGGGTTGTTGGAGTAGA
MS4A14	F:AGGTAGAGAATTTGTGCCAGATG
	R:TGTAGAGTCTAGCTGAATGGACA
MS4A15	F:TGTGGACAGGGGCTATCTGG
	R:GAAGTGCATGGCAATGACCG
