# Supplementary material for: Role of the membrane-spanning 4A gene family in lung adenocarcinoma
Source: Front Genet. 2023 Jul 18;14:1162787. doi: 10.3389/fgene.2023.1162787 (PMC10390740; doi:10.3389/fgene.2023.1162787)
Supplement: Supplementary file 8 [file Table1.XLSX]

## Sheet: Table 1
rownames(datas.final)	Type	Values	Group
1	MS4A1	2.75948	Tumor_G1
2	MS4A2	0.872711	Tumor_G1
3	MS4A3	0	Tumor_G1
4	MS4A4A	3.69774	Tumor_G1
5	MS4A4E	0.567351	Tumor_G1
6	MS4A5	0	Tumor_G1
7	MS4A6A	5.26651	Tumor_G1
8	MS4A6E	0	Tumor_G1
9	MS4A7	3.60028	Tumor_G1
10	MS4A8	0.12446	Tumor_G1
11	MS4A10	0	Tumor_G1
12	MS4A12	0	Tumor_G1
13	MS4A13	0	Tumor_G1
14	MS4A14	0.299831	Tumor_G1
15	MS4A15	0.383055	Tumor_G1
16	MS4A18	0	Tumor_G1
17	TMEM176A	5.21578	Tumor_G1
18	TMEM176B	6.90484	Tumor_G1
19	MS4A1	4.41982	Tumor_G1
20	MS4A2	1.15348	Tumor_G1
21	MS4A3	0.0522768	Tumor_G1
22	MS4A4A	4.62353	Tumor_G1
23	MS4A4E	0.713608	Tumor_G1
24	MS4A5	0	Tumor_G1
25	MS4A6A	4.5273	Tumor_G1
26	MS4A6E	0	Tumor_G1
27	MS4A7	4.63618	Tumor_G1
28	MS4A8	6.40374	Tumor_G1
29	MS4A10	0.377624	Tumor_G1
30	MS4A12	0.0590783	Tumor_G1
31	MS4A13	0	Tumor_G1
32	MS4A14	3.04747	Tumor_G1
33	MS4A15	7.03458	Tumor_G1
34	MS4A18	0.146916	Tumor_G1
35	TMEM176A	7.3832	Tumor_G1
36	TMEM176B	9.02628	Tumor_G1
37	MS4A1	2.82198	Tumor_G1
38	MS4A2	2.70244	Tumor_G1
39	MS4A3	0.0319597	Tumor_G1
40	MS4A4A	4.81354	Tumor_G1
41	MS4A4E	1.88076	Tumor_G1
42	MS4A5	0	Tumor_G1
43	MS4A6A	5.63699	Tumor_G1
44	MS4A6E	0.287118	Tumor_G1
45	MS4A7	4.95238	Tumor_G1
46	MS4A8	2.52361	Tumor_G1
47	MS4A10	0	Tumor_G1
48	MS4A12	0	Tumor_G1
49	MS4A13	0	Tumor_G1
50	MS4A14	1.36121	Tumor_G1
51	MS4A15	3.74689	Tumor_G1
52	MS4A18	0	Tumor_G1
53	TMEM176A	5.47204	Tumor_G1
54	TMEM176B	7.56872	Tumor_G1
55	MS4A1	2.96909	Tumor_G1
56	MS4A2	2.31939	Tumor_G1
57	MS4A3	0.0406821	Tumor_G1
58	MS4A4A	4.94429	Tumor_G1
59	MS4A4E	1.22737	Tumor_G1
60	MS4A5	0	Tumor_G1
61	MS4A6A	5.4936	Tumor_G1
62	MS4A6E	0.078883	Tumor_G1
63	MS4A7	4.52889	Tumor_G1
64	MS4A8	3.44132	Tumor_G1
65	MS4A10	0	Tumor_G1
66	MS4A12	0	Tumor_G1
67	MS4A13	0	Tumor_G1
68	MS4A14	2.34099	Tumor_G1
69	MS4A15	0.502738	Tumor_G1
70	MS4A18	0	Tumor_G1
71	TMEM176A	5.66171	Tumor_G1
72	TMEM176B	7.55171	Tumor_G1
73	MS4A1	2.25665	Tumor_G1
74	MS4A2	0.880568	Tumor_G1
75	MS4A3	0	Tumor_G1
76	MS4A4A	2.02545	Tumor_G1
77	MS4A4E	0.287827	Tumor_G1
78	MS4A5	0	Tumor_G1
79	MS4A6A	2.1865	Tumor_G1
80	MS4A6E	0	Tumor_G1
81	MS4A7	2.12145	Tumor_G1
82	MS4A8	0.15069	Tumor_G1
83	MS4A10	0	Tumor_G1
84	MS4A12	0	Tumor_G1
85	MS4A13	0	Tumor_G1
86	MS4A14	1.1141	Tumor_G1
87	MS4A15	0.876802	Tumor_G1
88	MS4A18	0	Tumor_G1
89	TMEM176A	3.26905	Tumor_G1
90	TMEM176B	4.644	Tumor_G1
91	MS4A1	0.286408	Tumor_G1
92	MS4A2	0.781821	Tumor_G1
93	MS4A3	0.082975	Tumor_G1
94	MS4A4A	3.46442	Tumor_G1
95	MS4A4E	0.227864	Tumor_G1
96	MS4A5	0	Tumor_G1
97	MS4A6A	3.62538	Tumor_G1
98	MS4A6E	0	Tumor_G1
99	MS4A7	3.28938	Tumor_G1
100	MS4A8	0.417812	Tumor_G1
101	MS4A10	0	Tumor_G1
102	MS4A12	0	Tumor_G1
103	MS4A13	0	Tumor_G1
104	MS4A14	0.649845	Tumor_G1
105	MS4A15	0	Tumor_G1
106	MS4A18	0	Tumor_G1
107	TMEM176A	3.9911	Tumor_G1
108	TMEM176B	5.55305	Tumor_G1
109	MS4A1	2.33571	Tumor_G1
110	MS4A2	1.07936	Tumor_G1
111	MS4A3	0	Tumor_G1
112	MS4A4A	4.60519	Tumor_G1
113	MS4A4E	0.125122	Tumor_G1
114	MS4A5	0	Tumor_G1
115	MS4A6A	4.28014	Tumor_G1
116	MS4A6E	0.799585	Tumor_G1
117	MS4A7	3.97391	Tumor_G1
118	MS4A8	0	Tumor_G1
119	MS4A10	0	Tumor_G1
120	MS4A12	0	Tumor_G1
121	MS4A13	0	Tumor_G1
122	MS4A14	1.37618	Tumor_G1
123	MS4A15	0.0802483	Tumor_G1
124	MS4A18	0	Tumor_G1
125	TMEM176A	5.84479	Tumor_G1
126	TMEM176B	7.34035	Tumor_G1
127	MS4A1	4.70296	Tumor_G1
128	MS4A2	2.75999	Tumor_G1
129	MS4A3	0	Tumor_G1
130	MS4A4A	4.54794	Tumor_G1
131	MS4A4E	1.29801	Tumor_G1
132	MS4A5	0	Tumor_G1
133	MS4A6A	4.12186	Tumor_G1
134	MS4A6E	0.265677	Tumor_G1
135	MS4A7	5.42973	Tumor_G1
136	MS4A8	8.00495	Tumor_G1
137	MS4A10	0.0437644	Tumor_G1
138	MS4A12	0	Tumor_G1
139	MS4A13	0	Tumor_G1
140	MS4A14	3.19571	Tumor_G1
141	MS4A15	3.64247	Tumor_G1
142	MS4A18	0	Tumor_G1
143	TMEM176A	4.94919	Tumor_G1
144	TMEM176B	6.4536	Tumor_G1
145	MS4A1	1.48774	Tumor_G1
146	MS4A2	0.631058	Tumor_G1
147	MS4A3	0	Tumor_G1
148	MS4A4A	2.63092	Tumor_G1
149	MS4A4E	0.288418	Tumor_G1
150	MS4A5	0	Tumor_G1
151	MS4A6A	2.37912	Tumor_G1
152	MS4A6E	0	Tumor_G1
153	MS4A7	3.26436	Tumor_G1
154	MS4A8	0.499578	Tumor_G1
155	MS4A10	0.499578	Tumor_G1
156	MS4A12	0	Tumor_G1
157	MS4A13	0	Tumor_G1
158	MS4A14	0.710702	Tumor_G1
159	MS4A15	6.82127	Tumor_G1
160	MS4A18	0.103263	Tumor_G1
161	TMEM176A	3.45863	Tumor_G1
162	TMEM176B	4.78553	Tumor_G1
163	MS4A1	2.03594	Tumor_G1
164	MS4A2	3.08926	Tumor_G1
165	MS4A3	0.129745	Tumor_G1
166	MS4A4A	5.36575	Tumor_G1
167	MS4A4E	0.748461	Tumor_G1
168	MS4A5	0	Tumor_G1
169	MS4A6A	6.03636	Tumor_G1
170	MS4A6E	0.405339	Tumor_G1
171	MS4A7	5.00756	Tumor_G1
172	MS4A8	5.06854	Tumor_G1
173	MS4A10	0.0302654	Tumor_G1
174	MS4A12	0	Tumor_G1
175	MS4A13	0	Tumor_G1
176	MS4A14	1.09559	Tumor_G1
177	MS4A15	5.17017	Tumor_G1
178	MS4A18	0.780562	Tumor_G1
179	TMEM176A	5.7845	Tumor_G1
180	TMEM176B	7.74474	Tumor_G1
181	MS4A1	4.24526	Tumor_G1
182	MS4A2	2.12555	Tumor_G1
183	MS4A3	0	Tumor_G1
184	MS4A4A	4.07994	Tumor_G1
185	MS4A4E	0.838266	Tumor_G1
186	MS4A5	0	Tumor_G1
187	MS4A6A	3.99055	Tumor_G1
188	MS4A6E	0.402831	Tumor_G1
189	MS4A7	4.21771	Tumor_G1
190	MS4A8	5.21028	Tumor_G1
191	MS4A10	1.90701	Tumor_G1
192	MS4A12	0	Tumor_G1
193	MS4A13	0	Tumor_G1
194	MS4A14	1.25598	Tumor_G1
195	MS4A15	8.98464	Tumor_G1
196	MS4A18	1.88479	Tumor_G1
197	TMEM176A	3.71266	Tumor_G1
198	TMEM176B	5.66297	Tumor_G1
199	MS4A1	0.953824	Tumor_G1
200	MS4A2	2.07508	Tumor_G1
201	MS4A3	0	Tumor_G1
202	MS4A4A	2.73983	Tumor_G1
203	MS4A4E	1.94054	Tumor_G1
204	MS4A5	0	Tumor_G1
205	MS4A6A	3.77465	Tumor_G1
206	MS4A6E	0	Tumor_G1
207	MS4A7	4.35798	Tumor_G1
208	MS4A8	1.62318	Tumor_G1
209	MS4A10	0	Tumor_G1
210	MS4A12	0.0821576	Tumor_G1
211	MS4A13	0.114056	Tumor_G1
212	MS4A14	0.698782	Tumor_G1
213	MS4A15	1.82329	Tumor_G1
214	MS4A18	0.0496308	Tumor_G1
215	TMEM176A	5.0826	Tumor_G1
216	TMEM176B	6.99366	Tumor_G1
217	MS4A1	0.392317	Tumor_G1
218	MS4A2	3.24901	Tumor_G1
219	MS4A3	0	Tumor_G1
220	MS4A4A	2.88786	Tumor_G1
221	MS4A4E	1.18485	Tumor_G1
222	MS4A5	0	Tumor_G1
223	MS4A6A	3.97538	Tumor_G1
224	MS4A6E	0.148609	Tumor_G1
225	MS4A7	3.19221	Tumor_G1
226	MS4A8	1.56774	Tumor_G1
227	MS4A10	0	Tumor_G1
228	MS4A12	0	Tumor_G1
229	MS4A13	0	Tumor_G1
230	MS4A14	0.814263	Tumor_G1
231	MS4A15	1.29684	Tumor_G1
232	MS4A18	0.111031	Tumor_G1
233	TMEM176A	4.56492	Tumor_G1
234	TMEM176B	6.27448	Tumor_G1
235	MS4A1	4.64574	Tumor_G1
236	MS4A2	2.87456	Tumor_G1
237	MS4A3	0.0639171	Tumor_G1
238	MS4A4A	4.07632	Tumor_G1
239	MS4A4E	1.63036	Tumor_G1
240	MS4A5	0	Tumor_G1
241	MS4A6A	4.89631	Tumor_G1
242	MS4A6E	0.236952	Tumor_G1
243	MS4A7	4.4218	Tumor_G1
244	MS4A8	6.00106	Tumor_G1
245	MS4A10	0	Tumor_G1
246	MS4A12	0	Tumor_G1
247	MS4A13	0	Tumor_G1
248	MS4A14	2.29907	Tumor_G1
249	MS4A15	1.4632	Tumor_G1
250	MS4A18	0	Tumor_G1
251	TMEM176A	5.12203	Tumor_G1
252	TMEM176B	6.94114	Tumor_G1
253	MS4A1	1.8808	Tumor_G1
254	MS4A2	2.63865	Tumor_G1
255	MS4A3	0.0603241	Tumor_G1
256	MS4A4A	5.53695	Tumor_G1
257	MS4A4E	1.03478	Tumor_G1
258	MS4A5	0.256407	Tumor_G1
259	MS4A6A	5.67275	Tumor_G1
260	MS4A6E	0.116498	Tumor_G1
261	MS4A7	6.21693	Tumor_G1
262	MS4A8	0.758815	Tumor_G1
263	MS4A10	0.0545012	Tumor_G1
264	MS4A12	0	Tumor_G1
265	MS4A13	0	Tumor_G1
266	MS4A14	1.046	Tumor_G1
267	MS4A15	3.88232	Tumor_G1
268	MS4A18	0.246104	Tumor_G1
269	TMEM176A	6.89176	Tumor_G1
270	TMEM176B	8.58292	Tumor_G1
271	MS4A1	1.23964	Tumor_G1
272	MS4A2	1.04019	Tumor_G1
273	MS4A3	0	Tumor_G1
274	MS4A4A	3.28112	Tumor_G1
275	MS4A4E	0.781318	Tumor_G1
276	MS4A5	0	Tumor_G1
277	MS4A6A	3.44802	Tumor_G1
278	MS4A6E	0.531269	Tumor_G1
279	MS4A7	2.62176	Tumor_G1
280	MS4A8	1.09498	Tumor_G1
281	MS4A10	0	Tumor_G1
282	MS4A12	0	Tumor_G1
283	MS4A13	0	Tumor_G1
284	MS4A14	0.687777	Tumor_G1
285	MS4A15	1.16169	Tumor_G1
286	MS4A18	0	Tumor_G1
287	TMEM176A	7.67205	Tumor_G1
288	TMEM176B	8.97766	Tumor_G1
289	MS4A1	1.45891	Tumor_G1
290	MS4A2	2.98847	Tumor_G1
291	MS4A3	0.0727232	Tumor_G1
292	MS4A4A	6.03206	Tumor_G1
293	MS4A4E	0.496718	Tumor_G1
294	MS4A5	0	Tumor_G1
295	MS4A6A	6.29283	Tumor_G1
296	MS4A6E	1.33777	Tumor_G1
297	MS4A7	5.48907	Tumor_G1
298	MS4A8	3.99493	Tumor_G1
299	MS4A10	0	Tumor_G1
300	MS4A12	0	Tumor_G1
301	MS4A13	0	Tumor_G1
302	MS4A14	0.83131	Tumor_G1
303	MS4A15	0.90512	Tumor_G1
304	MS4A18	0.104471	Tumor_G1
305	TMEM176A	6.84132	Tumor_G1
306	TMEM176B	8.41198	Tumor_G1
307	MS4A1	2.22259	Tumor_G1
308	MS4A2	3.3737	Tumor_G1
309	MS4A3	0.0699771	Tumor_G1
310	MS4A4A	5.00977	Tumor_G1
311	MS4A4E	2.22731	Tumor_G1
312	MS4A5	0	Tumor_G1
313	MS4A6A	5.83037	Tumor_G1
314	MS4A6E	0.19774	Tumor_G1
315	MS4A7	5.66304	Tumor_G1
316	MS4A8	2.54518	Tumor_G1
317	MS4A10	0.0938306	Tumor_G1
318	MS4A12	0	Tumor_G1
319	MS4A13	0	Tumor_G1
320	MS4A14	2.63675	Tumor_G1
321	MS4A15	5.41256	Tumor_G1
322	MS4A18	0.444879	Tumor_G1
323	TMEM176A	4.62622	Tumor_G1
324	TMEM176B	6.37387	Tumor_G1
325	MS4A1	3.65942	Tumor_G1
326	MS4A2	1.52567	Tumor_G1
327	MS4A3	0	Tumor_G1
328	MS4A4A	4.14696	Tumor_G1
329	MS4A4E	0.326422	Tumor_G1
330	MS4A5	0	Tumor_G1
331	MS4A6A	4.45248	Tumor_G1
332	MS4A6E	0	Tumor_G1
333	MS4A7	4.10402	Tumor_G1
334	MS4A8	0.560421	Tumor_G1
335	MS4A10	0.0499095	Tumor_G1
336	MS4A12	0	Tumor_G1
337	MS4A13	0	Tumor_G1
338	MS4A14	1.7455	Tumor_G1
339	MS4A15	1.95769	Tumor_G1
340	MS4A18	0	Tumor_G1
341	TMEM176A	5.54217	Tumor_G1
342	TMEM176B	8.00506	Tumor_G1
343	MS4A1	4.92508	Tumor_G1
344	MS4A2	3.57436	Tumor_G1
345	MS4A3	0.131107	Tumor_G1
346	MS4A4A	4.47605	Tumor_G1
347	MS4A4E	2.94657	Tumor_G1
348	MS4A5	0.14213	Tumor_G1
349	MS4A6A	5.6367	Tumor_G1
350	MS4A6E	0	Tumor_G1
351	MS4A7	5.40444	Tumor_G1
352	MS4A8	5.693	Tumor_G1
353	MS4A10	0.0292291	Tumor_G1
354	MS4A12	0.0366557	Tumor_G1
355	MS4A13	0	Tumor_G1
356	MS4A14	1.67986	Tumor_G1
357	MS4A15	1.65814	Tumor_G1
358	MS4A18	0	Tumor_G1
359	TMEM176A	4.80344	Tumor_G1
360	TMEM176B	6.477	Tumor_G1
361	MS4A1	3.88165	Tumor_G1
362	MS4A2	0.890096	Tumor_G1
363	MS4A3	0	Tumor_G1
364	MS4A4A	2.12661	Tumor_G1
365	MS4A4E	0.174662	Tumor_G1
366	MS4A5	0	Tumor_G1
367	MS4A6A	2.37239	Tumor_G1
368	MS4A6E	0.121281	Tumor_G1
369	MS4A7	2.26231	Tumor_G1
370	MS4A8	4.46003	Tumor_G1
371	MS4A10	0.111298	Tumor_G1
372	MS4A12	0	Tumor_G1
373	MS4A13	0	Tumor_G1
374	MS4A14	0.327112	Tumor_G1
375	MS4A15	1.54062	Tumor_G1
376	MS4A18	0	Tumor_G1
377	TMEM176A	5.23797	Tumor_G1
378	TMEM176B	7.05833	Tumor_G1
379	MS4A1	3.14882	Tumor_G1
380	MS4A2	1.35253	Tumor_G1
381	MS4A3	0	Tumor_G1
382	MS4A4A	3.53027	Tumor_G1
383	MS4A4E	2.84509	Tumor_G1
384	MS4A5	0	Tumor_G1
385	MS4A6A	3.80531	Tumor_G1
386	MS4A6E	0.238053	Tumor_G1
387	MS4A7	3.27865	Tumor_G1
388	MS4A8	0.970633	Tumor_G1
389	MS4A10	0.1137	Tumor_G1
390	MS4A12	0	Tumor_G1
391	MS4A13	0	Tumor_G1
392	MS4A14	0.907275	Tumor_G1
393	MS4A15	3.82452	Tumor_G1
394	MS4A18	0	Tumor_G1
395	TMEM176A	4.40607	Tumor_G1
396	TMEM176B	5.948	Tumor_G1
397	MS4A1	0.0990932	Tumor_G1
398	MS4A2	1.0467	Tumor_G1
399	MS4A3	0	Tumor_G1
400	MS4A4A	5.19994	Tumor_G1
401	MS4A4E	1.04208	Tumor_G1
402	MS4A5	0	Tumor_G1
403	MS4A6A	4.78262	Tumor_G1
404	MS4A6E	0.146525	Tumor_G1
405	MS4A7	5.64333	Tumor_G1
406	MS4A8	0.178874	Tumor_G1
407	MS4A10	0	Tumor_G1
408	MS4A12	0	Tumor_G1
409	MS4A13	0	Tumor_G1
410	MS4A14	3.15835	Tumor_G1
411	MS4A15	0.62742	Tumor_G1
412	MS4A18	0	Tumor_G1
413	TMEM176A	5.23524	Tumor_G1
414	TMEM176B	7.3913	Tumor_G1
415	MS4A1	4.50556	Tumor_G1
416	MS4A2	3.2552	Tumor_G1
417	MS4A3	0.214995	Tumor_G1
418	MS4A4A	5.42841	Tumor_G1
419	MS4A4E	1.83915	Tumor_G1
420	MS4A5	0	Tumor_G1
421	MS4A6A	5.31134	Tumor_G1
422	MS4A6E	2.31849	Tumor_G1
423	MS4A7	6.04343	Tumor_G1
424	MS4A8	2.76222	Tumor_G1
425	MS4A10	0.041243	Tumor_G1
426	MS4A12	0	Tumor_G1
427	MS4A13	0	Tumor_G1
428	MS4A14	3.06454	Tumor_G1
429	MS4A15	5.4828	Tumor_G1
430	MS4A18	0.506094	Tumor_G1
431	TMEM176A	5.64705	Tumor_G1
432	TMEM176B	7.18462	Tumor_G1
433	MS4A1	3.37661	Tumor_G1
434	MS4A2	0.663937	Tumor_G1
435	MS4A3	0	Tumor_G1
436	MS4A4A	3.96155	Tumor_G1
437	MS4A4E	0.412836	Tumor_G1
438	MS4A5	0	Tumor_G1
439	MS4A6A	3.9985	Tumor_G1
440	MS4A6E	0.219339	Tumor_G1
441	MS4A7	4.13709	Tumor_G1
442	MS4A8	5.97422	Tumor_G1
443	MS4A10	0.0531113	Tumor_G1
444	MS4A12	0.13014	Tumor_G1
445	MS4A13	0.179511	Tumor_G1
446	MS4A14	0.900258	Tumor_G1
447	MS4A15	1.173	Tumor_G1
448	MS4A18	0.0848807	Tumor_G1
449	TMEM176A	9.33134	Tumor_G1
450	TMEM176B	10.1972	Tumor_G1
451	MS4A1	3.36512	Tumor_G1
452	MS4A2	3.53874	Tumor_G1
453	MS4A3	0.146134	Tumor_G1
454	MS4A4A	5.45923	Tumor_G1
455	MS4A4E	0.897318	Tumor_G1
456	MS4A5	0	Tumor_G1
457	MS4A6A	5.30943	Tumor_G1
458	MS4A6E	0.171207	Tumor_G1
459	MS4A7	5.32329	Tumor_G1
460	MS4A8	1.28357	Tumor_G1
461	MS4A10	0.0807941	Tumor_G1
462	MS4A12	0	Tumor_G1
463	MS4A13	0	Tumor_G1
464	MS4A14	2.30241	Tumor_G1
465	MS4A15	5.73908	Tumor_G1
466	MS4A18	0.610228	Tumor_G1
467	TMEM176A	5.43286	Tumor_G1
468	TMEM176B	7.40422	Tumor_G1
469	MS4A1	0.440952	Tumor_G1
470	MS4A2	0.666302	Tumor_G1
471	MS4A3	0.14952	Tumor_G1
472	MS4A4A	5.34298	Tumor_G1
473	MS4A4E	0.161436	Tumor_G1
474	MS4A5	0.169155	Tumor_G1
475	MS4A6A	5.53365	Tumor_G1
476	MS4A6E	0.403377	Tumor_G1
477	MS4A7	4.39682	Tumor_G1
478	MS4A8	2.67812	Tumor_G1
479	MS4A10	0	Tumor_G1
480	MS4A12	0	Tumor_G1
481	MS4A13	0	Tumor_G1
482	MS4A14	1.4037	Tumor_G1
483	MS4A15	0.431569	Tumor_G1
484	MS4A18	0	Tumor_G1
485	TMEM176A	6.30085	Tumor_G1
486	TMEM176B	7.76401	Tumor_G1
487	MS4A1	0.698841	Tumor_G1
488	MS4A2	1.00079	Tumor_G1
489	MS4A3	0.0801119	Tumor_G1
490	MS4A4A	2.72023	Tumor_G1
491	MS4A4E	0.36614	Tumor_G1
492	MS4A5	0	Tumor_G1
493	MS4A6A	2.68495	Tumor_G1
494	MS4A6E	0.153805	Tumor_G1
495	MS4A7	2.6161	Tumor_G1
496	MS4A8	0.478817	Tumor_G1
497	MS4A10	0	Tumor_G1
498	MS4A12	0	Tumor_G1
499	MS4A13	0.125387	Tumor_G1
500	MS4A14	0.560617	Tumor_G1
501	MS4A15	0.973721	Tumor_G1
502	MS4A18	0.0586628	Tumor_G1
503	TMEM176A	8.80881	Tumor_G1
504	TMEM176B	10.3675	Tumor_G1
505	MS4A1	0.205393	Tumor_G1
506	MS4A2	1.11623	Tumor_G1
507	MS4A3	0.031254	Tumor_G1
508	MS4A4A	2.9917	Tumor_G1
509	MS4A4E	0.28889	Tumor_G1
510	MS4A5	0	Tumor_G1
511	MS4A6A	3.09295	Tumor_G1
512	MS4A6E	0.119423	Tumor_G1
513	MS4A7	2.65366	Tumor_G1
514	MS4A8	0.0990932	Tumor_G1
515	MS4A10	0.082975	Tumor_G1
516	MS4A12	0	Tumor_G1
517	MS4A13	0	Tumor_G1
518	MS4A14	0.399335	Tumor_G1
519	MS4A15	9.10227	Tumor_G1
520	MS4A18	1.18498	Tumor_G1
521	TMEM176A	5.50318	Tumor_G1
522	TMEM176B	7.59115	Tumor_G1
523	MS4A1	5.56717	Tumor_G1
524	MS4A2	2.66755	Tumor_G1
525	MS4A3	0	Tumor_G1
526	MS4A4A	5.71648	Tumor_G1
527	MS4A4E	2.03893	Tumor_G1
528	MS4A5	0	Tumor_G1
529	MS4A6A	6.27703	Tumor_G1
530	MS4A6E	0.169412	Tumor_G1
531	MS4A7	5.86438	Tumor_G1
532	MS4A8	2.12436	Tumor_G1
533	MS4A10	0	Tumor_G1
534	MS4A12	0	Tumor_G1
535	MS4A13	0	Tumor_G1
536	MS4A14	2.48643	Tumor_G1
537	MS4A15	1.88143	Tumor_G1
538	MS4A18	0	Tumor_G1
539	TMEM176A	6.55802	Tumor_G1
540	TMEM176B	8.49717	Tumor_G1
541	MS4A1	0.829931	Tumor_G1
542	MS4A2	1.67843	Tumor_G1
543	MS4A3	0	Tumor_G1
544	MS4A4A	3.55233	Tumor_G1
545	MS4A4E	0.48388	Tumor_G1
546	MS4A5	0.254836	Tumor_G1
547	MS4A6A	3.5472	Tumor_G1
548	MS4A6E	0.222928	Tumor_G1
549	MS4A7	3.5523	Tumor_G1
550	MS4A8	0.141694	Tumor_G1
551	MS4A10	0	Tumor_G1
552	MS4A12	0.0676387	Tumor_G1
553	MS4A13	0.0941009	Tumor_G1
554	MS4A14	0.945533	Tumor_G1
555	MS4A15	1.1117	Tumor_G1
556	MS4A18	0	Tumor_G1
557	TMEM176A	4.71682	Tumor_G1
558	TMEM176B	6.33047	Tumor_G1
559	MS4A1	1.5888	Tumor_G1
560	MS4A2	0.201132	Tumor_G1
561	MS4A3	0	Tumor_G1
562	MS4A4A	3.39223	Tumor_G1
563	MS4A4E	0.0411028	Tumor_G1
564	MS4A5	0	Tumor_G1
565	MS4A6A	3.10573	Tumor_G1
566	MS4A6E	0	Tumor_G1
567	MS4A7	2.22073	Tumor_G1
568	MS4A8	0	Tumor_G1
569	MS4A10	0	Tumor_G1
570	MS4A12	0.183836	Tumor_G1
571	MS4A13	0	Tumor_G1
572	MS4A14	0.680684	Tumor_G1
573	MS4A15	1.34079	Tumor_G1
574	MS4A18	0.081476	Tumor_G1
575	TMEM176A	6.38451	Tumor_G1
576	TMEM176B	7.37009	Tumor_G1
577	MS4A1	4.82547	Tumor_G1
578	MS4A2	1.37757	Tumor_G1
579	MS4A3	0	Tumor_G1
580	MS4A4A	2.55353	Tumor_G1
581	MS4A4E	0.728051	Tumor_G1
582	MS4A5	0	Tumor_G1
583	MS4A6A	3.6665	Tumor_G1
584	MS4A6E	0	Tumor_G1
585	MS4A7	3.24393	Tumor_G1
586	MS4A8	4.03741	Tumor_G1
587	MS4A10	0	Tumor_G1
588	MS4A12	0	Tumor_G1
589	MS4A13	0	Tumor_G1
590	MS4A14	0.938323	Tumor_G1
591	MS4A15	1.91778	Tumor_G1
592	MS4A18	0	Tumor_G1
593	TMEM176A	6.8017	Tumor_G1
594	TMEM176B	8.13021	Tumor_G1
595	MS4A1	3.24225	Tumor_G1
596	MS4A2	3.83177	Tumor_G1
597	MS4A3	0.412402	Tumor_G1
598	MS4A4A	4.82091	Tumor_G1
599	MS4A4E	1.49426	Tumor_G1
600	MS4A5	0	Tumor_G1
601	MS4A6A	4.78213	Tumor_G1
602	MS4A6E	1.32129	Tumor_G1
603	MS4A7	4.99115	Tumor_G1
604	MS4A8	3.23206	Tumor_G1
605	MS4A10	0	Tumor_G1
606	MS4A12	0	Tumor_G1
607	MS4A13	0	Tumor_G1
608	MS4A14	2.23177	Tumor_G1
609	MS4A15	0.95293	Tumor_G1
610	MS4A18	0	Tumor_G1
611	TMEM176A	4.86653	Tumor_G1
612	TMEM176B	6.70571	Tumor_G1
613	MS4A1	0.690194	Tumor_G1
614	MS4A2	2.01396	Tumor_G1
615	MS4A3	0.0619835	Tumor_G1
616	MS4A4A	2.31429	Tumor_G1
617	MS4A4E	0.465609	Tumor_G1
618	MS4A5	0	Tumor_G1
619	MS4A6A	2.8398	Tumor_G1
620	MS4A6E	0	Tumor_G1
621	MS4A7	2.32777	Tumor_G1
622	MS4A8	0	Tumor_G1
623	MS4A10	0	Tumor_G1
624	MS4A12	0	Tumor_G1
625	MS4A13	0	Tumor_G1
626	MS4A14	0.374956	Tumor_G1
627	MS4A15	4.88434	Tumor_G1
628	MS4A18	0.173255	Tumor_G1
629	TMEM176A	5.57555	Tumor_G1
630	TMEM176B	7.60393	Tumor_G1
631	MS4A1	4.6328	Tumor_G1
632	MS4A2	3.32507	Tumor_G1
633	MS4A3	0	Tumor_G1
634	MS4A4A	4.29956	Tumor_G1
635	MS4A4E	1.20527	Tumor_G1
636	MS4A5	0	Tumor_G1
637	MS4A6A	5.04529	Tumor_G1
638	MS4A6E	0.207518	Tumor_G1
639	MS4A7	4.40276	Tumor_G1
640	MS4A8	2.67645	Tumor_G1
641	MS4A10	0.098689	Tumor_G1
642	MS4A12	0	Tumor_G1
643	MS4A13	0	Tumor_G1
644	MS4A14	1.5853	Tumor_G1
645	MS4A15	6.87239	Tumor_G1
646	MS4A18	0.340619	Tumor_G1
647	TMEM176A	5.57062	Tumor_G1
648	TMEM176B	6.82289	Tumor_G1
649	MS4A1	0.295488	Tumor_G1
650	MS4A2	2.97735	Tumor_G1
651	MS4A3	0.760604	Tumor_G1
652	MS4A4A	5.97238	Tumor_G1
653	MS4A4E	0.729879	Tumor_G1
654	MS4A5	0	Tumor_G1
655	MS4A6A	5.74877	Tumor_G1
656	MS4A6E	0.329296	Tumor_G1
657	MS4A7	6.55196	Tumor_G1
658	MS4A8	1.32918	Tumor_G1
659	MS4A10	0	Tumor_G1
660	MS4A12	0	Tumor_G1
661	MS4A13	0	Tumor_G1
662	MS4A14	1.78048	Tumor_G1
663	MS4A15	3.91953	Tumor_G1
664	MS4A18	0.395282	Tumor_G1
665	TMEM176A	4.98089	Tumor_G1
666	TMEM176B	6.48982	Tumor_G1
667	MS4A1	2.93229	Tumor_G1
668	MS4A2	0.369494	Tumor_G1
669	MS4A3	0.0492125	Tumor_G1
670	MS4A4A	3.76462	Tumor_G1
671	MS4A4E	0.420617	Tumor_G1
672	MS4A5	0.0558898	Tumor_G1
673	MS4A6A	4.17859	Tumor_G1
674	MS4A6E	0.0485152	Tumor_G1
675	MS4A7	3.3295	Tumor_G1
676	MS4A8	0.225028	Tumor_G1
677	MS4A10	0	Tumor_G1
678	MS4A12	0	Tumor_G1
679	MS4A13	0	Tumor_G1
680	MS4A14	0.857185	Tumor_G1
681	MS4A15	0.130931	Tumor_G1
682	MS4A18	0	Tumor_G1
683	TMEM176A	6.41041	Tumor_G1
684	TMEM176B	8.35276	Tumor_G1
685	MS4A1	2.70657	Tumor_G1
686	MS4A2	1.65659	Tumor_G1
687	MS4A3	0.113967	Tumor_G1
688	MS4A4A	8.12912	Tumor_G1
689	MS4A4E	2.37568	Tumor_G1
690	MS4A5	0	Tumor_G1
691	MS4A6A	8.35358	Tumor_G1
692	MS4A6E	1.38946	Tumor_G1
693	MS4A7	7.15666	Tumor_G1
694	MS4A8	0.736994	Tumor_G1
695	MS4A10	0.0524159	Tumor_G1
696	MS4A12	0	Tumor_G1
697	MS4A13	0	Tumor_G1
698	MS4A14	2.97449	Tumor_G1
699	MS4A15	6.24634	Tumor_G1
700	MS4A18	0	Tumor_G1
701	TMEM176A	7.6388	Tumor_G1
702	TMEM176B	9.33921	Tumor_G1
703	MS4A1	5.46186	Tumor_G1
704	MS4A2	2.07919	Tumor_G1
705	MS4A3	0.0453032	Tumor_G1
706	MS4A4A	3.92614	Tumor_G1
707	MS4A4E	0.699019	Tumor_G1
708	MS4A5	0	Tumor_G1
709	MS4A6A	4.61336	Tumor_G1
710	MS4A6E	0.171079	Tumor_G1
711	MS4A7	4.00982	Tumor_G1
712	MS4A8	0.142217	Tumor_G1
713	MS4A10	0	Tumor_G1
714	MS4A12	0	Tumor_G1
715	MS4A13	0	Tumor_G1
716	MS4A14	1.41164	Tumor_G1
717	MS4A15	2.55277	Tumor_G1
718	MS4A18	0.301119	Tumor_G1
719	TMEM176A	4.68887	Tumor_G1
720	TMEM176B	7.08152	Tumor_G1
721	MS4A1	1.09173	Tumor_G1
722	MS4A2	1.10286	Tumor_G1
723	MS4A3	0	Tumor_G1
724	MS4A4A	4.58456	Tumor_G1
725	MS4A4E	0.229588	Tumor_G1
726	MS4A5	0	Tumor_G1
727	MS4A6A	4.09687	Tumor_G1
728	MS4A6E	0.343351	Tumor_G1
729	MS4A7	4.10935	Tumor_G1
730	MS4A8	0.660472	Tumor_G1
731	MS4A10	0	Tumor_G1
732	MS4A12	0.0546401	Tumor_G1
733	MS4A13	0	Tumor_G1
734	MS4A14	0.758133	Tumor_G1
735	MS4A15	2.35253	Tumor_G1
736	MS4A18	0.136323	Tumor_G1
737	TMEM176A	5.25655	Tumor_G1
738	TMEM176B	6.78371	Tumor_G1
739	MS4A1	0.649845	Tumor_G1
740	MS4A2	0.834711	Tumor_G1
741	MS4A3	0.128425	Tumor_G1
742	MS4A4A	4.50576	Tumor_G1
743	MS4A4E	0.381616	Tumor_G1
744	MS4A5	0	Tumor_G1
745	MS4A6A	4.75025	Tumor_G1
746	MS4A6E	0.126576	Tumor_G1
747	MS4A7	3.65298	Tumor_G1
748	MS4A8	0	Tumor_G1
749	MS4A10	0	Tumor_G1
750	MS4A12	0	Tumor_G1
751	MS4A13	0.102994	Tumor_G1
752	MS4A14	0.638398	Tumor_G1
753	MS4A15	0.0600474	Tumor_G1
754	MS4A18	0.0943712	Tumor_G1
755	TMEM176A	5.38602	Tumor_G1
756	TMEM176B	7.23316	Tumor_G1
757	MS4A1	1.63143	Tumor_G1
758	MS4A2	2.68089	Tumor_G1
759	MS4A3	0.0590783	Tumor_G1
760	MS4A4A	5.14272	Tumor_G1
761	MS4A4E	2.42766	Tumor_G1
762	MS4A5	0	Tumor_G1
763	MS4A6A	5.5314	Tumor_G1
764	MS4A6E	0.1141	Tumor_G1
765	MS4A7	5.48172	Tumor_G1
766	MS4A8	5.34884	Tumor_G1
767	MS4A10	0	Tumor_G1
768	MS4A12	0	Tumor_G1
769	MS4A13	0	Tumor_G1
770	MS4A14	2.18995	Tumor_G1
771	MS4A15	3.37068	Tumor_G1
772	MS4A18	0	Tumor_G1
773	TMEM176A	4.93005	Tumor_G1
774	TMEM176B	6.78217	Tumor_G1
775	MS4A1	2.71855	Tumor_G1
776	MS4A2	0.363227	Tumor_G1
777	MS4A3	0	Tumor_G1
778	MS4A4A	3.8895	Tumor_G1
779	MS4A4E	0.337426	Tumor_G1
780	MS4A5	0	Tumor_G1
781	MS4A6A	4.32948	Tumor_G1
782	MS4A6E	0.11929	Tumor_G1
783	MS4A7	4.08642	Tumor_G1
784	MS4A8	0	Tumor_G1
785	MS4A10	0	Tumor_G1
786	MS4A12	0	Tumor_G1
787	MS4A13	0	Tumor_G1
788	MS4A14	1.05922	Tumor_G1
789	MS4A15	1.27715	Tumor_G1
790	MS4A18	0	Tumor_G1
791	TMEM176A	6.60975	Tumor_G1
792	TMEM176B	7.76611	Tumor_G1
793	MS4A1	3.40742	Tumor_G1
794	MS4A2	0.714663	Tumor_G1
795	MS4A3	0	Tumor_G1
796	MS4A4A	3.75602	Tumor_G1
797	MS4A4E	0.440208	Tumor_G1
798	MS4A5	0	Tumor_G1
799	MS4A6A	3.40588	Tumor_G1
800	MS4A6E	1.39012	Tumor_G1
801	MS4A7	3.60765	Tumor_G1
802	MS4A8	1.25029	Tumor_G1
803	MS4A10	0	Tumor_G1
804	MS4A12	0	Tumor_G1
805	MS4A13	0	Tumor_G1
806	MS4A14	0.784336	Tumor_G1
807	MS4A15	4.24941	Tumor_G1
808	MS4A18	0.110631	Tumor_G1
809	TMEM176A	5.24007	Tumor_G1
810	TMEM176B	6.83402	Tumor_G1
811	MS4A1	0.89173	Tumor_G1
812	MS4A2	0.272859	Tumor_G1
813	MS4A3	0	Tumor_G1
814	MS4A4A	3.24452	Tumor_G1
815	MS4A4E	0.44869	Tumor_G1
816	MS4A5	0	Tumor_G1
817	MS4A6A	3.93186	Tumor_G1
818	MS4A6E	0	Tumor_G1
819	MS4A7	3.44093	Tumor_G1
820	MS4A8	6.56846	Tumor_G1
821	MS4A10	0.0751903	Tumor_G1
822	MS4A12	0	Tumor_G1
823	MS4A13	0	Tumor_G1
824	MS4A14	1.78165	Tumor_G1
825	MS4A15	0.921436	Tumor_G1
826	MS4A18	0.757194	Tumor_G1
827	TMEM176A	6.49562	Tumor_G1
828	TMEM176B	7.91531	Tumor_G1
829	MS4A1	1.2302	Tumor_G1
830	MS4A2	0.967169	Tumor_G1
831	MS4A3	0	Tumor_G1
832	MS4A4A	3.82071	Tumor_G1
833	MS4A4E	0.222928	Tumor_G1
834	MS4A5	0.121413	Tumor_G1
835	MS4A6A	3.42336	Tumor_G1
836	MS4A6E	0	Tumor_G1
837	MS4A7	3.88905	Tumor_G1
838	MS4A8	0.129349	Tumor_G1
839	MS4A10	0	Tumor_G1
840	MS4A12	0	Tumor_G1
841	MS4A13	0	Tumor_G1
842	MS4A14	1.15186	Tumor_G1
843	MS4A15	2.87385	Tumor_G1
844	MS4A18	0.153157	Tumor_G1
845	TMEM176A	4.90639	Tumor_G1
846	TMEM176B	6.49269	Tumor_G1
847	MS4A1	3.01696	Tumor_G1
848	MS4A2	2.20445	Tumor_G1
849	MS4A3	0.406101	Tumor_G1
850	MS4A4A	5.1771	Tumor_G1
851	MS4A4E	1.98768	Tumor_G1
852	MS4A5	0	Tumor_G1
853	MS4A6A	5.76081	Tumor_G1
854	MS4A6E	0.0565835	Tumor_G1
855	MS4A7	5.54563	Tumor_G1
856	MS4A8	0.547154	Tumor_G1
857	MS4A10	0.0771062	Tumor_G1
858	MS4A12	0	Tumor_G1
859	MS4A13	0	Tumor_G1
860	MS4A14	1.95315	Tumor_G1
861	MS4A15	4.73233	Tumor_G1
862	MS4A18	0.270947	Tumor_G1
863	TMEM176A	6.03567	Tumor_G1
864	TMEM176B	7.68747	Tumor_G1
865	MS4A1	4.9705	Tumor_G1
866	MS4A2	2.13875	Tumor_G1
867	MS4A3	0.0771062	Tumor_G1
868	MS4A4A	4.82079	Tumor_G1
869	MS4A4E	0.450697	Tumor_G1
870	MS4A5	0.129217	Tumor_G1
871	MS4A6A	4.76313	Tumor_G1
872	MS4A6E	0.0758749	Tumor_G1
873	MS4A7	4.68223	Tumor_G1
874	MS4A8	1.11597	Tumor_G1
875	MS4A10	0.0177794	Tumor_G1
876	MS4A12	0	Tumor_G1
877	MS4A13	0	Tumor_G1
878	MS4A14	1.9558	Tumor_G1
879	MS4A15	1.31545	Tumor_G1
880	MS4A18	0.0284277	Tumor_G1
881	TMEM176A	5.9873	Tumor_G1
882	TMEM176B	7.52981	Tumor_G1
883	MS4A1	2.81242	Tumor_G1
884	MS4A2	2.88251	Tumor_G1
885	MS4A3	0.092884	Tumor_G1
886	MS4A4A	5.39772	Tumor_G1
887	MS4A4E	0.542704	Tumor_G1
888	MS4A5	0	Tumor_G1
889	MS4A6A	5.29909	Tumor_G1
890	MS4A6E	0	Tumor_G1
891	MS4A7	4.85408	Tumor_G1
892	MS4A8	0.720016	Tumor_G1
893	MS4A10	0	Tumor_G1
894	MS4A12	0	Tumor_G1
895	MS4A13	0	Tumor_G1
896	MS4A14	1.06281	Tumor_G1
897	MS4A15	4.39212	Tumor_G1
898	MS4A18	0	Tumor_G1
899	TMEM176A	5.90856	Tumor_G1
900	TMEM176B	7.70531	Tumor_G1
901	MS4A1	2.64828	Tumor_G1
902	MS4A2	1.77812	Tumor_G1
903	MS4A3	0	Tumor_G1
904	MS4A4A	5.16531	Tumor_G1
905	MS4A4E	1.30445	Tumor_G1
906	MS4A5	0.0606008	Tumor_G1
907	MS4A6A	4.75419	Tumor_G1
908	MS4A6E	0.33308	Tumor_G1
909	MS4A7	5.00967	Tumor_G1
910	MS4A8	5.95489	Tumor_G1
911	MS4A10	0.0480967	Tumor_G1
912	MS4A12	0.146134	Tumor_G1
913	MS4A13	0.274411	Tumor_G1
914	MS4A14	2.49557	Tumor_G1
915	MS4A15	5.2933	Tumor_G1
916	MS4A18	0.775177	Tumor_G1
917	TMEM176A	5.61524	Tumor_G1
918	TMEM176B	7.39136	Tumor_G1
919	MS4A1	3.11831	Tumor_G1
920	MS4A2	3.39867	Tumor_G1
921	MS4A3	0.157691	Tumor_G1
922	MS4A4A	5.9074	Tumor_G1
923	MS4A4E	1.38001	Tumor_G1
924	MS4A5	0.144307	Tumor_G1
925	MS4A6A	5.99736	Tumor_G1
926	MS4A6E	0.295723	Tumor_G1
927	MS4A7	5.99997	Tumor_G1
928	MS4A8	3.10821	Tumor_G1
929	MS4A10	0.0297002	Tumor_G1
930	MS4A12	0	Tumor_G1
931	MS4A13	0	Tumor_G1
932	MS4A14	2.36241	Tumor_G1
933	MS4A15	2.83461	Tumor_G1
934	MS4A18	0.047678	Tumor_G1
935	TMEM176A	5.35728	Tumor_G1
936	TMEM176B	6.91644	Tumor_G1
937	MS4A1	1.07601	Tumor_G1
938	MS4A2	2.08726	Tumor_G1
939	MS4A3	0	Tumor_G1
940	MS4A4A	3.54371	Tumor_G1
941	MS4A4E	0.146525	Tumor_G1
942	MS4A5	0	Tumor_G1
943	MS4A6A	3.36411	Tumor_G1
944	MS4A6E	0	Tumor_G1
945	MS4A7	3.83557	Tumor_G1
946	MS4A8	4.4426	Tumor_G1
947	MS4A10	0.0316775	Tumor_G1
948	MS4A12	0	Tumor_G1
949	MS4A13	0	Tumor_G1
950	MS4A14	0.284277	Tumor_G1
951	MS4A15	0.419431	Tumor_G1
952	MS4A18	0.0997665	Tumor_G1
953	TMEM176A	7.42094	Tumor_G1
954	TMEM176B	9.6268	Tumor_G1
955	MS4A1	1.62908	Tumor_G1
956	MS4A2	1.76507	Tumor_G1
957	MS4A3	0.251042	Tumor_G1
958	MS4A4A	5.70499	Tumor_G1
959	MS4A4E	2.807	Tumor_G1
960	MS4A5	0.1145	Tumor_G1
961	MS4A6A	5.92253	Tumor_G1
962	MS4A6E	0.511907	Tumor_G1
963	MS4A7	5.58153	Tumor_G1
964	MS4A8	0.121944	Tumor_G1
965	MS4A10	0.477194	Tumor_G1
966	MS4A12	0.21938	Tumor_G1
967	MS4A13	0.299284	Tumor_G1
968	MS4A14	2.65825	Tumor_G1
969	MS4A15	0.18819	Tumor_G1
970	MS4A18	0.396306	Tumor_G1
971	TMEM176A	4.71368	Tumor_G1
972	TMEM176B	6.43465	Tumor_G1
973	MS4A1	5.0159	Tumor_G1
974	MS4A2	2.81787	Tumor_G1
975	MS4A3	0.128425	Tumor_G1
976	MS4A4A	3.94001	Tumor_G1
977	MS4A4E	1.44753	Tumor_G1
978	MS4A5	0	Tumor_G1
979	MS4A6A	4.62809	Tumor_G1
980	MS4A6E	0.242938	Tumor_G1
981	MS4A7	3.95175	Tumor_G1
982	MS4A8	0.769518	Tumor_G1
983	MS4A10	0.0398403	Tumor_G1
984	MS4A12	0	Tumor_G1
985	MS4A13	0	Tumor_G1
986	MS4A14	1.82093	Tumor_G1
987	MS4A15	2.40738	Tumor_G1
988	MS4A18	0	Tumor_G1
989	TMEM176A	5.23841	Tumor_G1
990	TMEM176B	6.89441	Tumor_G1
991	MS4A1	0.0721744	Tumor_G1
992	MS4A2	0.101919	Tumor_G1
993	MS4A3	0	Tumor_G1
994	MS4A4A	2.36449	Tumor_G1
995	MS4A4E	0.359409	Tumor_G1
996	MS4A5	0.123269	Tumor_G1
997	MS4A6A	3.33908	Tumor_G1
998	MS4A6E	0	Tumor_G1
999	MS4A7	2.87945	Tumor_G1
1000	MS4A8	0	Tumor_G1
1001	MS4A10	0.0500489	Tumor_G1
1002	MS4A12	0	Tumor_G1
1003	MS4A13	0	Tumor_G1
1004	MS4A14	0.513188	Tumor_G1
1005	MS4A15	0.0994972	Tumor_G1
1006	MS4A18	0	Tumor_G1
1007	TMEM176A	4.86316	Tumor_G1
1008	TMEM176B	6.64863	Tumor_G1
1009	MS4A1	3.12123	Tumor_G1
1010	MS4A2	4.08126	Tumor_G1
1011	MS4A3	0.0969365	Tumor_G1
1012	MS4A4A	5.8345	Tumor_G1
1013	MS4A4E	2.63127	Tumor_G1
1014	MS4A5	0	Tumor_G1
1015	MS4A6A	6.3607	Tumor_G1
1016	MS4A6E	0.969233	Tumor_G1
1017	MS4A7	7.27888	Tumor_G1
1018	MS4A8	3.31129	Tumor_G1
1019	MS4A10	0	Tumor_G1
1020	MS4A12	0	Tumor_G1
1021	MS4A13	0	Tumor_G1
1022	MS4A14	3.99843	Tumor_G1
1023	MS4A15	6.72339	Tumor_G1
1024	MS4A18	0.489235	Tumor_G1
1025	TMEM176A	5.92288	Tumor_G1
1026	TMEM176B	7.4434	Tumor_G1
1027	MS4A1	0.414893	Tumor_G1
1028	MS4A2	2.55385	Tumor_G1
1029	MS4A3	0	Tumor_G1
1030	MS4A4A	3.43371	Tumor_G1
1031	MS4A4E	0.468635	Tumor_G1
1032	MS4A5	0	Tumor_G1
1033	MS4A6A	3.82648	Tumor_G1
1034	MS4A6E	0.177344	Tumor_G1
1035	MS4A7	3.80352	Tumor_G1
1036	MS4A8	0.312897	Tumor_G1
1037	MS4A10	0.0425043	Tumor_G1
1038	MS4A12	0.0532504	Tumor_G1
1039	MS4A13	0	Tumor_G1
1040	MS4A14	1.16485	Tumor_G1
1041	MS4A15	0.977536	Tumor_G1
1042	MS4A18	0	Tumor_G1
1043	TMEM176A	3.83763	Tumor_G1
1044	TMEM176B	5.32342	Tumor_G1
1045	MS4A1	1.59598	Tumor_G1
1046	MS4A2	1.43419	Tumor_G1
1047	MS4A3	0.0666748	Tumor_G1
1048	MS4A4A	5.43347	Tumor_G1
1049	MS4A4E	0.62938	Tumor_G1
1050	MS4A5	0.147567	Tumor_G1
1051	MS4A6A	5.58338	Tumor_G1
1052	MS4A6E	0.128557	Tumor_G1
1053	MS4A7	3.78468	Tumor_G1
1054	MS4A8	0.757194	Tumor_G1
1055	MS4A10	0.0601858	Tumor_G1
1056	MS4A12	0.0751903	Tumor_G1
1057	MS4A13	0	Tumor_G1
1058	MS4A14	1.37723	Tumor_G1
1059	MS4A15	4.92735	Tumor_G1
1060	MS4A18	0	Tumor_G1
1061	TMEM176A	5.73472	Tumor_G1
1062	TMEM176B	7.93169	Tumor_G1
1063	MS4A1	3.01857	Tumor_G1
1064	MS4A2	3.67378	Tumor_G1
1065	MS4A3	0	Tumor_G1
1066	MS4A4A	4.90211	Tumor_G1
1067	MS4A4E	1.79639	Tumor_G1
1068	MS4A5	0.0966667	Tumor_G1
1069	MS4A6A	5.01201	Tumor_G1
1070	MS4A6E	0.610747	Tumor_G1
1071	MS4A7	4.83972	Tumor_G1
1072	MS4A8	0.988739	Tumor_G1
1073	MS4A10	0.0183493	Tumor_G1
1074	MS4A12	0.200567	Tumor_G1
1075	MS4A13	0	Tumor_G1
1076	MS4A14	0.676719	Tumor_G1
1077	MS4A15	0.780394	Tumor_G1
1078	MS4A18	0.0623981	Tumor_G1
1079	TMEM176A	4.17382	Tumor_G1
1080	TMEM176B	6.08464	Tumor_G1
1081	MS4A1	0.402504	Tumor_G1
1082	MS4A2	0.349026	Tumor_G1
1083	MS4A3	0.0612923	Tumor_G1
1084	MS4A4A	3.80699	Tumor_G1
1085	MS4A4E	0.427392	Tumor_G1
1086	MS4A5	0	Tumor_G1
1087	MS4A6A	4.13488	Tumor_G1
1088	MS4A6E	0.118227	Tumor_G1
1089	MS4A7	3.98162	Tumor_G1
1090	MS4A8	1.50899	Tumor_G1
1091	MS4A10	0.0278618	Tumor_G1
1092	MS4A12	0	Tumor_G1
1093	MS4A13	0	Tumor_G1
1094	MS4A14	1.54399	Tumor_G1
1095	MS4A15	8.89557	Tumor_G1
1096	MS4A18	2.12806	Tumor_G1
1097	TMEM176A	2.70175	Tumor_G1
1098	TMEM176B	4.10038	Tumor_G1
1099	MS4A1	3.42255	Tumor_G1
1100	MS4A2	3.53786	Tumor_G1
1101	MS4A3	0.0990034	Tumor_G1
1102	MS4A4A	5.46002	Tumor_G1
1103	MS4A4E	2.61924	Tumor_G1
1104	MS4A5	0	Tumor_G1
1105	MS4A6A	6.22715	Tumor_G1
1106	MS4A6E	0.354038	Tumor_G1
1107	MS4A7	6.30651	Tumor_G1
1108	MS4A8	0.562572	Tumor_G1
1109	MS4A10	0.0410093	Tumor_G1
1110	MS4A12	0.00968159	Tumor_G1
1111	MS4A13	0.0135456	Tumor_G1
1112	MS4A14	2.5277	Tumor_G1
1113	MS4A15	1.68527	Tumor_G1
1114	MS4A18	0.0246979	Tumor_G1
1115	TMEM176A	4.53424	Tumor_G1
1116	TMEM176B	6.68943	Tumor_G1
1117	MS4A1	1.37995	Tumor_G1
1118	MS4A2	2.55051	Tumor_G1
1119	MS4A3	0	Tumor_G1
1120	MS4A4A	5.54931	Tumor_G1
1121	MS4A4E	0.267955	Tumor_G1
1122	MS4A5	0.716684	Tumor_G1
1123	MS4A6A	4.96902	Tumor_G1
1124	MS4A6E	0.415542	Tumor_G1
1125	MS4A7	5.76776	Tumor_G1
1126	MS4A8	1.35451	Tumor_G1
1127	MS4A10	0	Tumor_G1
1128	MS4A12	0.0894982	Tumor_G1
1129	MS4A13	0	Tumor_G1
1130	MS4A14	3.10492	Tumor_G1
1131	MS4A15	2.63345	Tumor_G1
1132	MS4A18	0.113834	Tumor_G1
1133	TMEM176A	5.57009	Tumor_G1
1134	TMEM176B	7.13294	Tumor_G1
1135	MS4A1	0.750864	Tumor_G1
1136	MS4A2	1.57768	Tumor_G1
1137	MS4A3	0	Tumor_G1
1138	MS4A4A	5.58697	Tumor_G1
1139	MS4A4E	0.359071	Tumor_G1
1140	MS4A5	0	Tumor_G1
1141	MS4A6A	5.32949	Tumor_G1
1142	MS4A6E	0.731444	Tumor_G1
1143	MS4A7	4.92707	Tumor_G1
1144	MS4A8	0.183836	Tumor_G1
1145	MS4A10	0.0708015	Tumor_G1
1146	MS4A12	0	Tumor_G1
1147	MS4A13	0	Tumor_G1
1148	MS4A14	1.97556	Tumor_G1
1149	MS4A15	1.27935	Tumor_G1
1150	MS4A18	0	Tumor_G1
1151	TMEM176A	7.22409	Tumor_G1
1152	TMEM176B	8.65061	Tumor_G1
1153	MS4A1	1.99747	Tumor_G1
1154	MS4A2	1.80252	Tumor_G1
1155	MS4A3	0.124593	Tumor_G1
1156	MS4A4A	6.6889	Tumor_G1
1157	MS4A4E	2.88129	Tumor_G1
1158	MS4A5	0	Tumor_G1
1159	MS4A6A	7.25457	Tumor_G1
1160	MS4A6E	0.723864	Tumor_G1
1161	MS4A7	5.94415	Tumor_G1
1162	MS4A8	0.0347792	Tumor_G1
1163	MS4A10	0	Tumor_G1
1164	MS4A12	0	Tumor_G1
1165	MS4A13	0	Tumor_G1
1166	MS4A14	3.52404	Tumor_G1
1167	MS4A15	0.497331	Tumor_G1
1168	MS4A18	0	Tumor_G1
1169	TMEM176A	7.23318	Tumor_G1
1170	TMEM176B	8.64528	Tumor_G1
1171	MS4A1	0.989284	Tumor_G1
1172	MS4A2	1.29225	Tumor_G1
1173	MS4A3	0.0387171	Tumor_G1
1174	MS4A4A	2.8572	Tumor_G1
1175	MS4A4E	0.415867	Tumor_G1
1176	MS4A5	0	Tumor_G1
1177	MS4A6A	3.99539	Tumor_G1
1178	MS4A6E	0.0753273	Tumor_G1
1179	MS4A7	3.16588	Tumor_G1
1180	MS4A8	3.13829	Tumor_G1
1181	MS4A10	0.874207	Tumor_G1
1182	MS4A12	0	Tumor_G1
1183	MS4A13	0	Tumor_G1
1184	MS4A14	0.734916	Tumor_G1
1185	MS4A15	9.87051	Tumor_G1
1186	MS4A18	0.352307	Tumor_G1
1187	TMEM176A	4.96827	Tumor_G1
1188	TMEM176B	6.25847	Tumor_G1
1189	MS4A1	2.89819	Tumor_G1
1190	MS4A2	0.873183	Tumor_G1
1191	MS4A3	0	Tumor_G1
1192	MS4A4A	4.08127	Tumor_G1
1193	MS4A4E	0.151339	Tumor_G1
1194	MS4A5	0	Tumor_G1
1195	MS4A6A	4.40887	Tumor_G1
1196	MS4A6E	0.104873	Tumor_G1
1197	MS4A7	4.23567	Tumor_G1
1198	MS4A8	1.97508	Tumor_G1
1199	MS4A10	0	Tumor_G1
1200	MS4A12	0	Tumor_G1
1201	MS4A13	0	Tumor_G1
1202	MS4A14	1.2032	Tumor_G1
1203	MS4A15	3.93172	Tumor_G1
1204	MS4A18	0.53077	Tumor_G1
1205	TMEM176A	6.19681	Tumor_G1
1206	TMEM176B	7.779	Tumor_G1
1207	MS4A1	1.80418	Tumor_G1
1208	MS4A2	1.29131	Tumor_G1
1209	MS4A3	0.0619835	Tumor_G1
1210	MS4A4A	3.58362	Tumor_G1
1211	MS4A4E	0.448901	Tumor_G1
1212	MS4A5	0	Tumor_G1
1213	MS4A6A	4.04158	Tumor_G1
1214	MS4A6E	0.176067	Tumor_G1
1215	MS4A7	3.89535	Tumor_G1
1216	MS4A8	0.0504669	Tumor_G1
1217	MS4A10	0.0282862	Tumor_G1
1218	MS4A12	0	Tumor_G1
1219	MS4A13	0	Tumor_G1
1220	MS4A14	1.51051	Tumor_G1
1221	MS4A15	0.163756	Tumor_G1
1222	MS4A18	0	Tumor_G1
1223	TMEM176A	5.34795	Tumor_G1
1224	TMEM176B	6.9026	Tumor_G1
1225	MS4A1	3.58718	Tumor_G1
1226	MS4A2	2.11547	Tumor_G1
1227	MS4A3	0	Tumor_G1
1228	MS4A4A	4.7809	Tumor_G1
1229	MS4A4E	1.29895	Tumor_G1
1230	MS4A5	0	Tumor_G1
1231	MS4A6A	5.14558	Tumor_G1
1232	MS4A6E	0.378955	Tumor_G1
1233	MS4A7	4.45549	Tumor_G1
1234	MS4A8	3.34358	Tumor_G1
1235	MS4A10	0	Tumor_G1
1236	MS4A12	0	Tumor_G1
1237	MS4A13	0	Tumor_G1
1238	MS4A14	1.84647	Tumor_G1
1239	MS4A15	0.87578	Tumor_G1
1240	MS4A18	0	Tumor_G1
1241	TMEM176A	6.65152	Tumor_G1
1242	TMEM176B	7.97024	Tumor_G1
1243	MS4A1	0.879471	Tumor_G1
1244	MS4A2	1.80476	Tumor_G1
1245	MS4A3	0	Tumor_G1
1246	MS4A4A	3.72015	Tumor_G1
1247	MS4A4E	0.395502	Tumor_G1
1248	MS4A5	0	Tumor_G1
1249	MS4A6A	3.53619	Tumor_G1
1250	MS4A6E	0.466862	Tumor_G1
1251	MS4A7	3.83484	Tumor_G1
1252	MS4A8	0.143916	Tumor_G1
1253	MS4A10	0.120883	Tumor_G1
1254	MS4A12	0	Tumor_G1
1255	MS4A13	0	Tumor_G1
1256	MS4A14	0.9568	Tumor_G1
1257	MS4A15	4.4024	Tumor_G1
1258	MS4A18	0.0662614	Tumor_G1
1259	TMEM176A	3.96771	Tumor_G1
1260	TMEM176B	5.63098	Tumor_G1
1261	MS4A1	0.320889	Tumor_G1
1262	MS4A2	0.830418	Tumor_G1
1263	MS4A3	0	Tumor_G1
1264	MS4A4A	1.82969	Tumor_G1
1265	MS4A4E	0.270469	Tumor_G1
1266	MS4A5	0	Tumor_G1
1267	MS4A6A	2.10444	Tumor_G1
1268	MS4A6E	0.247806	Tumor_G1
1269	MS4A7	3.02388	Tumor_G1
1270	MS4A8	6.01405	Tumor_G1
1271	MS4A10	0.0604625	Tumor_G1
1272	MS4A12	0	Tumor_G1
1273	MS4A13	0.203138	Tumor_G1
1274	MS4A14	0.973868	Tumor_G1
1275	MS4A15	3.1106	Tumor_G1
1276	MS4A18	0	Tumor_G1
1277	TMEM176A	9.52738	Tumor_G1
1278	TMEM176B	10.4082	Tumor_G1
1279	MS4A1	3.18596	Tumor_G1
1280	MS4A2	2.37551	Tumor_G1
1281	MS4A3	0.207268	Tumor_G1
1282	MS4A4A	5.76324	Tumor_G1
1283	MS4A4E	0.593306	Tumor_G1
1284	MS4A5	0	Tumor_G1
1285	MS4A6A	5.75463	Tumor_G1
1286	MS4A6E	0.935912	Tumor_G1
1287	MS4A7	5.37789	Tumor_G1
1288	MS4A8	0.205518	Tumor_G1
1289	MS4A10	0.0221902	Tumor_G1
1290	MS4A12	0	Tumor_G1
1291	MS4A13	0	Tumor_G1
1292	MS4A14	1.60141	Tumor_G1
1293	MS4A15	2.24598	Tumor_G1
1294	MS4A18	0.0354832	Tumor_G1
1295	TMEM176A	5.16226	Tumor_G1
1296	TMEM176B	7.02436	Tumor_G1
1297	MS4A1	0.734135	Tumor_G1
1298	MS4A2	0.228357	Tumor_G1
1299	MS4A3	0	Tumor_G1
1300	MS4A4A	4.956	Tumor_G1
1301	MS4A4E	0.683472	Tumor_G1
1302	MS4A5	0	Tumor_G1
1303	MS4A6A	5.30017	Tumor_G1
1304	MS4A6E	0	Tumor_G1
1305	MS4A7	4.6787	Tumor_G1
1306	MS4A8	1.62391	Tumor_G1
1307	MS4A10	0	Tumor_G1
1308	MS4A12	0.0831112	Tumor_G1
1309	MS4A13	0	Tumor_G1
1310	MS4A14	0.817787	Tumor_G1
1311	MS4A15	0.416516	Tumor_G1
1312	MS4A18	0	Tumor_G1
1313	TMEM176A	6.00743	Tumor_G1
1314	TMEM176B	7.67527	Tumor_G1
1315	MS4A1	3.93246	Tumor_G1
1316	MS4A2	1.74476	Tumor_G1
1317	MS4A3	0.0692897	Tumor_G1
1318	MS4A4A	4.58136	Tumor_G1
1319	MS4A4E	1.40376	Tumor_G1
1320	MS4A5	0	Tumor_G1
1321	MS4A6A	5.53703	Tumor_G1
1322	MS4A6E	0	Tumor_G1
1323	MS4A7	4.65571	Tumor_G1
1324	MS4A8	0.898015	Tumor_G1
1325	MS4A10	1.71725	Tumor_G1
1326	MS4A12	0.152248	Tumor_G1
1327	MS4A13	0	Tumor_G1
1328	MS4A14	1.66134	Tumor_G1
1329	MS4A15	6.62491	Tumor_G1
1330	MS4A18	0.0994972	Tumor_G1
1331	TMEM176A	5.67519	Tumor_G1
1332	TMEM176B	7.56752	Tumor_G1
1333	MS4A1	1.18104	Tumor_G1
1334	MS4A2	3.07104	Tumor_G1
1335	MS4A3	0.0922074	Tumor_G1
1336	MS4A4A	5.61998	Tumor_G1
1337	MS4A4E	0.308594	Tumor_G1
1338	MS4A5	0	Tumor_G1
1339	MS4A6A	6.0169	Tumor_G1
1340	MS4A6E	0	Tumor_G1
1341	MS4A7	4.55555	Tumor_G1
1342	MS4A8	0	Tumor_G1
1343	MS4A10	0	Tumor_G1
1344	MS4A12	0	Tumor_G1
1345	MS4A13	0	Tumor_G1
1346	MS4A14	0.91976	Tumor_G1
1347	MS4A15	0	Tumor_G1
1348	MS4A18	0	Tumor_G1
1349	TMEM176A	6.17256	Tumor_G1
1350	TMEM176B	7.87298	Tumor_G1
1351	MS4A1	0.774249	Tumor_G1
1352	MS4A2	1.6364	Tumor_G1
1353	MS4A3	0	Tumor_G1
1354	MS4A4A	3.86627	Tumor_G1
1355	MS4A4E	0.532666	Tumor_G1
1356	MS4A5	0	Tumor_G1
1357	MS4A6A	3.59721	Tumor_G1
1358	MS4A6E	0.449112	Tumor_G1
1359	MS4A7	3.21903	Tumor_G1
1360	MS4A8	0.0932897	Tumor_G1
1361	MS4A10	0	Tumor_G1
1362	MS4A12	0	Tumor_G1
1363	MS4A13	0	Tumor_G1
1364	MS4A14	0.841812	Tumor_G1
1365	MS4A15	0.248535	Tumor_G1
1366	MS4A18	0	Tumor_G1
1367	TMEM176A	5.7873	Tumor_G1
1368	TMEM176B	7.10801	Tumor_G1
1369	MS4A1	4.20198	Tumor_G1
1370	MS4A2	2.57848	Tumor_G1
1371	MS4A3	0.0953168	Tumor_G1
1372	MS4A4A	5.3055	Tumor_G1
1373	MS4A4E	1.06074	Tumor_G1
1374	MS4A5	0	Tumor_G1
1375	MS4A6A	6.25062	Tumor_G1
1376	MS4A6E	0.683023	Tumor_G1
1377	MS4A7	4.89899	Tumor_G1
1378	MS4A8	4.11118	Tumor_G1
1379	MS4A10	0.0651587	Tumor_G1
1380	MS4A12	0	Tumor_G1
1381	MS4A13	0	Tumor_G1
1382	MS4A14	0.697151	Tumor_G1
1383	MS4A15	5.58466	Tumor_G1
1384	MS4A18	0.103531	Tumor_G1
1385	TMEM176A	6.49419	Tumor_G1
1386	TMEM176B	8.29404	Tumor_G1
1387	MS4A1	1.25393	Tumor_G1
1388	MS4A2	3.8127	Tumor_G1
1389	MS4A3	0.276794	Tumor_G1
1390	MS4A4A	5.1389	Tumor_G1
1391	MS4A4E	0.688404	Tumor_G1
1392	MS4A5	0	Tumor_G1
1393	MS4A6A	5.77875	Tumor_G1
1394	MS4A6E	0	Tumor_G1
1395	MS4A7	5.6338	Tumor_G1
1396	MS4A8	0.228357	Tumor_G1
1397	MS4A10	0.131326	Tumor_G1
1398	MS4A12	0	Tumor_G1
1399	MS4A13	0	Tumor_G1
1400	MS4A14	0.931305	Tumor_G1
1401	MS4A15	2.4936	Tumor_G1
1402	MS4A18	0.206268	Tumor_G1
1403	TMEM176A	5.12965	Tumor_G1
1404	TMEM176B	7.40341	Tumor_G1
1405	MS4A1	5.95352	Tumor_G1
1406	MS4A2	2.04177	Tumor_G1
1407	MS4A3	0.126973	Tumor_G1
1408	MS4A4A	4.69847	Tumor_G1
1409	MS4A4E	0.832769	Tumor_G1
1410	MS4A5	0	Tumor_G1
1411	MS4A6A	4.82197	Tumor_G1
1412	MS4A6E	1.72696	Tumor_G1
1413	MS4A7	4.08378	Tumor_G1
1414	MS4A8	6.32529	Tumor_G1
1415	MS4A10	0.0295589	Tumor_G1
1416	MS4A12	0	Tumor_G1
1417	MS4A13	0	Tumor_G1
1418	MS4A14	1.22571	Tumor_G1
1419	MS4A15	1.89829	Tumor_G1
1420	MS4A18	0.0932897	Tumor_G1
1421	TMEM176A	7.62286	Tumor_G1
1422	TMEM176B	8.76062	Tumor_G1
1423	MS4A1	2.80566	Tumor_G1
1424	MS4A2	1.22274	Tumor_G1
1425	MS4A3	0.107152	Tumor_G1
1426	MS4A4A	6.1135	Tumor_G1
1427	MS4A4E	0.290306	Tumor_G1
1428	MS4A5	0	Tumor_G1
1429	MS4A6A	6.20685	Tumor_G1
1430	MS4A6E	0.815166	Tumor_G1
1431	MS4A7	5.96561	Tumor_G1
1432	MS4A8	0.907198	Tumor_G1
1433	MS4A10	0	Tumor_G1
1434	MS4A12	0	Tumor_G1
1435	MS4A13	0	Tumor_G1
1436	MS4A14	0.66102	Tumor_G1
1437	MS4A15	2.02176	Tumor_G1
1438	MS4A18	0.0786098	Tumor_G1
1439	TMEM176A	7.52654	Tumor_G1
1440	TMEM176B	9.07069	Tumor_G1
1441	MS4A1	4.06267	Tumor_G1
1442	MS4A2	3.72883	Tumor_G1
1443	MS4A3	0.119688	Tumor_G1
1444	MS4A4A	5.51037	Tumor_G1
1445	MS4A4E	1.81553	Tumor_G1
1446	MS4A5	0	Tumor_G1
1447	MS4A6A	5.11355	Tumor_G1
1448	MS4A6E	0.648557	Tumor_G1
1449	MS4A7	6.23492	Tumor_G1
1450	MS4A8	4.51677	Tumor_G1
1451	MS4A10	0	Tumor_G1
1452	MS4A12	0	Tumor_G1
1453	MS4A13	0	Tumor_G1
1454	MS4A14	3.66644	Tumor_G1
1455	MS4A15	5.4948	Tumor_G1
1456	MS4A18	0	Tumor_G1
1457	TMEM176A	5.46626	Tumor_G1
1458	TMEM176B	7.4683	Tumor_G1
1459	MS4A1	4.13673	Tumor_G1
1460	MS4A2	3.17698	Tumor_G1
1461	MS4A3	0.0626744	Tumor_G1
1462	MS4A4A	4.97578	Tumor_G1
1463	MS4A4E	0.253747	Tumor_G1
1464	MS4A5	0	Tumor_G1
1465	MS4A6A	5.83696	Tumor_G1
1466	MS4A6E	0	Tumor_G1
1467	MS4A7	4.42827	Tumor_G1
1468	MS4A8	1.26448	Tumor_G1
1469	MS4A10	0.0565835	Tumor_G1
1470	MS4A12	0	Tumor_G1
1471	MS4A13	0	Tumor_G1
1472	MS4A14	1.36036	Tumor_G1
1473	MS4A15	2.84623	Tumor_G1
1474	MS4A18	0	Tumor_G1
1475	TMEM176A	6.00766	Tumor_G1
1476	TMEM176B	7.899	Tumor_G1
1477	MS4A1	2.3648	Tumor_G1
1478	MS4A2	1.57202	Tumor_G1
1479	MS4A3	0.0346383	Tumor_G1
1480	MS4A4A	4.42432	Tumor_G1
1481	MS4A4E	0.658554	Tumor_G1
1482	MS4A5	0	Tumor_G1
1483	MS4A6A	4.70319	Tumor_G1
1484	MS4A6E	0	Tumor_G1
1485	MS4A7	5.22753	Tumor_G1
1486	MS4A8	0.0556122	Tumor_G1
1487	MS4A10	0.031254	Tumor_G1
1488	MS4A12	0	Tumor_G1
1489	MS4A13	0	Tumor_G1
1490	MS4A14	1.57507	Tumor_G1
1491	MS4A15	8.39798	Tumor_G1
1492	MS4A18	0.508936	Tumor_G1
1493	TMEM176A	5.10541	Tumor_G1
1494	TMEM176B	6.94936	Tumor_G1
1495	MS4A1	2.67794	Tumor_G1
1496	MS4A2	0.660198	Tumor_G1
1497	MS4A3	0.0625362	Tumor_G1
1498	MS4A4A	5.12921	Tumor_G1
1499	MS4A4E	0.714399	Tumor_G1
1500	MS4A5	0	Tumor_G1
1501	MS4A6A	5.39994	Tumor_G1
1502	MS4A6E	0.12075	Tumor_G1
1503	MS4A7	4.98254	Tumor_G1
1504	MS4A8	2.33971	Tumor_G1
1505	MS4A10	0	Tumor_G1
1506	MS4A12	0	Tumor_G1
1507	MS4A13	0	Tumor_G1
1508	MS4A14	2.05554	Tumor_G1
1509	MS4A15	5.93625	Tumor_G1
1510	MS4A18	0	Tumor_G1
1511	TMEM176A	5.2473	Tumor_G1
1512	TMEM176B	7.4376	Tumor_G1
1513	MS4A1	4.2439	Tumor_G1
1514	MS4A2	3.06929	Tumor_G1
1515	MS4A3	0.249749	Tumor_G1
1516	MS4A4A	5.42089	Tumor_G1
1517	MS4A4E	0.916859	Tumor_G1
1518	MS4A5	0	Tumor_G1
1519	MS4A6A	5.67757	Tumor_G1
1520	MS4A6E	0.520447	Tumor_G1
1521	MS4A7	4.78355	Tumor_G1
1522	MS4A8	0	Tumor_G1
1523	MS4A10	0.511772	Tumor_G1
1524	MS4A12	0	Tumor_G1
1525	MS4A13	0	Tumor_G1
1526	MS4A14	1.10185	Tumor_G1
1527	MS4A15	3.55474	Tumor_G1
1528	MS4A18	0.185613	Tumor_G1
1529	TMEM176A	6.54956	Tumor_G1
1530	TMEM176B	8.65695	Tumor_G1
1531	MS4A1	1.17696	Tumor_G1
1532	MS4A2	1.48985	Tumor_G1
1533	MS4A3	0.141694	Tumor_G1
1534	MS4A4A	2.8837	Tumor_G1
1535	MS4A4E	0	Tumor_G1
1536	MS4A5	0	Tumor_G1
1537	MS4A6A	3.93373	Tumor_G1
1538	MS4A6E	0	Tumor_G1
1539	MS4A7	2.79346	Tumor_G1
1540	MS4A8	7.5297	Tumor_G1
1541	MS4A10	0	Tumor_G1
1542	MS4A12	0.494467	Tumor_G1
1543	MS4A13	0	Tumor_G1
1544	MS4A14	0.215244	Tumor_G1
1545	MS4A15	0	Tumor_G1
1546	MS4A18	0.292664	Tumor_G1
1547	TMEM176A	7.70922	Tumor_G1
1548	TMEM176B	9.0987	Tumor_G1
1549	MS4A1	5.1263	Tumor_G1
1550	MS4A2	2.06443	Tumor_G1
1551	MS4A3	0.0490731	Tumor_G1
1552	MS4A4A	4.13429	Tumor_G1
1553	MS4A4E	2.09491	Tumor_G1
1554	MS4A5	0	Tumor_G1
1555	MS4A6A	5.6767	Tumor_G1
1556	MS4A6E	0.268075	Tumor_G1
1557	MS4A7	4.76114	Tumor_G1
1558	MS4A8	5.10792	Tumor_G1
1559	MS4A10	0	Tumor_G1
1560	MS4A12	0	Tumor_G1
1561	MS4A13	0	Tumor_G1
1562	MS4A14	2.76975	Tumor_G1
1563	MS4A15	3.45891	Tumor_G1
1564	MS4A18	0	Tumor_G1
1565	TMEM176A	5.74606	Tumor_G1
1566	TMEM176B	7.82066	Tumor_G1
1567	MS4A1	2.47485	Tumor_G1
1568	MS4A2	2.24407	Tumor_G1
1569	MS4A3	0.0607392	Tumor_G1
1570	MS4A4A	5.14519	Tumor_G1
1571	MS4A4E	1.59412	Tumor_G1
1572	MS4A5	0	Tumor_G1
1573	MS4A6A	5.22175	Tumor_G1
1574	MS4A6E	0.117296	Tumor_G1
1575	MS4A7	4.84932	Tumor_G1
1576	MS4A8	0	Tumor_G1
1577	MS4A10	0	Tumor_G1
1578	MS4A12	0	Tumor_G1
1579	MS4A13	0	Tumor_G1
1580	MS4A14	2.50878	Tumor_G1
1581	MS4A15	0.436162	Tumor_G1
1582	MS4A18	0	Tumor_G1
1583	TMEM176A	4.74779	Tumor_G1
1584	TMEM176B	6.77163	Tumor_G1
1585	MS4A1	1.83362	Tumor_G1
1586	MS4A2	1.79967	Tumor_G1
1587	MS4A3	0.0423642	Tumor_G1
1588	MS4A4A	4.61097	Tumor_G1
1589	MS4A4E	0.45038	Tumor_G1
1590	MS4A5	0	Tumor_G1
1591	MS4A6A	4.4653	Tumor_G1
1592	MS4A6E	0.71914	Tumor_G1
1593	MS4A7	4.636	Tumor_G1
1594	MS4A8	0.496718	Tumor_G1
1595	MS4A10	0.0382957	Tumor_G1
1596	MS4A12	0	Tumor_G1
1597	MS4A13	0	Tumor_G1
1598	MS4A14	1.89836	Tumor_G1
1599	MS4A15	5.41192	Tumor_G1
1600	MS4A18	1.40409	Tumor_G1
1601	TMEM176A	4.88091	Tumor_G1
1602	TMEM176B	6.30372	Tumor_G1
1603	MS4A1	2.57904	Tumor_G1
1604	MS4A2	1.78802	Tumor_G1
1605	MS4A3	0	Tumor_G1
1606	MS4A4A	4.9877	Tumor_G1
1607	MS4A4E	0.582845	Tumor_G1
1608	MS4A5	0	Tumor_G1
1609	MS4A6A	5.10181	Tumor_G1
1610	MS4A6E	0.0458623	Tumor_G1
1611	MS4A7	4.56807	Tumor_G1
1612	MS4A8	3.36386	Tumor_G1
1613	MS4A10	0	Tumor_G1
1614	MS4A12	0.0781999	Tumor_G1
1615	MS4A13	0.0732718	Tumor_G1
1616	MS4A14	1.02247	Tumor_G1
1617	MS4A15	3.93175	Tumor_G1
1618	MS4A18	0.251689	Tumor_G1
1619	TMEM176A	5.17001	Tumor_G1
1620	TMEM176B	6.64474	Tumor_G1
1621	MS4A1	0.71396	Tumor_G1
1622	MS4A2	1.41116	Tumor_G1
1623	MS4A3	0	Tumor_G1
1624	MS4A4A	3.94007	Tumor_G1
1625	MS4A4E	1.28795	Tumor_G1
1626	MS4A5	0.0932897	Tumor_G1
1627	MS4A6A	4.14124	Tumor_G1
1628	MS4A6E	0.15782	Tumor_G1
1629	MS4A7	4.54473	Tumor_G1
1630	MS4A8	0.982072	Tumor_G1
1631	MS4A10	0	Tumor_G1
1632	MS4A12	0	Tumor_G1
1633	MS4A13	0	Tumor_G1
1634	MS4A14	2.10735	Tumor_G1
1635	MS4A15	2.72131	Tumor_G1
1636	MS4A18	0	Tumor_G1
1637	TMEM176A	5.66648	Tumor_G1
1638	TMEM176B	7.47669	Tumor_G1
1639	MS4A1	3.22836	Tumor_G1
1640	MS4A2	2.58301	Tumor_G1
1641	MS4A3	0	Tumor_G1
1642	MS4A4A	3.11183	Tumor_G1
1643	MS4A4E	0.459012	Tumor_G1
1644	MS4A5	0	Tumor_G1
1645	MS4A6A	4.0846	Tumor_G1
1646	MS4A6E	0	Tumor_G1
1647	MS4A7	3.29911	Tumor_G1
1648	MS4A8	0.47747	Tumor_G1
1649	MS4A10	0	Tumor_G1
1650	MS4A12	0	Tumor_G1
1651	MS4A13	0	Tumor_G1
1652	MS4A14	0.28155	Tumor_G1
1653	MS4A15	4.87975	Tumor_G1
1654	MS4A18	0	Tumor_G1
1655	TMEM176A	4.52473	Tumor_G1
1656	TMEM176B	6.17591	Tumor_G1
1657	MS4A1	1.68131	Tumor_G1
1658	MS4A2	1.49175	Tumor_G1
1659	MS4A3	0	Tumor_G1
1660	MS4A4A	2.62345	Tumor_G1
1661	MS4A4E	0.757279	Tumor_G1
1662	MS4A5	0	Tumor_G1
1663	MS4A6A	3.46993	Tumor_G1
1664	MS4A6E	0	Tumor_G1
1665	MS4A7	3.06645	Tumor_G1
1666	MS4A8	2.64127	Tumor_G1
1667	MS4A10	0.204015	Tumor_G1
1668	MS4A12	0	Tumor_G1
1669	MS4A13	0	Tumor_G1
1670	MS4A14	2.06454	Tumor_G1
1671	MS4A15	4.87775	Tumor_G1
1672	MS4A18	0.575119	Tumor_G1
1673	TMEM176A	4.69847	Tumor_G1
1674	TMEM176B	5.88816	Tumor_G1
1675	MS4A1	2.41652	Tumor_G1
1676	MS4A2	1.0795	Tumor_G1
1677	MS4A3	0	Tumor_G1
1678	MS4A4A	4.14682	Tumor_G1
1679	MS4A4E	1.04446	Tumor_G1
1680	MS4A5	0	Tumor_G1
1681	MS4A6A	4.67134	Tumor_G1
1682	MS4A6E	0.113167	Tumor_G1
1683	MS4A7	4.31642	Tumor_G1
1684	MS4A8	2.79919	Tumor_G1
1685	MS4A10	0.0267292	Tumor_G1
1686	MS4A12	0	Tumor_G1
1687	MS4A13	0	Tumor_G1
1688	MS4A14	1.24957	Tumor_G1
1689	MS4A15	2.0285	Tumor_G1
1690	MS4A18	0	Tumor_G1
1691	TMEM176A	5.00731	Tumor_G1
1692	TMEM176B	6.52398	Tumor_G1
1693	MS4A1	0.62368	Tumor_G1
1694	MS4A2	1.72984	Tumor_G1
1695	MS4A3	0.14965	Tumor_G1
1696	MS4A4A	4.58188	Tumor_G1
1697	MS4A4E	0.585347	Tumor_G1
1698	MS4A5	0	Tumor_G1
1699	MS4A6A	5.05282	Tumor_G1
1700	MS4A6E	0.281431	Tumor_G1
1701	MS4A7	3.84391	Tumor_G1
1702	MS4A8	0.437867	Tumor_G1
1703	MS4A10	0	Tumor_G1
1704	MS4A12	0	Tumor_G1
1705	MS4A13	0	Tumor_G1
1706	MS4A14	1.10796	Tumor_G1
1707	MS4A15	2.84491	Tumor_G1
1708	MS4A18	0	Tumor_G1
1709	TMEM176A	6.14233	Tumor_G1
1710	TMEM176B	8.06097	Tumor_G1
1711	MS4A1	2.67252	Tumor_G1
1712	MS4A2	1.28812	Tumor_G1
1713	MS4A3	0.0354832	Tumor_G1
1714	MS4A4A	4.45443	Tumor_G1
1715	MS4A4E	0.423955	Tumor_G1
1716	MS4A5	0	Tumor_G1
1717	MS4A6A	4.50065	Tumor_G1
1718	MS4A6E	0.134878	Tumor_G1
1719	MS4A7	4.00514	Tumor_G1
1720	MS4A8	5.50516	Tumor_G1
1721	MS4A10	0.265077	Tumor_G1
1722	MS4A12	0	Tumor_G1
1723	MS4A13	0	Tumor_G1
1724	MS4A14	1.55562	Tumor_G1
1725	MS4A15	6.95005	Tumor_G1
1726	MS4A18	1.10883	Tumor_G1
1727	TMEM176A	4.06455	Tumor_G1
1728	TMEM176B	5.73952	Tumor_G1
1729	MS4A1	6.01504	Tumor_G1
1730	MS4A2	2.75009	Tumor_G1
1731	MS4A3	0.044604	Tumor_G1
1732	MS4A4A	4.40031	Tumor_G1
1733	MS4A4E	1.83414	Tumor_G1
1734	MS4A5	0	Tumor_G1
1735	MS4A6A	4.8274	Tumor_G1
1736	MS4A6E	0.580242	Tumor_G1
1737	MS4A7	5.61808	Tumor_G1
1738	MS4A8	0.412619	Tumor_G1
1739	MS4A10	0	Tumor_G1
1740	MS4A12	0	Tumor_G1
1741	MS4A13	0	Tumor_G1
1742	MS4A14	2.58019	Tumor_G1
1743	MS4A15	6.13096	Tumor_G1
1744	MS4A18	0.296546	Tumor_G1
1745	TMEM176A	5.54466	Tumor_G1
1746	TMEM176B	7.0722	Tumor_G1
1747	MS4A1	0.518233	Tumor_G1
1748	MS4A2	0.0758749	Tumor_G1
1749	MS4A3	0	Tumor_G1
1750	MS4A4A	2.44159	Tumor_G1
1751	MS4A4E	0.0835197	Tumor_G1
1752	MS4A5	0	Tumor_G1
1753	MS4A6A	2.43691	Tumor_G1
1754	MS4A6E	0.664665	Tumor_G1
1755	MS4A7	1.87389	Tumor_G1
1756	MS4A8	0.459117	Tumor_G1
1757	MS4A10	0.0213376	Tumor_G1
1758	MS4A12	0	Tumor_G1
1759	MS4A13	0	Tumor_G1
1760	MS4A14	0.0724488	Tumor_G1
1761	MS4A15	3.19322	Tumor_G1
1762	MS4A18	0.193961	Tumor_G1
1763	TMEM176A	6.65997	Tumor_G1
1764	TMEM176B	7.78448	Tumor_G1
1765	MS4A1	0.0727232	Tumor_G1
1766	MS4A2	0.304628	Tumor_G1
1767	MS4A3	0.082975	Tumor_G1
1768	MS4A4A	1.25102	Tumor_G1
1769	MS4A4E	0.146525	Tumor_G1
1770	MS4A5	0	Tumor_G1
1771	MS4A6A	1.88827	Tumor_G1
1772	MS4A6E	0	Tumor_G1
1773	MS4A7	1.4784	Tumor_G1
1774	MS4A8	0	Tumor_G1
1775	MS4A10	0	Tumor_G1
1776	MS4A12	0	Tumor_G1
1777	MS4A13	0	Tumor_G1
1778	MS4A14	0.369829	Tumor_G1
1779	MS4A15	0.0384362	Tumor_G1
1780	MS4A18	0	Tumor_G1
1781	TMEM176A	2.12052	Tumor_G1
1782	TMEM176B	3.53787	Tumor_G1
1783	MS4A1	2.93716	Tumor_G1
1784	MS4A2	3.84657	Tumor_G1
1785	MS4A3	0.218099	Tumor_G1
1786	MS4A4A	4.75507	Tumor_G1
1787	MS4A4E	0.943884	Tumor_G1
1788	MS4A5	0	Tumor_G1
1789	MS4A6A	5.42701	Tumor_G1
1790	MS4A6E	0.716157	Tumor_G1
1791	MS4A7	4.12043	Tumor_G1
1792	MS4A8	3.52292	Tumor_G1
1793	MS4A10	0.03492	Tumor_G1
1794	MS4A12	0.0437644	Tumor_G1
1795	MS4A13	0	Tumor_G1
1796	MS4A14	0.771209	Tumor_G1
1797	MS4A15	3.55681	Tumor_G1
1798	MS4A18	0.161565	Tumor_G1
1799	TMEM176A	5.47026	Tumor_G1
1800	TMEM176B	6.9242	Tumor_G1
1801	MS4A1	1.6819	Tumor_G1
1802	MS4A2	1.13034	Tumor_G1
1803	MS4A3	0.0784732	Tumor_G1
1804	MS4A4A	4.7389	Tumor_G1
1805	MS4A4E	0.932893	Tumor_G1
1806	MS4A5	0	Tumor_G1
1807	MS4A6A	4.8205	Tumor_G1
1808	MS4A6E	0.52657	Tumor_G1
1809	MS4A7	4.11172	Tumor_G1
1810	MS4A8	1.22478	Tumor_G1
1811	MS4A10	0	Tumor_G1
1812	MS4A12	0	Tumor_G1
1813	MS4A13	0	Tumor_G1
1814	MS4A14	1.14137	Tumor_G1
1815	MS4A15	0.236952	Tumor_G1
1816	MS4A18	0	Tumor_G1
1817	TMEM176A	7.18527	Tumor_G1
1818	TMEM176B	8.69193	Tumor_G1
1819	MS4A1	0.779806	Tumor_G1
1820	MS4A2	1.3069	Tumor_G1
1821	MS4A3	0.135535	Tumor_G1
1822	MS4A4A	3.11836	Tumor_G1
1823	MS4A4E	0.0669502	Tumor_G1
1824	MS4A5	0	Tumor_G1
1825	MS4A6A	2.86916	Tumor_G1
1826	MS4A6E	0.175557	Tumor_G1
1827	MS4A7	3.38024	Tumor_G1
1828	MS4A8	1.5708	Tumor_G1
1829	MS4A10	0	Tumor_G1
1830	MS4A12	0	Tumor_G1
1831	MS4A13	0	Tumor_G1
1832	MS4A14	0.706376	Tumor_G1
1833	MS4A15	0.378179	Tumor_G1
1834	MS4A18	0	Tumor_G1
1835	TMEM176A	4.65271	Tumor_G1
1836	TMEM176B	6.04371	Tumor_G1
1837	MS4A1	4.37679	Tumor_G1
1838	MS4A2	0.786764	Tumor_G1
1839	MS4A3	0	Tumor_G1
1840	MS4A4A	6.16548	Tumor_G1
1841	MS4A4E	0.391108	Tumor_G1
1842	MS4A5	0	Tumor_G1
1843	MS4A6A	6.76228	Tumor_G1
1844	MS4A6E	0.481402	Tumor_G1
1845	MS4A7	5.62812	Tumor_G1
1846	MS4A8	2.20486	Tumor_G1
1847	MS4A10	0	Tumor_G1
1848	MS4A12	0	Tumor_G1
1849	MS4A13	0	Tumor_G1
1850	MS4A14	1.37718	Tumor_G1
1851	MS4A15	4.76058	Tumor_G1
1852	MS4A18	0.0589399	Tumor_G1
1853	TMEM176A	6.29619	Tumor_G1
1854	TMEM176B	8.23743	Tumor_G1
1855	MS4A1	1.50345	Tumor_G1
1856	MS4A2	0.214125	Tumor_G1
1857	MS4A3	0	Tumor_G1
1858	MS4A4A	4.85391	Tumor_G1
1859	MS4A4E	0.740971	Tumor_G1
1860	MS4A5	0	Tumor_G1
1861	MS4A6A	4.87108	Tumor_G1
1862	MS4A6E	0	Tumor_G1
1863	MS4A7	3.82675	Tumor_G1
1864	MS4A8	0.162081	Tumor_G1
1865	MS4A10	0	Tumor_G1
1866	MS4A12	0	Tumor_G1
1867	MS4A13	0	Tumor_G1
1868	MS4A14	1.67138	Tumor_G1
1869	MS4A15	2.27384	Tumor_G1
1870	MS4A18	0	Tumor_G1
1871	TMEM176A	6.48003	Tumor_G1
1872	TMEM176B	7.65424	Tumor_G1
1873	MS4A1	5.7253	Tumor_G1
1874	MS4A2	2.45988	Tumor_G1
1875	MS4A3	0.0973411	Tumor_G1
1876	MS4A4A	4.75442	Tumor_G1
1877	MS4A4E	1.30012	Tumor_G1
1878	MS4A5	0	Tumor_G1
1879	MS4A6A	5.23385	Tumor_G1
1880	MS4A6E	0.185867	Tumor_G1
1881	MS4A7	4.93675	Tumor_G1
1882	MS4A8	0.930018	Tumor_G1
1883	MS4A10	0	Tumor_G1
1884	MS4A12	0	Tumor_G1
1885	MS4A13	0	Tumor_G1
1886	MS4A14	1.96403	Tumor_G1
1887	MS4A15	2.66637	Tumor_G1
1888	MS4A18	0.856866	Tumor_G1
1889	TMEM176A	4.81352	Tumor_G1
1890	TMEM176B	6.45944	Tumor_G1
1891	MS4A1	1.15872	Tumor_G1
1892	MS4A2	0.0542233	Tumor_G1
1893	MS4A3	0	Tumor_G1
1894	MS4A4A	1.35721	Tumor_G1
1895	MS4A4E	0.161307	Tumor_G1
1896	MS4A5	0	Tumor_G1
1897	MS4A6A	1.98463	Tumor_G1
1898	MS4A6E	0	Tumor_G1
1899	MS4A7	1.19812	Tumor_G1
1900	MS4A8	0.0927487	Tumor_G1
1901	MS4A10	0	Tumor_G1
1902	MS4A12	0	Tumor_G1
1903	MS4A13	0	Tumor_G1
1904	MS4A14	0.278223	Tumor_G1
1905	MS4A15	0.641639	Tumor_G1
1906	MS4A18	0.307895	Tumor_G1
1907	TMEM176A	4.35811	Tumor_G1
1908	TMEM176B	6.11637	Tumor_G1
1909	MS4A1	3.40338	Tumor_G1
1910	MS4A2	0.629566	Tumor_G1
1911	MS4A3	0.0999011	Tumor_G1
1912	MS4A4A	2.44345	Tumor_G1
1913	MS4A4E	1.17632	Tumor_G1
1914	MS4A5	0	Tumor_G1
1915	MS4A6A	3.71142	Tumor_G1
1916	MS4A6E	0.0662614	Tumor_G1
1917	MS4A7	2.63666	Tumor_G1
1918	MS4A8	0.231801	Tumor_G1
1919	MS4A10	0.0903115	Tumor_G1
1920	MS4A12	0	Tumor_G1
1921	MS4A13	0	Tumor_G1
1922	MS4A14	1.14828	Tumor_G1
1923	MS4A15	0.904349	Tumor_G1
1924	MS4A18	0.142871	Tumor_G1
1925	TMEM176A	5.09994	Tumor_G1
1926	TMEM176B	7.00336	Tumor_G1
1927	MS4A1	3.07181	Tumor_G1
1928	MS4A2	3.28716	Tumor_G1
1929	MS4A3	0.133037	Tumor_G1
1930	MS4A4A	4.45998	Tumor_G1
1931	MS4A4E	0.723952	Tumor_G1
1932	MS4A5	0	Tumor_G1
1933	MS4A6A	5.13768	Tumor_G1
1934	MS4A6E	0	Tumor_G1
1935	MS4A7	4.73265	Tumor_G1
1936	MS4A8	2.80312	Tumor_G1
1937	MS4A10	0	Tumor_G1
1938	MS4A12	0	Tumor_G1
1939	MS4A13	0	Tumor_G1
1940	MS4A14	1.07361	Tumor_G1
1941	MS4A15	0.19774	Tumor_G1
1942	MS4A18	0	Tumor_G1
1943	TMEM176A	7.02789	Tumor_G1
1944	TMEM176B	8.75485	Tumor_G1
1945	MS4A1	1.91934	Tumor_G1
1946	MS4A2	4.33974	Tumor_G1
1947	MS4A3	0.0608775	Tumor_G1
1948	MS4A4A	3.11622	Tumor_G1
1949	MS4A4E	0.552771	Tumor_G1
1950	MS4A5	0	Tumor_G1
1951	MS4A6A	4.09245	Tumor_G1
1952	MS4A6E	0	Tumor_G1
1953	MS4A7	3.34832	Tumor_G1
1954	MS4A8	4.62713	Tumor_G1
1955	MS4A10	0	Tumor_G1
1956	MS4A12	0	Tumor_G1
1957	MS4A13	0	Tumor_G1
1958	MS4A14	0.721766	Tumor_G1
1959	MS4A15	1.38471	Tumor_G1
1960	MS4A18	0	Tumor_G1
1961	TMEM176A	4.61905	Tumor_G1
1962	TMEM176B	5.91125	Tumor_G1
1963	MS4A1	2.00169	Tumor_G1
1964	MS4A2	0.886121	Tumor_G1
1965	MS4A3	0.0409625	Tumor_G1
1966	MS4A4A	3.93833	Tumor_G1
1967	MS4A4E	1.35676	Tumor_G1
1968	MS4A5	0	Tumor_G1
1969	MS4A6A	4.96379	Tumor_G1
1970	MS4A6E	0.360308	Tumor_G1
1971	MS4A7	4.90211	Tumor_G1
1972	MS4A8	2.1175	Tumor_G1
1973	MS4A10	0.0368901	Tumor_G1
1974	MS4A12	0	Tumor_G1
1975	MS4A13	0	Tumor_G1
1976	MS4A14	1.5141	Tumor_G1
1977	MS4A15	2.16835	Tumor_G1
1978	MS4A18	0	Tumor_G1
1979	TMEM176A	4.62731	Tumor_G1
1980	TMEM176B	6.32844	Tumor_G1
1981	MS4A1	1.50026	Tumor_G1
1982	MS4A2	4.78485	Tumor_G1
1983	MS4A3	0.421551	Tumor_G1
1984	MS4A4A	3.19411	Tumor_G1
1985	MS4A4E	1.4126	Tumor_G1
1986	MS4A5	0	Tumor_G1
1987	MS4A6A	3.49796	Tumor_G1
1988	MS4A6E	0.0959019	Tumor_G1
1989	MS4A7	3.48943	Tumor_G1
1990	MS4A8	1.50425	Tumor_G1
1991	MS4A10	0	Tumor_G1
1992	MS4A12	0	Tumor_G1
1993	MS4A13	0	Tumor_G1
1994	MS4A14	0.713637	Tumor_G1
1995	MS4A15	1.98373	Tumor_G1
1996	MS4A18	0	Tumor_G1
1997	TMEM176A	2.89352	Tumor_G1
1998	TMEM176B	4.44477	Tumor_G1
1999	MS4A1	0.686792	Tumor_G1
[truncated: 8,351 more rows]
