# Supplementary material for: Role of the membrane-spanning 4A gene family in lung adenocarcinoma
Source: Front Genet. 2023 Jul 18;14:1162787. doi: 10.3389/fgene.2023.1162787 (PMC10390740; doi:10.3389/fgene.2023.1162787)
Supplement: Supplementary file 10 [file Table5.XLSX]

## Sheet: Sheet1
MS4A2			MS4A7			MS4A14			MS4A15
Normal	LUAD		Normal	LUAD		Normal	LUAD		Normal	LUAD
1.09674	304.531		1.00066	0.759058		1.09583	22.6341		1.01435	1.68057
1.01927	0.231758		1.00457	0.0360547		1.02011	0.0131812		1.00352	0.00201092
1.00428	0.510892		1.02424	0.0346529		1.03444	0.533447		1.00808	0.0069141
1.00033	1.60512		1.01276	0.0455363		1.08971	0.753972		1.00116	11.7632
1.45052	3.18024		1.01001	0.108823		1.00527	0.180259		1.02136	0.0800753
1.05217	4.51136		1.02124	0.253167		1.01745	1.66563		1.00061	0.336567
1.04872	2.28092		1.01048	0.244222		1.00567	0.579746		1.00437	0.357899
1.00296	0.00339621		1.00014	0.00413667		1.00135	0.00297023		1.00338	0.00207
1.00135	0.646746		1.0083	1.02096		1.00917	4.23126		1.0105	5.94029
